# Supplementary material for: Phosphine-catalyzed [3 + 2] annulation of β-sulfonamido-substituted enones withtrans-α-cyano-α,β-unsaturated ketones for the synthesis of highly substituted pyrrolidines
Source: Royal Society of Chemistry journal article supplement (doi:10.1039/d1ra07881j), 2021-01-01
Supplement: d1ra07881j1.pdf [file d1ra07881j1.pdf]

## *Supporting Information*

### **Phosphine-Catalyzed [3+2] Annulation of $\beta$ -Sulfonamido-Substituted Enones with *trans*- $\alpha$ -Cyano- $\alpha,\beta$ -Unsaturated Ketones for the Synthesis of Highly Substituted Pyrrolidines**

Zhenzhen Gao,\*<sup>a</sup> Lei Xie,<sup>a</sup> Lusha Ji,<sup>a</sup> Xin Ma,<sup>a</sup> Xiaojing Li,<sup>a</sup> Honglei Liu\*<sup>b</sup> and Hongchao Guo<sup>c</sup>

<sup>a</sup>School of Pharmacy, Liaocheng University, Liaocheng 252000, Shandong, P. R. China. *Email:* gaozhenzhen@lcu.edu.cn

<sup>b</sup>College of Materials Science and Engineering, Qingdao University, Qing dao, Shandong, P. R. China. *Email:*

<sup>c</sup>Department of Applied Chemistry, China Agricultural University, Beijing 100193, China

#### **Table of Contents**

|                                                                                                          |        |
|----------------------------------------------------------------------------------------------------------|--------|
| General Information                                                                                      | S2     |
| General Procedure for Preparation of <i>trans</i> - $\alpha$ -Cyano- $\alpha,\beta$ -Unsaturated Ketones | S2     |
| General Procedure for Preparation of $\beta$ -Sulfonamido-Substituted Enones                             | S3     |
| General Procedure for Preparation of [3+2] Products                                                      | S4     |
| Screening Reaction Conditions for [3+2] Annulation                                                       | S4     |
| Characterization Data for the Products 3                                                                 | S5-S16 |
| Scaled-up Synthesis of the Product <b>3aa</b>                                                            |        |
| Transformation of the Product <b>3ma</b>                                                                 |        |
| <sup>1</sup> H and <sup>13</sup> C NMR Spectra of New Compounds                                          | S18    |
| X-Ray Crystallographic Data of <b>3aa</b>                                                                | S46    |

## General Information

All reactions were performed under Ar atmospheres in oven-dried glassware with magnetic stirring. Unless otherwise stated, all reagents were purchased from commercial suppliers and used without further purification. All solvents were purified and dried according to standard methods prior to use. Organic solutions were concentrated under reduced pressure on a rotary evaporator or an oil pump. Reactions were monitored through thin layer chromatography (TLC) on silica gel-precoated glass plates. Chromatograms were visualized by fluorescence quenching with UV light at 254 nm. Flash column chromatography was performed using Qingdao Haiyang flash silica gel (200–300 mesh).  $^1\text{H}$  and  $^{13}\text{C}$  NMR spectra were recorded in  $\text{CDCl}_3$  using a 400 or 500 MHz NMR instrument (referenced internally to  $\text{Me}_4\text{Si}$ ).  $^1\text{H}$  NMR data are reported as follows: chemical shift, multiplicity (s = singlet; d = doublet; q = quartet; m = multiplet; br = broad), coupling constant (Hz), and integral. Data for  $^{13}\text{C}$  NMR spectra are reported in terms of chemical shift. Melting points were determined by an X-4 digital micro melting point apparatus. Accurate mass measurements were performed using an Agilent instrument with the ESI-MS technique. X-ray crystallographic data were collected using a Gemini E Rigaku.

## General Procedure for Synthesis of *trans*- $\alpha$ -Cyano- $\alpha,\beta$ -Unsaturated Ketones **1**<sup>[1]</sup> and $\beta$ -Sulfonamido-Substituted Enones **2**<sup>[2]</sup>.

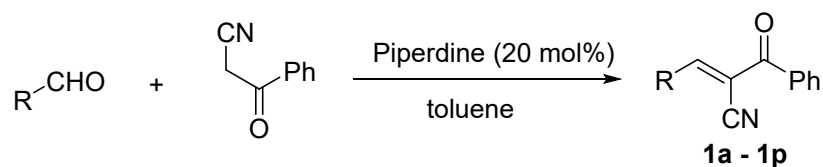

The corresponding aldehyde (1 mmol) and piperidine (2 mol %, 0.02 mmol, 2  $\mu\text{L}$ ) was added to the solution of benzyolacetonitril (1mmol, 145 mg), 4Å MS (10 mg) in toluene (7.5 mL) under argon atmosphere. The reaction mixture was heated at 80°C for 8 hours. The concentrated mixture was purified by silica gel column chromatography (4-6% EA in Hexane) to give the products **1a-1p**.

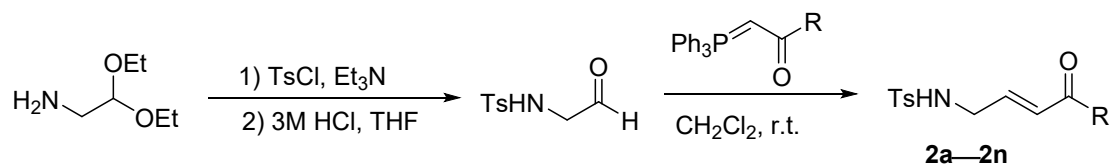

To a stirred solution of aminoacetaldehyde diethyl acetal (7.26 mL, 50.0 mmol) and anhydrous  $\text{Et}_3\text{N}$  (14.0 mL, 100 mmol) in  $\text{CH}_2\text{Cl}_2$  (100 mL) was added dropwise a solution of *p*-toluenesulfonyl chloride (10.5 g, 55.0 mmol) in  $\text{CH}_2\text{Cl}_2$  (100 mL) over 30 min at 0 °C. After 2 h the reaction mixture was diluted with water (200 mL). The organic layer was separated and the aqueous layer was extracted with  $\text{CH}_2\text{Cl}_2$  (100 mL). The organic extracts were combined, washed with 1 M aq. HCl (50 mL), water (100 mL), and saturated aq.  $\text{NaHCO}_3$  (100 mL), dried over  $\text{Na}_2\text{SO}_4$ , and concentrated *in vacuo*. Purification of the residue by silica gel column chromatography (petroleum ether/EtOAc 4:1) afforded the tosylamino acetaldehyde diethyl acetal as a white solid. To a solution of the sulfonamide (5.0 mmol) in THF (50 mL) was added 3 M aq. HCl (15 mL) at room temperature, and the reaction mixture was stirred for 24 h at room temperature. The reaction mixture was then diluted with EtOAc (50 mL) and washed with brine (50 mL). The organic portion was then dried over  $\text{Na}_2\text{SO}_4$  and concentrated *in vacuo* to afford the corresponding tosylamino acetaldehyde which was used without further purification. Wittig reagent (5.0 mmol, 1 equiv) was added to a solution of tosylamino acetaldehyde (5.0 mmol, 1 equiv) in  $\text{CH}_2\text{Cl}_2$  (30 mL) in round bottom flask. The solution was stirred at r.t. for 30 h. After concentration under reduced pressure, the residue was purified by flash chromatography (petroleum ether/EtOAc 3:1) to afford products **2a-2n**.

---

1. Pan, S. C., Nath, U. *Eur. J. Org. Chem.* **2017**, 43, 6457.

2. Zhao, B.; Du, D. *Asian J. Org. Chem.* **2015**, 4, 1120.

## General Procedure for [3+2] Annulation of $\beta$ -Sulfonamido-Substituted Enones and *trans*- $\alpha$ -Cyano- $\alpha,\beta$ -Unsaturated Ketones

Under argon atmosphere, to a mixture of unsaturated ketones **1** (0.12 mmol),  $\beta$ -sulfonamido-substituted enones **2** (0.1 mmol) and catalyst  $\text{PMe}_3$  (20 mol %, 0.02 mmol) in a Schlenk tube, 5 mL of  $\text{CHCl}_3$  was added at room temperature. The resulting mixture was stirred until the starting material was completely consumed (monitored by TLC) and then was concentrated to dryness. The residue was purified through flash column chromatography (EtOAc / PE) to afford the corresponding cycloaddition products **3**.

### Screening Reaction Conditions for [3+2] Annulation

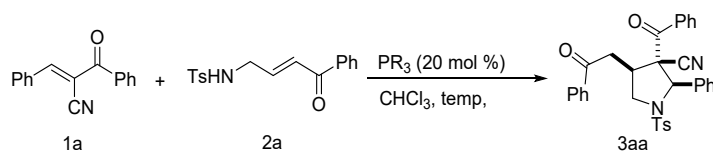

| Entry | $\text{PR}_3$  | Temperature/ $^\circ\text{C}$ | $t/\text{h}$ | Additive                 | Con./mol/L $^{-1}$ | yield(%) <sup>b</sup> | dr <sup>c</sup> |
|-------|----------------|-------------------------------|--------------|--------------------------|--------------------|-----------------------|-----------------|
| 1     | $\text{PMe}_3$ | 25                            | 72           | PhCOOH                   | 0.02               | 35                    | -               |
| 2     | $\text{PMe}_3$ | 25                            | 72           | $\text{Et}_3\text{N}$    | 0.02               | NR                    | -               |
| 3     | $\text{PMe}_3$ | 25                            | 72           | $\text{Na}_2\text{CO}_3$ | 0.02               | 76                    | 13:1            |
| 4     | $\text{PMe}_3$ | -20                           | 72           | -                        | 0.02               | NR                    | 3:1             |
| 5     | $\text{PMe}_3$ | 0                             | 72           | -                        | 0.02               | Trace                 | 3:1             |
| 6     | $\text{PMe}_3$ | 40                            | 24           | -                        | 0.02               | 83                    | 8:1             |

<sup>a</sup>Unless otherwise indicated, all reactions were carried out at room temperature using 0.12 mmol of **1aa** and 0.1 mmol of **2aa** in a solvent containing 20 mol % of the catalyst. <sup>b</sup>Isolated yield. <sup>c</sup>Determined by  $^1\text{H NMR}$ .

### Characterization Data of the Products 3

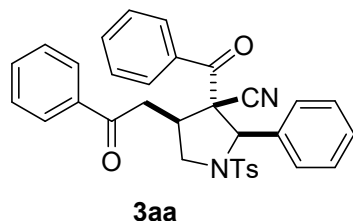

White solid, 86% yield, 14:1 dr. Purified by flash chromatography (12% EtOAc/PE). mp = 166-167 °C;  $^1\text{H}$  NMR (500 MHz,  $\text{CDCl}_3$ )  $\delta$  7.82 – 7.72 (m, 2H), 7.62 (d,  $J$  = 8.2 Hz, 2H), 7.48 (t,  $J$  = 7.4 Hz, 1H), 7.44 – 7.34 (m, 3H), 7.34 – 7.23 (m, 9H), 7.19 – 7.16 (m, 2H), 4.91 (s, 1H), 4.34 (dd,  $J$  = 11.8, 7.4 Hz, 1H), 3.60 – 3.46 (m, 1H), 3.28 – 3.19 (m, 1H), 3.18 – 3.14 (m, 1H), 3.04 (dd,  $J$  = 17.5, 4.6 Hz, 1H), 2.39 (s, 3H).  $^{13}\text{C}$  NMR (126 MHz,  $\text{CDCl}_3$ )  $\delta$  194.9, 190.3, 143.4, 134.8, 134.6, 134.1, 132.8, 132.7, 132.4, 128.9, 128.4, 128.3, 127.7, 127.5, 127.2, 127.1, 127.0, 126.9, 116.0, 70.8, 63.8, 52.0, 41.6, 37.0, 20.6; HRMS (ESI) calcd for  $\text{C}_{33}\text{H}_{29}\text{N}_2\text{O}_4\text{S}^+$   $[\text{M}+\text{H}]^+$  549.1848, found 549.1849.

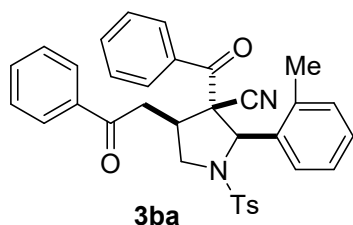

White solid, 75% yield, 10.5:1 dr. Purified by flash chromatography (12% EtOAc/PE). mp = 179-180 °C;  $^1\text{H}$  NMR (400 MHz,  $\text{CDCl}_3$ )  $\delta$  7.87 – 7.77 (m, 2H), 7.76 – 7.68 (m, 1H), 7.63 – 7.53 (m, 2H), 7.53 – 7.46 (m, 1H), 7.45 – 7.35 (m, 3H), 7.33 – 7.29 (m, 2H), 7.28 – 7.23 (m, 3H), 7.22 – 7.13 (m, 3H), 6.99 – 6.89 (m, 1H), 5.24 (s, 1H), 4.38 (dd,  $J$  = 11.5, 7.0 Hz, 1H), 3.51 (t,  $J$  = 11.1 Hz, 1H), 3.45 – 3.28 (m, 1H), 3.21 – 3.12 (m, 1H), 3.10 – 3.00 (m, 1H), 2.38 (s, 3H), 1.86 (s, 3H).  $^{13}\text{C}$  NMR (101 MHz,  $\text{CDCl}_3$ )  $\delta$  196.1, 191.1, 144.3, 136.0, 135.9, 134.6, 134.2, 134.1, 134.0, 133.8, 130.4, 129.9, 129.3, 129.0, 128.9, 128.8, 128.3, 128.1, 127.9, 126.6, 117.2, 66.5, 64.2, 52.6, 42.9, 38.0, 21.7, 19.4. HRMS (ESI) calcd for  $\text{C}_{34}\text{H}_{31}\text{N}_2\text{O}_4\text{S}^+$   $[\text{M}+\text{H}]^+$  563.2005, found 563.2007.

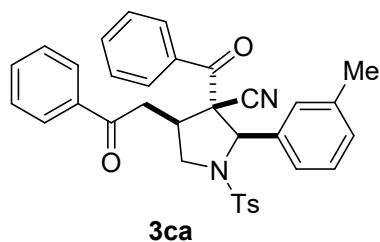

White solid, 77% yield, 12.5:1 dr. Purified by flash chromatography (12% EtOAc/PE). mp = 176-177 °C; <sup>1</sup>H NMR (500 MHz, CDCl<sub>3</sub>) δ 7.77 (dd, *J* = 8.3, 1.1 Hz, 2H), 7.61 (d, *J* = 8.3 Hz, 2H), 7.52 – 7.46 (m, 1H), 7.45 – 7.39 (m, 1H), 7.34 (ddd, *J* = 12.1, 9.6, 4.6 Hz, 4H), 7.28 (d, *J* = 8.0 Hz, 2H), 7.21 – 7.13 (m, 3H), 7.12 – 6.98 (m, 3H), 4.89 (s, 1H), 4.36 (dd, *J* = 11.8, 7.4 Hz, 1H), 3.59 – 3.43 (m, 1H), 3.24 (tdd, *J* = 10.9, 7.5, 4.6 Hz, 1H), 3.14 (dd, *J* = 17.5, 9.1 Hz, 1H), 3.03 (dd, *J* = 17.5, 4.6 Hz, 1H), 2.39 (s, 3H), 2.19 (s, 3H). <sup>13</sup>C NMR (126 MHz, CDCl<sub>3</sub>) δ 194.9, 190.5, 143.3, 137.1, 134.8, 134.4, 134.2, 132.8, 129.1, 128.9, 128.6, 128.4, 127.7, 127.6, 127.4, 127.2, 127.0, 126.9, 126.3, 124.1, 116.0, 70.7, 63.9, 51.9, 41.6, 36.9, 20.6, 20.4. HRMS (ESI) calcd for C<sub>34</sub>H<sub>31</sub>N<sub>2</sub>O<sub>4</sub>S<sup>+</sup> [M+H]<sup>+</sup> 563.2005, found 563.2008.

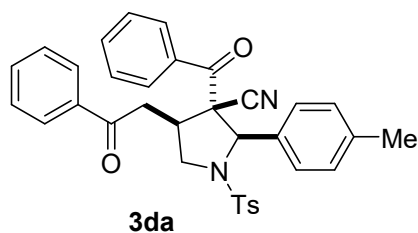

White solid, 78% yield, 10.5:1 dr. Purified by flash chromatography (12% EtOAc/PE). mp = 177-178 °C; <sup>1</sup>H NMR (500 MHz, CDCl<sub>3</sub>) δ 7.77 (dd, *J* = 8.3, 1.1 Hz, 2H), 7.63 (d, *J* = 8.2 Hz, 2H), 7.51 – 7.47 (m, 1H), 7.41 (dd, *J* = 10.6, 4.3 Hz, 1H), 7.38 – 7.27 (m, 6H), 7.20 (ddd, *J* = 7.5, 6.0, 4.1 Hz, 4H), 7.08 (d, *J* = 7.8 Hz, 2H), 4.87 (s, 1H), 4.31 (dd, *J* = 11.8, 7.3 Hz, 1H), 3.53 (dd, *J* = 11.6, 10.7 Hz, 1H), 3.22 (tdd, *J* = 10.3, 8.1, 4.3 Hz, 1H), 3.14 (t, *J* = 8.7 Hz, 1H), 3.03 (dd, *J* = 17.3, 4.3 Hz, 1H), 2.40 (s, 3H), 2.30 (s, 3H). <sup>13</sup>C NMR (126 MHz, CDCl<sub>3</sub>) δ 194.9, 190.5, 143.3, 138.2, 134.8, 134.2, 132.8, 132.7, 132.4, 131.6, 128.9, 128.4, 128.2, 127.7, 127.2, 127.0, 126.9, 126.9, 116.1, 70.6, 63.9, 52.0, 41.5, 37.0, 20.6, 20.3. HRMS (ESI) calcd for C<sub>34</sub>H<sub>31</sub>N<sub>2</sub>O<sub>4</sub>S<sup>+</sup> [M+H]<sup>+</sup> 563.2005, found 563.2008.

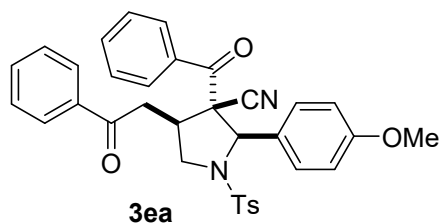

White solid, 80% yield, 14:1 dr. Purified by flash chromatography (12% EtOAc/PE). mp = 127-128 °C; <sup>1</sup>H NMR (500 MHz, CDCl<sub>3</sub>) δ 7.77 (d, *J* = 7.3 Hz, 2H), 7.60 (d, *J* = 8.2 Hz, 2H), 7.49 (t, *J* = 7.4 Hz, 1H), 7.42 (t, *J* = 7.4 Hz, 1H), 7.39 – 7.32 (m, 4H), 7.30 – 7.27 (m, 2H), 7.26 – 7.18 (m, 4H), 6.84 – 6.74 (m, 2H), 4.83 (s, 1H), 4.32 (dd, *J* = 11.8, 7.5 Hz, 1H), 3.75 (s, 3H), 3.56 – 3.49 (m, 1H), 3.28 – 3.20 (m, 1H), 3.18 – 3.10 (m, 1H), 3.07 – 3.00 (m, 1H), 2.40 (s, 3H). <sup>13</sup>C NMR (126 MHz, CDCl<sub>3</sub>) δ 195.0, 190.5, 159.3, 143.3, 134.8, 134.2, 132.8, 132.7, 132.4, 128.9, 128.3, 128.4, 127.7, 127.2, 127.0, 126.9, 126.4, 116.2, 112.9, 70.5, 63.9, 54.3, 51.9, 41.3, 37.1, 20.6. HRMS (ESI) calcd for C<sub>34</sub>H<sub>31</sub>N<sub>2</sub>O<sub>5</sub>S<sup>+</sup> [M+H]<sup>+</sup> 579.1954., found 579.1958.

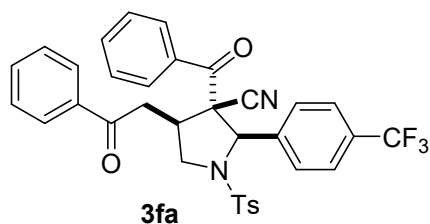

White solid, 66% yield, 10.5:1 dr. Purified by flash chromatography (12% EtOAc/PE). mp = 138-139 °C; <sup>1</sup>H NMR (500 MHz, CDCl<sub>3</sub>) δ 7.81 – 7.71 (m, 2H), 7.65 – 7.59 (m, 2H), 7.52 – 7.47 (m, 3H), 7.46 – 7.40 (m, 3H), 7.40 – 7.32 (m, 4H), 7.32 – 7.27 (m, 2H), 7.22 – 7.17 (m, 2H), 5.04 (s, 1H), 4.47 – 4.24 (m, 1H), 3.62 – 3.45 (m, 1H), 3.25 – 3.12 (m, 2H), 3.12 – 3.03 (m, 1H), 2.40 (s, 3H). <sup>13</sup>C NMR (126 MHz, CDCl<sub>3</sub>) δ 194.7, 189.7, 143.7, 138.8, 134.7, 134.0, 133.2, 132.8, 132.1, 130.5, 130.2, 129.1, 128.8, 128.3, 128.1, 127.8, 127.7, 127.5, 127.4, 127.0, 126.5, 124.5, 123.9, 121.7, 115.7, 69.9, 63.4, 52.0, 42.0, 36.9, 20.6. HRMS (ESI) calcd for C<sub>34</sub>H<sub>28</sub>F<sub>3</sub>N<sub>2</sub>O<sub>4</sub>S<sup>+</sup> [M+H]<sup>+</sup> 616.1644, found 616.1648.

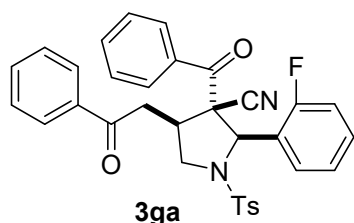

White solid, 72% yield, 9.5:1 dr. Purified by flash chromatography (12% EtOAc/PE). mp = 163-164 °C; <sup>1</sup>H NMR (400 MHz, CDCl<sub>3</sub>) δ 7.94 – 7.79 (m, 1H), 7.79 – 7.68 (m, 4H), 7.53 – 7.39 (m, 5H), 7.39 – 7.33 (m, 4H), 7.32 – 7.26 (m, 1H), 7.24 – 7.17 (m, 2H), 6.92 – 6.77 (m, 1H), 5.33 (s, 1H), 4.29 (dd, *J* = 12.0, 6.4 Hz, 1H), 3.58 – 3.43 (m, 1H), 3.21 – 2.95 (m, 3H), 2.41 (s, 3H). <sup>13</sup>C NMR (101 MHz, CDCl<sub>3</sub>) δ 195.9, 190.4, 161.3, 158.8, 144.7, 135.8, 134.8, 134.0, 133.8, 132.8, 130.9, 130.8, 130.2, 129.2, 128.8, 128.4, 128.1, 124.8, 124.2, 124.0, 116.9, 63.8, 52.9, 43.3, 37.9, 29.7, 21.8. HRMS (ESI) calcd for C<sub>33</sub>H<sub>28</sub>FN<sub>2</sub>O<sub>4</sub>S<sup>+</sup> [M+H]<sup>+</sup> 567.1754, found 567.1756.

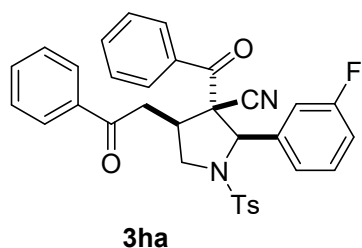

White solid, 74% yield, 6:1 dr. Purified by flash chromatography (12% EtOAc/PE). mp = 134-135 °C; <sup>1</sup>H NMR (500 MHz, CDCl<sub>3</sub>) δ 7.76 (d, *J* = 7.5 Hz, 2H), 7.64 (d, *J* = 8.2 Hz, 2H), 7.46 (dd, *J* = 18.0, 7.4 Hz, 2H), 7.43 – 7.39 (m, 2H), 7.38 – 7.27 (m, 4H), 7.22 (t, *J* = 7.9 Hz, 3H), 7.09 – 6.97 (m, 3H), 4.98 (s, 1H), 4.32 (dd, *J* = 11.8, 6.8 Hz, 1H), 3.52 (dd, *J* = 13.1, 9.1 Hz, 1H), 3.17 (dt, *J* = 17.1, 6.4 Hz, 2H), 3.06 (t, *J* = 10.7 Hz, 1H), 2.40 (s, 3H). <sup>13</sup>C NMR (126 MHz, CDCl<sub>3</sub>) δ 194.8, 190.1, 162.6, 160.6, 143.6, 137.4, 134.7, 134.1, 132.9 (d, *J* = 31.2 Hz), 132.2, 129.0, 128.3, 127.8, 127.4, 127.0, 126.9, 122.6, 122.6, 115.4 (d, *J* = 21.1 Hz), 114.1 (d, *J* = 22.8 Hz), 70.0, 63.6, 52.0, 41.9, 36.9, 20.7. HRMS (ESI) calcd for C<sub>33</sub>H<sub>28</sub>FN<sub>2</sub>O<sub>4</sub>S<sup>+</sup> [M+H]<sup>+</sup> 567.1754, found 567.1760.



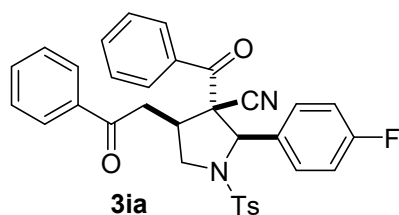

White solid, 76% yield, 5:1 dr. Purified by flash chromatography (12% EtOAc/PE). mp = 134-135 °C; <sup>1</sup>H NMR (500 MHz, CDCl<sub>3</sub>) δ 7.77 (d, *J* = 7.4 Hz, 2H), 7.62 (d, *J* = 8.3 Hz, 2H), 7.49 (t, *J* = 7.4 Hz, 1H), 7.45 – 7.41 (m, 2H), 7.36 (dt, *J* = 4.3, 3.4 Hz, 4H), 7.30 (d, *J* = 8.1 Hz, 3H), 7.21 (dd, *J* = 17.1, 9.0 Hz, 2H), 6.96 (t, *J* = 8.5 Hz, 2H), 4.91 (s, 1H), 4.33 (dd, *J* = 11.8, 7.2 Hz, 1H), 3.57 – 3.48 (m, 1H), 3.25 – 3.19 (m, 1H), 3.18 – 3.12 (m, 1H), 3.05 (dd, *J* = 17.1, 4.2 Hz, 1H), 2.41 (s, 3H). <sup>13</sup>C NMR (126 MHz, CDCl<sub>3</sub>) δ 194.8, 190.1, 163.2, 161.2, 143.6, 134.7, 134.1, 132.9 (d, *J* = 26.8 Hz), 132.2, 129.0, 128.9, 128.3, 127.7, 127.4, 126.9 (d, *J* = 11.1 Hz), 115.9, 114.7, 114.5, 70.1, 51.9, 41.6, 37.0, 28.7, 20.7. HRMS (ESI) calcd for C<sub>33</sub>H<sub>28</sub>FN<sub>2</sub>O<sub>4</sub>S<sup>+</sup> [M+H]<sup>+</sup> 567.1754, found 567.1760.

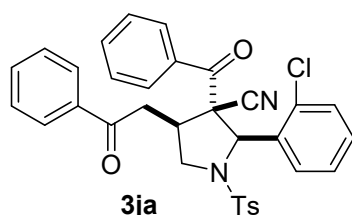

White solid, 74% yield, 8:1 dr. Purified by flash chromatography (12% EtOAc/PE). mp = 201-202 °C; <sup>1</sup>H NMR (400 MHz, CDCl<sub>3</sub>) δ 8.00 – 7.90 (m, 1H), 7.82 – 7.73 (m, 4H), 7.59 – 7.45 (m, 2H), 7.45 – 7.38 (m, 4H), 7.38 – 7.34 (m, 3H), 7.32 – 7.26 (m, 1H), 7.23 – 7.17 (m, 3H), 5.46 (s, 1H), 4.37 – 4.14 (m, 1H), 3.65 – 3.44 (m, 1H), 3.21 – 3.10 (m, 2H), 3.09 – 2.99 (m, 1H), 2.42 (s, 3H). <sup>13</sup>C NMR (101 MHz, CDCl<sub>3</sub>) δ 194.9, 189.1, 143.7, 134.8, 133.6, 133.5, 133.1, 132.8, 132.4, 131.4, 129.4, 129.3, 129.1, 128.3, 128.2, 127.8, 127.3, 127.0, 126.9, 126.5, 115.9, 65.5, 62.5, 51.8, 42.1, 36.9, 20.7. HRMS (ESI) calcd for C<sub>33</sub>H<sub>28</sub>ClN<sub>2</sub>O<sub>4</sub>S<sup>+</sup> [M+H]<sup>+</sup> 583.1458, found 583.1454.

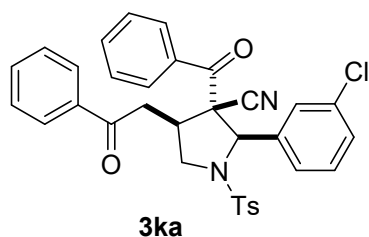

White solid, 76 % yield, 10:1 dr. Purified by flash chromatography (12% EtOAc/PE). mp = 198-199 °C; <sup>1</sup>H NMR (500 MHz, CDCl<sub>3</sub>) δ 7.86 – 7.72 (m, 2H), 7.66 – 7.59 (m, 2H), 7.59 – 7.47 (m, 1H), 7.47 – 7.39 (m, 4H), 7.36 (m, 2H), 7.30 (m, 2H), 7.28 – 7.19 (m, 5H), 4.97 (s, 1H), 4.34 (dd, *J* = 11.7, 7.1 Hz, 1H), 3.58 – 3.44 (m, 1H), 3.24 – 3.12 (m, 2H), 3.06 (m, 1H), 2.40 (s, 3H). <sup>13</sup>C NMR (126 MHz, CDCl<sub>3</sub>) δ 194.8, 189.9, 143.6, 134.7, 133.7, 133.5, 133.1, 132.8, 132.4, 129.0, 128.8, 128.5, 128.3, 128.0, 127.8, 127.5, 127.1, 127.0, 126.9, 126.4, 115.7, 69.8, 63.6, 51.9, 41.9, 36.9, 20.7. HRMS (ESI) calcd for C<sub>33</sub>H<sub>28</sub>ClN<sub>2</sub>O<sub>4</sub>S<sup>+</sup> [M+H]<sup>+</sup> 583.1458, found 583.1457.

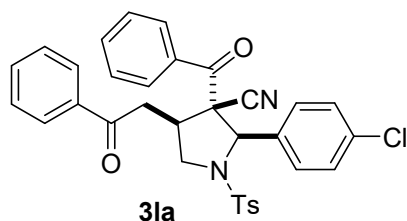

White solid, 82 % yield, 5:1 dr. Purified by flash chromatography (12% EtOAc/PE). mp = 200-201 °C; <sup>1</sup>H NMR (500 MHz, CDCl<sub>3</sub>) δ 7.76 (d, *J* = 7.4 Hz, 2H), 7.62 (d, *J* = 8.1 Hz, 2H), 7.47 (ddd, *J* = 11.9, 11.1, 5.6 Hz, 3H), 7.42 – 7.37 (m, 4H), 7.37 – 7.29 (m, 4H), 7.25 (s, 2H), 7.23 – 7.18 (m, 1H), 4.93 (d, *J* = 6.2 Hz, 1H), 4.36 – 4.26 (m, 1H), 3.52 (t, *J* = 11.1 Hz, 1H), 3.23 – 3.12 (m, 2H), 3.05 (dd, *J* = 16.5, 3.6 Hz, 1H), 2.41 (s, 3H). <sup>13</sup>C NMR (126 MHz, CDCl<sub>3</sub>) δ 194.8, 190.0, 143.6, 134.7, 133.8, 133.3, 133.1, 132.8, 132.2, 129.0, 128.8, 128.6, 128.3, 128.0, 127.8, 127.6, 127.4, 127.0, 126.9, 126.4, 115.9, 70.0, 63.6, 52.0, 41.8, 36.9, 20.7. HRMS (ESI) calcd for C<sub>33</sub>H<sub>28</sub>ClN<sub>2</sub>O<sub>4</sub>S<sup>+</sup> [M+H]<sup>+</sup> 583.1458, found 583.1454.

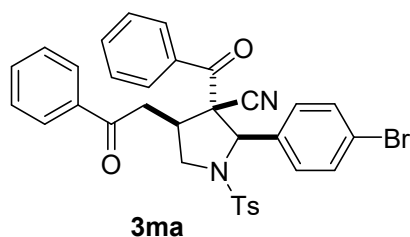

White solid, 85% yield, 6:1 dr. Purified by flash chromatography (12% EtOAc/PE). mp = 100-101 °C; <sup>1</sup>H NMR (500 MHz, CDCl<sub>3</sub>) δ 7.76 (d, *J* = 7.4 Hz, 2H), 7.62 (d, *J* = 8.2 Hz, 2H), 7.49 (t, *J* = 7.4 Hz, 1H), 7.45 (dd, *J* = 9.5, 4.4 Hz, 1H), 7.39 (t, *J* = 7.0 Hz, 4H), 7.36 – 7.33 (m, 2H), 7.30 (d, *J* = 8.0 Hz, 2H), 7.26 – 7.17 (m, 4H), 4.93 (d, *J* = 6.2 Hz, 1H), 4.35 – 4.28 (m, 1H), 3.52 (dd, *J* = 14.1, 8.1 Hz, 1H), 3.24 – 3.09 (m, 2H), 3.09 – 2.98 (m, 1H), 2.41 (s, 3H). <sup>13</sup>C NMR (126 MHz, CDCl<sub>3</sub>) δ 194.8, 190.0, 143.6, 134.7, 133.8, 133.3, 132.8, 132.2, 129.0, 128.8, 128.6, 128.3, 128.0, 127.8, 127.4, 127.0, 126.9, 126.4, 115.8, 70.0, 63.5, 52.0, 41.8, 36.9, 20.7. HRMS (ESI) calcd for C<sub>33</sub>H<sub>28</sub>BrN<sub>2</sub>O<sub>4</sub>S<sup>+</sup> [M+H]<sup>+</sup> 627.0953, found 627.0952.

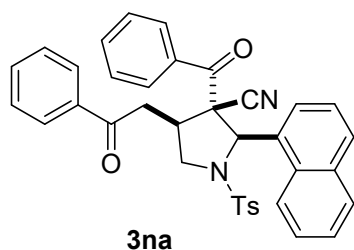

White solid, 81% yield, 14:1 dr. Purified by flash chromatography (12% EtOAc/PE). mp = 163-164 °C; <sup>1</sup>H NMR (500 MHz, CDCl<sub>3</sub>) δ 7.81 – 7.73 (m, 4H), 7.64 – 7.60 (m, 3H), 7.52 – 7.46 (m, 2H), 7.45 – 7.30 (m, 8H), 7.23 (d, *J* = 8.0 Hz, 2H), 7.07 (t, *J* = 7.9 Hz, 2H), 5.13 (s, 1H), 4.41 (dd, *J* = 11.8, 7.4 Hz, 1H), 3.66 – 3.53 (m, 1H), 3.35 – 3.25 (m, 1H), 3.19 (dd, *J* = 17.6, 9.1 Hz, 1H), 3.08 (dd, *J* = 17.6, 4.7 Hz, 1H), 2.35 (s, 3H). <sup>13</sup>C NMR (101 MHz, CDCl<sub>3</sub>) δ 196.0, 192.1, 144.5, 135.9, 134.7, 133.8, 133.5, 133.2, 131.9, 130.8, 130.0, 129.7, 129.2, 129.0, 128.8, 128.2, 128.1, 128.0, 127.2, 126.7, 125.7, 125.5, 121.6, 117.1, 66.2, 65.0, 53.1, 43.9, 38.1, 21.7. HRMS (ESI) calcd for C<sub>37</sub>H<sub>31</sub>N<sub>2</sub>O<sub>4</sub>S<sup>+</sup> [M+H]<sup>+</sup> 599.2005, found 599.2005.

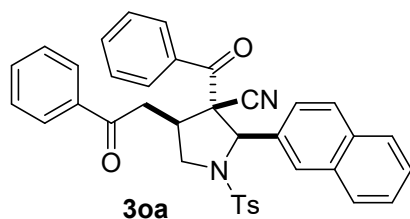

White solid, 80% yield, 8:1 dr. Purified by flash chromatography (12% EtOAc/PE). mp = 161-162 °C; <sup>1</sup>H NMR (400 MHz, CDCl<sub>3</sub>) δ 8.09 (d, *J* = 7.3 Hz, 1H), 7.86 – 7.73 (m, 4H), 7.66 (d, *J* = 7.9 Hz, 2H), 7.57 (t, *J* = 7.7 Hz, 1H), 7.49 (t, *J* = 7.4 Hz, 1H), 7.37 (dd, *J* = 16.4, 8.5 Hz, 3H), 7.31 (d, *J* = 7.9 Hz, 2H), 7.27 – 7.20 (m, 2H), 7.18 – 7.09 (m, 3H), 7.00 – 6.90 (m, 2H), 5.93 (s, 1H), 4.40 (dd, *J* = 11.8, 7.0 Hz, 1H), 3.62 (t, *J* = 11.0 Hz, 1H), 3.41 – 3.28 (m, 1H), 3.27 – 3.15 (m, 1H), 3.12 – 3.02 (m, 1H), 2.41 (s, 3H). <sup>13</sup>C NMR (126 MHz, CDCl<sub>3</sub>) δ 194.9, 190.4, 143.4, 134.8, 134.1, 132.8, 132.7, 132.6, 132.0, 131.8, 128.9, 128.3, 127.8, 127.4, 127.2, 127.0, 126.9, 126.7, 126.6, 125.4, 124.2, 116.0, 70.8, 63.8, 52.0, 41.8, 37.0, 20.6. HRMS (ESI) calcd for C<sub>37</sub>H<sub>31</sub>N<sub>2</sub>O<sub>4</sub>S<sup>+</sup> [M+H]<sup>+</sup> 599.2005, found 599.2002.

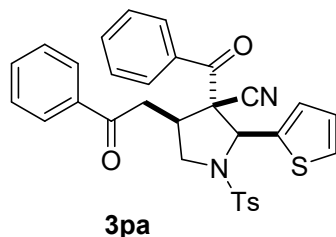

White solid, 78% yield, 7:1 dr. Purified by flash chromatography (12% EtOAc/PE). mp = 135-136 °C; <sup>1</sup>H NMR (500 MHz, CDCl<sub>3</sub>) δ 7.79 (dd, *J* = 8.3, 1.1 Hz, 2H), 7.66 – 7.54 (m, 4H), 7.48 (ddd, *J* = 13.8, 10.6, 4.3 Hz, 3H), 7.37 (dd, *J* = 10.7, 4.8 Hz, 2H), 7.28 (ddd, *J* = 6.0, 5.4, 4.4 Hz, 4H), 7.04 (d, *J* = 3.4 Hz, 1H), 6.92 (dd, *J* = 5.1, 3.6 Hz, 1H), 5.34 (s, 1H), 4.22 – 4.06 (m, 1H), 3.50 (dd, *J* = 11.6, 9.3 Hz, 1H), 3.34 – 3.23 (m, 2H), 3.16 (t, *J* = 8.2 Hz, 1H), 2.39 (s, 3H). <sup>13</sup>C NMR (101 MHz, CDCl<sub>3</sub>) δ 193.2, 190.5, 162.3, 159.7, 143.4, 134.5, 134.3, 132.8, 132.4, 129.6, 128.9, 128.3, 128.3, 127.5, 127.2, 126.9, 123.6, 115.9, 115.7, 70.9, 63.7, 52.0, 41.8, 41.7, 20.7. HRMS (ESI) calcd for C<sub>31</sub>H<sub>27</sub>N<sub>2</sub>O<sub>4</sub>S<sub>2</sub><sup>+</sup> [M+H]<sup>+</sup> 555.1412, found 555.1411.

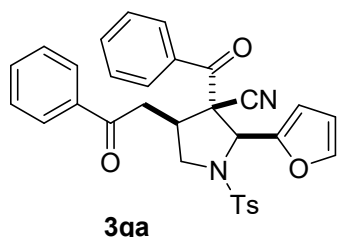

White solid, 80% yield, 14:1 dr. Purified by flash chromatography (12% EtOAc/PE). mp = 123-125 °C; <sup>1</sup>H NMR (500 MHz, CDCl<sub>3</sub>) δ 7.88 – 7.80 (m, 2H), 7.79 – 7.70 (m, 2H), 7.55 – 7.46 (m, 4H), 7.41 – 7.32 (m, 4H), 7.30 (s, 1H), 7.20 – 7.15 (m, 2H), 6.50 (s, 1H), 6.35 (d, *J* = 1.7 Hz, 1H), 5.25 (s, 1H), 4.07 – 3.92 (m, 1H), 3.57 – 3.46 (m, 1H), 3.45 – 3.36 (m, 2H), 3.36 – 3.28 (m, 1H), 2.35 (s, 3H). <sup>13</sup>C NMR (126 MHz, CDCl<sub>3</sub>) δ 195.4, 188.4, 148.1, 143.1, 142.4, 135.0, 133.3, 132.7, 132.6, 132.4, 128.8, 128.6, 127.9, 127.8, 127.7, 127.6, 127.1, 127.0, 126.6, 126.2, 115.3, 110.2, 109.9, 62.4, 60.0, 51.5, 39.7, 38.1, 20.6. HRMS (ESI) calcd for C<sub>31</sub>H<sub>27</sub>N<sub>2</sub>O<sub>5</sub>S<sup>+</sup> [M+H]<sup>+</sup> 539.16461, found 539.1646.

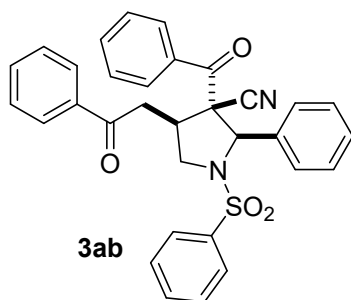

White solid, 84% yield, 10:1 dr. Purified by flash chromatography (12% EtOAc/PE). mp = 157-158 °C; <sup>1</sup>H NMR (500 MHz, CDCl<sub>3</sub>) δ 7.81 – 7.68 (m, 4H), 7.63 – 7.54 (m, 1H), 7.53 – 7.46 (m, 3H), 7.41 (t, *J* = 7.5 Hz, 1H), 7.36 (t, *J* = 7.8 Hz, 2H), 7.29 (m, 7.7 Hz, 7H), 7.18 (t, *J* = 7.9 Hz, 2H), 4.95 (s, 1H), 4.38 (dd, *J* = 11.8, 7.4 Hz, 1H), 3.60 – 3.47 (m, 1H), 3.29 – 3.20 (m, 1H), 3.19 – 3.12 (m, 1H), 3.04 (dd, *J* = 17.5, 4.4 Hz, 1H). <sup>13</sup>C NMR (101 MHz, CDCl<sub>3</sub>) δ 194.8, 190.2, 135.4, 134.7, 134.4, 134.0, 132.9, 132.8, 132.5, 128.4, 128.3, 128.0, 127.7, 127.6, 127.3, 127.0, 126.8, 116.0, 70.7, 63.7, 51.9, 41.7, 36.9. HRMS (ESI) calcd for C<sub>32</sub>H<sub>27</sub>N<sub>2</sub>O<sub>4</sub>S<sup>+</sup> [M+H]<sup>+</sup> 535.1692, found 535.1692.

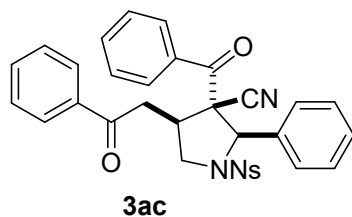

White solid, 81% yield, 4.5:1 dr. Purified by flash chromatography (12% EtOAc/PE). mp = 125-126 °C; <sup>1</sup>H NMR (400 MHz, CDCl<sub>3</sub>) δ 8.31 – 8.22 (m, 2H), 8.05 – 7.96 (m, 1H), 7.87 – 7.76 (m, 3H), 7.75 – 7.57 (m, 1H), 7.54 – 7.41 (m, 2H), 7.40 – 7.27 (m, 5H), 7.27 – 7.16 (m, 5H), 5.03 (s, 1H), 4.47 (dd, *J* = 11.6, 7.2 Hz, 1H), 3.56 (t, *J* = 11.2 Hz, 1H), 3.41 – 3.27 (m, 1H), 3.26 – 2.84 (m, 2H). <sup>13</sup>C NMR (101 MHz, CDCl<sub>3</sub>) δ 195.8, 190.9, 150.4, 143.0, 135.7, 134.8, 134.7, 134.2, 134.0, 129.8, 129.5, 129.0, 128.9, 128.7, 128.5, 128.2, 128.1, 124.4, 116.9, 71.5, 64.4, 52.9, 43.0, 37.9. HRMS (ESI) calcd for C<sub>32</sub>H<sub>26</sub>N<sub>3</sub>O<sub>6</sub>S<sup>+</sup> [M+H]<sup>+</sup> 580.1542, found 580.1541.

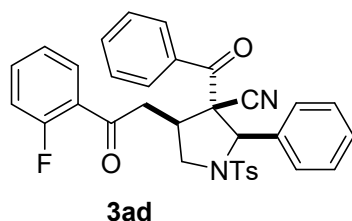

White solid, 77% yield, 8:1 dr. Purified by flash chromatography (12% EtOAc/PE). mp = 163-164 °C; <sup>1</sup>H NMR (500 MHz, CDCl<sub>3</sub>) δ 7.71 (t, *J* = 7.7, 1.7 Hz, 1H), 7.63 (d, *J* = 8.2 Hz, 2H), 7.50 – 7.37 (m, 3H), 7.35 – 7.27 (m, 8H), 7.21 – 7.13 (m, 3H), 7.01 (t, *J* = 7.8, 6.1 Hz, 1H), 4.95 (s, 1H), 4.33 (dd, *J* = 11.8, 7.0 Hz, 1H), 3.61 – 3.49 (m, 1H), 3.28 – 3.15 (m, 2H), 3.12 – 3.01 (m, 1H), 2.40 (s, 3H). <sup>13</sup>C NMR (101 MHz, CDCl<sub>3</sub>) δ 194.5, 190.4, 143.7, 143.4, 134.6, 134.1, 132.8, 132.31, 132.28, 129.0, 128.4, 128.3, 127.9, 127.5, 127.2, 127.1, 127.0, 126.9, 116.0, 70.8, 63.8, 52.0, 41.7, 36.8, 20.7. HRMS (ESI) calcd for C<sub>33</sub>H<sub>28</sub>FN<sub>2</sub>O<sub>4</sub>S<sup>+</sup> [M+H]<sup>+</sup> 567.1754, found 567.1760.

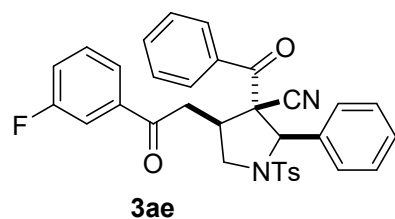

White solid, 79% yield, 9:1 dr. Purified by flash chromatography (12% EtOAc/PE). mp = 134-135 °C; <sup>1</sup>H NMR (500 MHz, CDCl<sub>3</sub>) δ 7.71 (td, *J* = 7.7, 1.8 Hz, 1H), 7.62 (t, *J* = 7.9 Hz, 2H), 7.49 – 7.38 (m, 3H), 7.35 – 7.26 (m, 8H), 7.20 – 7.13 (m, 3H), 7.02 (dt, *J* = 7.8, 6.2 Hz, 1H), 4.95 (s, 1H), 4.37 – 4.30 (m, 1H), 3.58 – 3.49 (m, 1H), 3.28 – 3.12 (m, 2H), 3.11 – 2.96 (m, 1H), 2.40 (s, 3H). <sup>13</sup>C NMR (101 MHz, CDCl<sub>3</sub>) δ 193.2, 190.5, 162.3, 159.7, 143.5, 134.5, 134.2, 133.0, 132.8, 132.3, 129.6, 128.9, 128.3, 127.9, 127.5, 127.2, 127.0, 126.9, 126.6, 123.4, 115.9, 70.9, 63.7, 52.0, 41.8, 41.6, 20.7. HRMS (ESI) calcd for C<sub>33</sub>H<sub>28</sub>FN<sub>2</sub>O<sub>4</sub>S<sup>+</sup> [M+H]<sup>+</sup> 567.1754, found 567.1760.

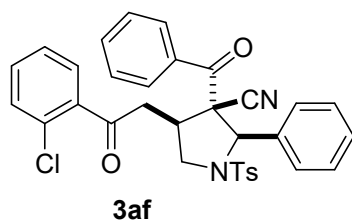

White solid, 82% yield, 8:1 dr. Purified by flash chromatography (12% EtOAc/PE). mp = 136-137 °C; <sup>1</sup>H NMR (500 MHz, CDCl<sub>3</sub>) δ 7.60 (t, *J* = 10.2 Hz, 2H), 7.47 – 7.37 (m, 2H), 7.33 – 7.26 (m, 11H), 7.24 – 7.20 (m, 1H), 7.18 (t, *J* = 7.9 Hz, 2H), 4.92 (s, 1H), 4.31 (dd, *J* = 11.7, 6.5 Hz, 1H), 3.63 – 3.49 (m, 1H), 3.25 – 3.19 (m, 1H), 3.18 – 3.16 (m, 1H), 3.06 – 2.98 (m, 1H), 2.41 (s, 3H). <sup>13</sup>C NMR (101 MHz, CDCl<sub>3</sub>) δ 198.1, 190.3, 143.4, 136.9, 134.5, 134.1, 132.9, 132.3, 131.4, 130.0, 129.7, 129.0, 128.4, 128.3, 128.1, 127.6, 127.2, 127.0, 126.9, 126.1, 115.9, 70.8, 63.6, 51.8, 41.7, 41.1, 20.7. HRMS (ESI) calcd for C<sub>33</sub>H<sub>28</sub>ClN<sub>2</sub>O<sub>4</sub>S<sup>+</sup> [M+H]<sup>+</sup> 583.1458, found 583.1454.

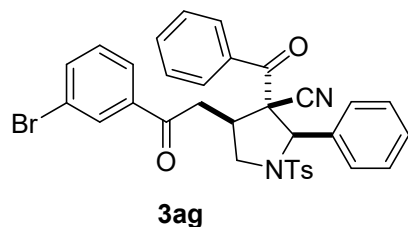

White solid, 74% yield, 9:1 dr. Purified by flash chromatography (12% EtOAc/PE). mp = 125-126 °C; <sup>1</sup>H NMR (400 MHz, CDCl<sub>3</sub>) δ 7.89 (s, 1H), 7.72 – 7.66 (m, 1H), 7.65 – 7.58 (m, 3H), 7.47 – 7.37 (m, 2H), 7.32 – 7.28 (m, 7H), 7.27 – 7.23 (m, 2H), 7.20 – 7.15 (m, 2H), 4.87 (s, 1H), 4.33 (dd, *J* = 11.7, 7.4 Hz, 1H), 3.52 (t, *J* = 11.3 Hz, 1H), 3.30 – 3.16 (m, 1H), 3.15 – 3.05 (m, 1H), 3.04 – 2.94 (m, 1H), 2.40 (s, 3H). <sup>13</sup>C

NMR (101 MHz, CDCl<sub>3</sub>)  $\delta$  195.5, 191.4, 146.5, 144.4, 139.6, 135.6, 135.2, 134.5, 133.9, 133.4, 130.0, 129.4, 129.0, 128.7, 128.6, 128.5, 128.3, 128.1, 128.0, 127.3, 117.1, 71.9, 64.9, 53.1, 42.7, 38.1, 21.7. HRMS (ESI) calcd for C<sub>33</sub>H<sub>28</sub>BrN<sub>2</sub>O<sub>4</sub>S<sup>+</sup> [M+H]<sup>+</sup> 627.0953, found 627.0952.

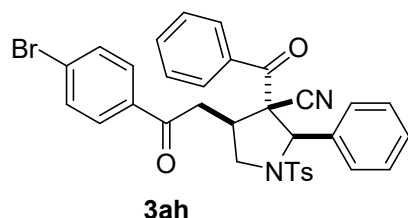

White solid, 85% yield, 8:1 dr. Purified by flash chromatography (12% EtOAc/PE). mp = 99-100 °C; <sup>1</sup>H NMR (400 MHz, CDCl<sub>3</sub>)  $\delta$  7.85 – 7.83 (m, 1H), 7.64 – 7.62 (m, 1H), 7.59 – 7.50 (m, 4H), 7.42 – 7.36 (m, 3H), 7.34 – 7.32 (m, 3H), 7.31 – 7.28 (m, 4H), 7.22 – 7.15 (m, 2H), 4.91 (s, 1H), 4.35 (dd, *J* = 11.8, 7.3 Hz, 1H), 3.65 – 3.46 (m, 1H), 3.32 – 3.22 (m, 1H), 3.22 – 3.12 (m, 1H), 3.12 – 3.02 (m, 1H), 2.39 (s, 3H). <sup>13</sup>C NMR (101 MHz, CDCl<sub>3</sub>)  $\delta$  194.7, 191.2, 144.5, 137.5, 136.6, 135.5, 135.0, 134.0, 133.4, 131.1, 130.4, 129.5, 128.6, 128.3, 128.1, 127.9, 126.6, 123.2, 117.0, 71.9, 64.6, 52.9, 42.4, 38.1, 21.7. HRMS (ESI) calcd for C<sub>33</sub>H<sub>28</sub>BrN<sub>2</sub>O<sub>4</sub>S<sup>+</sup> [M+H]<sup>+</sup> 627.0953, found 627.0951.

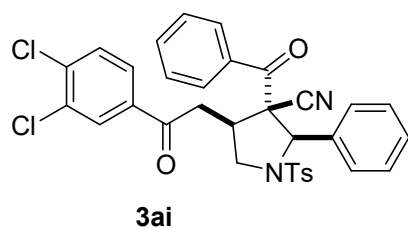

White solid, 74% yield, 10:1 dr. Purified by flash chromatography (12% EtOAc/PE). mp = 190-191 °C; <sup>1</sup>H NMR (400 MHz, CDCl<sub>3</sub>)  $\delta$  7.90 – 7.79 (m, 1H), 7.64 – 7.53 (m, 3H), 7.51 – 7.37 (m, 3H), 7.35 – 7.23 (m, 8H), 7.22 – 7.15 (m, 2H), 4.86 (s, 1H), 4.32 (dd, *J* = 11.7, 7.5 Hz, 1H), 3.52 (t, *J* = 11.3 Hz, 1H), 3.31 – 3.17 (m, 1H), 3.13 – 3.03 (m, 1H), 3.03 – 2.94 (m, 1H), 2.40 (s, 3H). <sup>13</sup>C NMR (101 MHz, CDCl<sub>3</sub>)  $\delta$  193.9, 191.1, 144.5, 138.5, 135.4, 135.3, 134.9, 134.1, 133.6, 133.4, 130.9, 130.03, 129.99,



129.5, 128.6, 128.3, 128.1, 127.9, 127.4, 127.1, 117.0, 71.8, 64.6, 52.8, 42.3, 38.1, 21.7. HRMS (ESI) calcd for  $C_{33}H_{27}Cl_2N_2O_4S^+$   $[M+H]^+$  617.1069, found 617.1066.

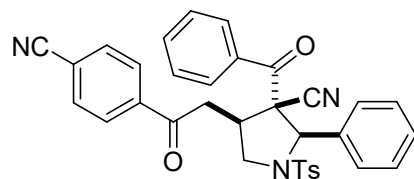

**3aj**

White solid, 86% yield, 11:1 dr. Purified by flash chromatography (12% EtOAc/PE). mp = 100-101 °C;  $^1H$  NMR (400 MHz,  $CDCl_3$ )  $\delta$  7.91 – 7.79 (m, 2H), 7.72 – 7.63 (m, 2H), 7.62 – 7.55 (m, 2H), 7.46 – 7.38 (m, 1H), 7.35 – 7.23 (m, 9H), 7.21 – 7.14 (m, 2H), 4.86 (s, 1H), 4.35 (dd,  $J$  = 11.6, 7.5 Hz, 1H), 3.52 (t,  $J$  = 11.2 Hz, 1H), 3.34 – 3.23 (m, 1H), 3.20 – 3.10 (m, 1H), 3.09 – 2.99 (m, 1H), 2.40 (s, 3H).  $^{13}C$  NMR (101 MHz,  $CDCl_3$ )  $\delta$  194.8, 191.0, 144.5, 138.6, 135.3, 134.8, 134.1, 133.5, 132.6, 130.0, 129.54, 129.51, 128.6, 128.5, 128.3, 128.1, 127.9, 117.7, 117.1, 117.0, 71.7, 64.5, 52.7, 42.2, 38.4, 21.7. HRMS (ESI) calcd for  $C_{34}H_{28}N_3O_4S^+$   $[M+H]^+$  574.1801, found 574.1805.

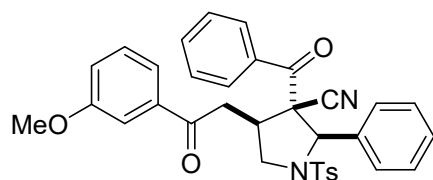

**3ak**

White solid, 79% yield, 10:1 dr. Purified by flash chromatography (12% EtOAc/PE). mp = 127-128 °C;  $^1H$  NMR (400 MHz,  $CDCl_3$ )  $\delta$  7.66 – 7.56 (m, 2H), 7.46 – 7.38 (m, 2H), 7.34 – 7.30 (m, 4H), 7.30 – 7.26 (m, 6H), 7.25 – 7.20 (m, 1H), 7.20 – 7.13 (m, 2H), 7.06 – 6.98 (m, 1H), 4.89 (s, 1H), 4.33 (dd,  $J$  = 11.8, 7.4 Hz, 1H), 3.75 (s, 3H), 3.53 (t,  $J$  = 11.2 Hz, 1H), 3.29 – 3.17 (m, 1H), 3.16 – 3.07 (m, 1H), 3.06 – 2.96 (m, 1H), 2.39 (s, 3H).  $^{13}C$  NMR (101 MHz,  $CDCl_3$ )  $\delta$  195.9, 191.4, 159.9, 144.4, 137.1, 135.6, 135.1, 133.9, 133.4, 130.0, 129.8, 129.7, 129.4, 128.6, 128.3, 128.1, 127.9, 120.7, 120.3, 117.0, 112.2, 71.8, 64.8, 55.5, 53.0, 42.7, 38.1, 21.7. HRMS (ESI) calcd for  $C_{34}H_{31}N_2O_5S^+$   $[M+H]^+$  579.1954, found 579.1954.

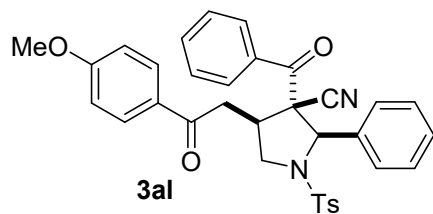

White solid, 80% yield, 8.5:1 dr. Purified by flash chromatography (12 % EtOAc/PE). mp = 127-128 °C; <sup>1</sup>H NMR (500 MHz, CDCl<sub>3</sub>) δ 7.64 (dd, *J* = 20.5, 8.2 Hz, 4H), 7.46 – 7.37 (m, 2H), 7.33 – 7.29 (m, 5H), 7.28 (s, 2H), 7.16 (dt, *J* = 11.3, 7.0 Hz, 5H), 4.91 (s, 1H), 4.32 (dd, *J* = 11.8, 7.4 Hz, 1H), 3.53 (t, *J* = 11.3 Hz, 1H), 3.27 – 3.17 (m, 1H), 3.12 (dd, *J* = 17.4, 9.1 Hz, 1H), 3.00 (dd, *J* = 17.4, 4.6 Hz, 1H), 2.39 (s, 3H), 2.31 (s, 3H). <sup>13</sup>C NMR (101 MHz, CDCl<sub>3</sub>) δ 195.9, 191.4, 159.9, 144.4, 137.1, 135.6, 135.1, 133.9, 133.4, 130.0, 129.8, 129.4, 128.6, 128.3, 128.1, 127.9, 120.7, 120.3, 117.1, 112.2, 71.8, 64.8, 55.5, 42.7, 38.1, 21.7. HRMS (ESI) calcd for C<sub>34</sub>H<sub>31</sub>N<sub>2</sub>O<sub>5</sub>S<sup>+</sup> [M+H]<sup>+</sup> 579.1954, found 579.1954.

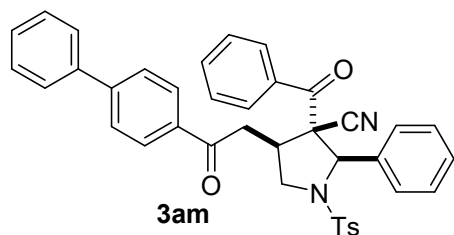

White solid, 86% yield, 12.5:1 dr. Purified by flash chromatography (12% EtOAc/PE). mp = 160-162 °C; <sup>1</sup>H NMR (500 MHz, CDCl<sub>3</sub>) δ 7.86 – 7.81 (m, 2H), 7.66 – 7.60 (m, 2H), 7.59 – 7.55 (m, 2H), 7.55 – 7.50 (m, 2H), 7.45 – 7.42 (m, 1H), 7.41 – 7.36 (m, 3H), 7.35 – 7.28 (m, 9H), 7.20 – 7.16 (m, 2H), 4.92 (s, 1H), 4.35 (dd, *J* = 11.8, 7.4 Hz, 1H), 3.59 – 3.50 (m, 1H), 3.30 – 3.22 (m, 1H), 3.22 – 3.12 (m, 1H), 3.11 – 3.02 (m, 1H), 2.39 (s, 3H). <sup>13</sup>C NMR (126 MHz, CDCl<sub>3</sub>) δ 194.5, 190.4, 145.4, 143.4, 138.5, 134.6, 134.2, 133.5, 132.9, 132.4, 129.0, 128.38, 128.36, 128.1, 128.0, 127.63, 127.56, 127.5, 127.4, 127.3, 127.0, 126.9, 126.3, 126.2, 116.0, 70.8, 63.8, 52.0, 41.7, 37.0, 20.7. HRMS (ESI) calcd for C<sub>39</sub>H<sub>33</sub>N<sub>2</sub>O<sub>4</sub>S<sup>+</sup> [M+H]<sup>+</sup> 625.2156, found 625.2159.

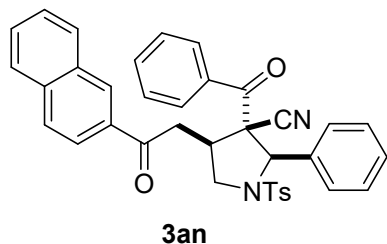

White solid, 81% yield, 8:1 dr. Purified by flash chromatography (12% EtOAc/PE). mp = 162-163 °C; <sup>1</sup>H NMR (500 MHz, CDCl<sub>3</sub>) δ 8.26 (s, 1H), 7.86 – 7.82 (m, 2H), 7.78 (dd, *J* = 8.5, 3.5 Hz, 2H), 7.63 (d, *J* = 8.2 Hz, 2H), 7.52 (dd, *J* = 11.0, 3.9 Hz, 1H), 7.47 (dd, *J* = 11.4, 4.2 Hz, 1H), 7.41 (dd, *J* = 12.0, 4.4 Hz, 1H), 7.35 – 7.30 (m, 5H), 7.28 (t, *J* = 6.9 Hz, 4H), 7.18 (d, *J* = 7.7 Hz, 2H), 4.91 (s, 1H), 4.37 (dd, *J* = 11.8, 6.9 Hz, 1H), 3.64 – 3.53 (m, 1H), 3.29 (ddd, *J* = 22.5, 12.7, 6.4 Hz, 2H), 3.18 (t, *J* = 10.6 Hz, 1H), 2.36 (s, 3H). <sup>13</sup>C NMR (101 MHz, CDCl<sub>3</sub>) δ 194.8, 190.3, 143.4, 134.8, 134.6, 134.1, 132.9, 132.3, 132.1, 131.3, 128.99, 128.95, 128.6, 128.4, 127.95, 127.87, 127.7, 127.6, 127.3, 127.0, 126.9, 126.8, 126.0, 122.4, 116.1, 70.9, 63.8, 52.0, 41.8, 37.0, 20.6. HRMS (ESI) calcd for C<sub>37</sub>H<sub>31</sub>N<sub>2</sub>O<sub>4</sub>S<sup>+</sup> [M+H]<sup>+</sup> 599.2005, found 599.2002.

#### The reaction on the gram-scale of the product

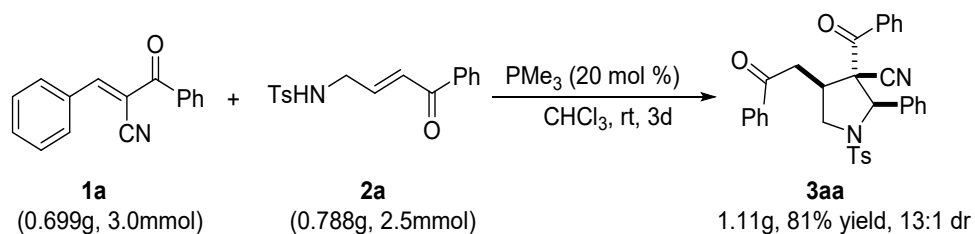

Under argon atmosphere, to a mixture of unsaturated ketones **1** (3.0 mmol), β-sulfonamido-substituted enones **2** (2.5 mmol) and catalyst PMe<sub>3</sub> (20 mol %, 0.5 mmol) in a Schlenk tube, 125 mL of CHCl<sub>3</sub> was added at room temperature. The resulting mixture was stirred until the starting material was completely consumed (monitored by TLC) and then was concentrated to dryness. The residue was purified through flash column chromatography (EtOAc/PE) to afford the corresponding cycloaddition products **3**.

### The reaction on further transformation of the product **3a**

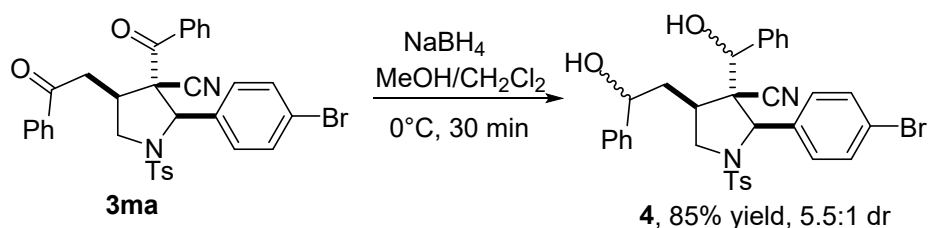

NaBH<sub>4</sub> (0.3 mmol, 12 mg) was added in portions to a solution of **3a** (0.1 mmol, 62.6 mg) in MeOH (1 mL) at 0 °C. The mixture was stirred at 0 °C until the reaction was completed as monitored by TLC (30 min). When **3a** was consumed, H<sub>2</sub>O (3 mL) was added to the reaction tube. The aqueous phase was extracted with DCM. The combined organic layers were dried over Na<sub>2</sub>SO<sub>4</sub>, filtered and concentrated in vacuo. Then the residue was purified by column chromatography to afford compound **7** as a White solid (53.6 mg, 85% yield).

White solid, 85% yield, 5.5:1 dr. Purified by flash chromatography (25% EtOAc/PE). mp = 202-203 °C; <sup>1</sup>H NMR (500 MHz, CDCl<sub>3</sub>) δ 7.47 – 7.34 (m, 2H), 7.33 – 7.14 (m, 9H), 7.13 – 7.05 (m, 5H), 7.01 – 6.85 (m, 2H), 4.94 (s, 1H), 4.40 (d, J = 4.7 Hz, 1H), 4.26 (s, 1H), 4.16 – 3.99 (m, 1H), 3.36 – 3.15 (m, 1H), 3.00 (s, 1H), 2.34 (s, 3H), 2.19 – 2.09 (m, 1H), 2.09 – 1.99 (m, 1H), 1.60 – 1.41 (m, 1H), 1.32 – 1.20 (m, 1H). <sup>13</sup>C NMR (126 MHz, CDCl<sub>3</sub>) δ 142.9, 142.2, 136.6, 136.1, 134.4, 130.3, 130.2, 128.8, 128.6, 128.4, 128.3, 127.9, 127.7, 127.6, 126.9, 126.5, 126.4, 124.5, 121.2, 116.3, 76.3, 76.0, 75.8, 75.7, 71.1, 67.1, 60.5, 59.4, 52.4, 39.6, 37.2, 20.6. HRMS (ESI) calcd for C<sub>33</sub>H<sub>31</sub>BrN<sub>2</sub>O<sub>4</sub>SNa<sup>+</sup> [M+Na]<sup>+</sup> 653.1093, found 653.1096.

# <sup>1</sup>H and <sup>13</sup>C NMR Spectra

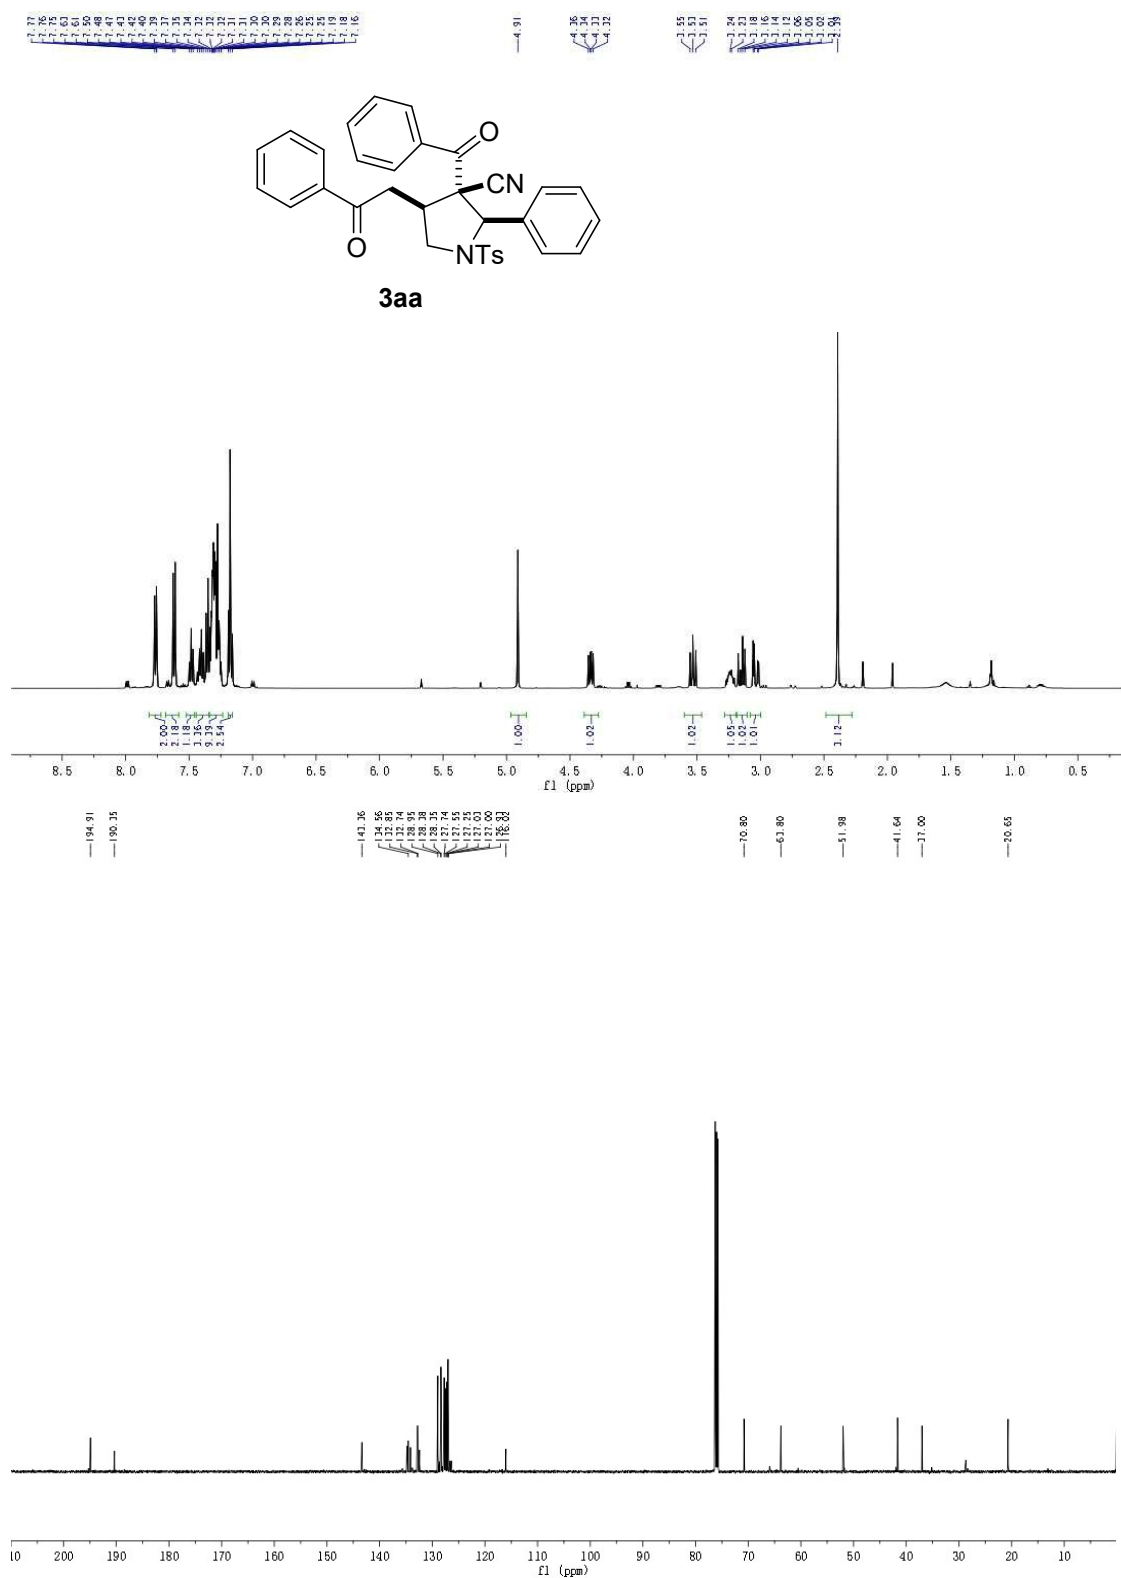

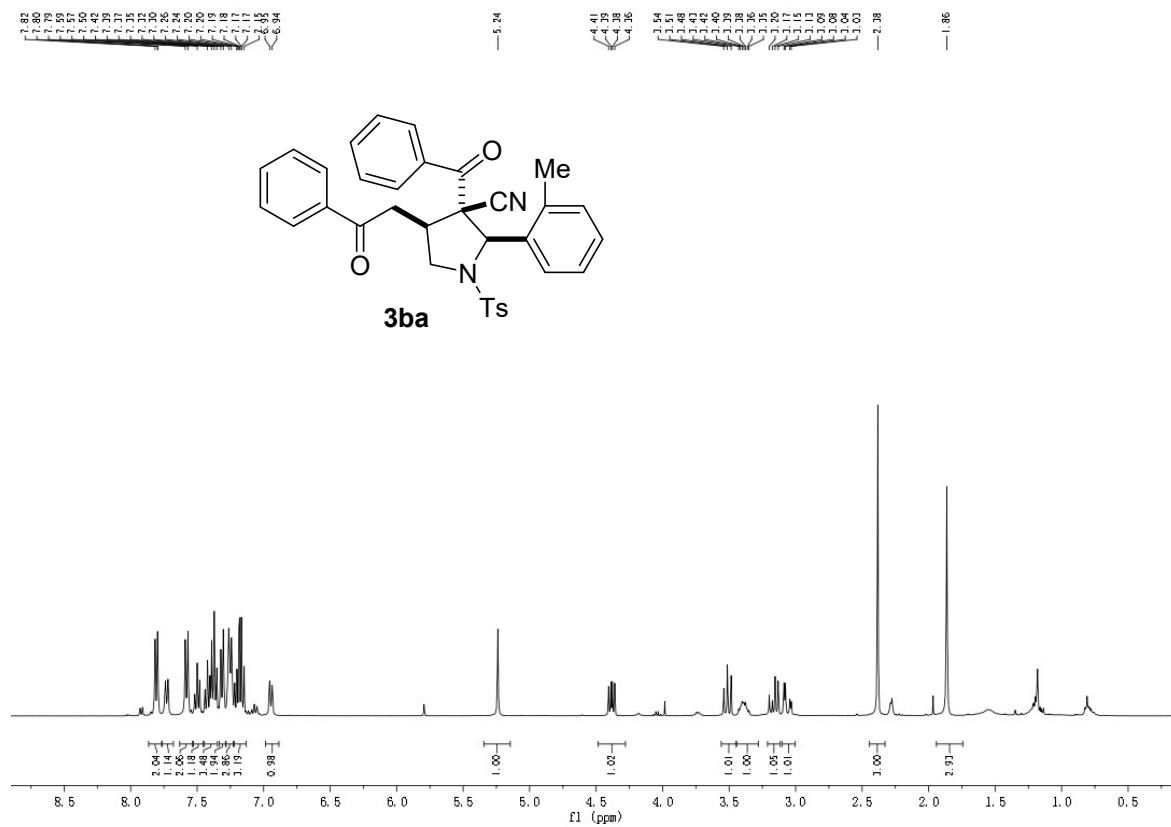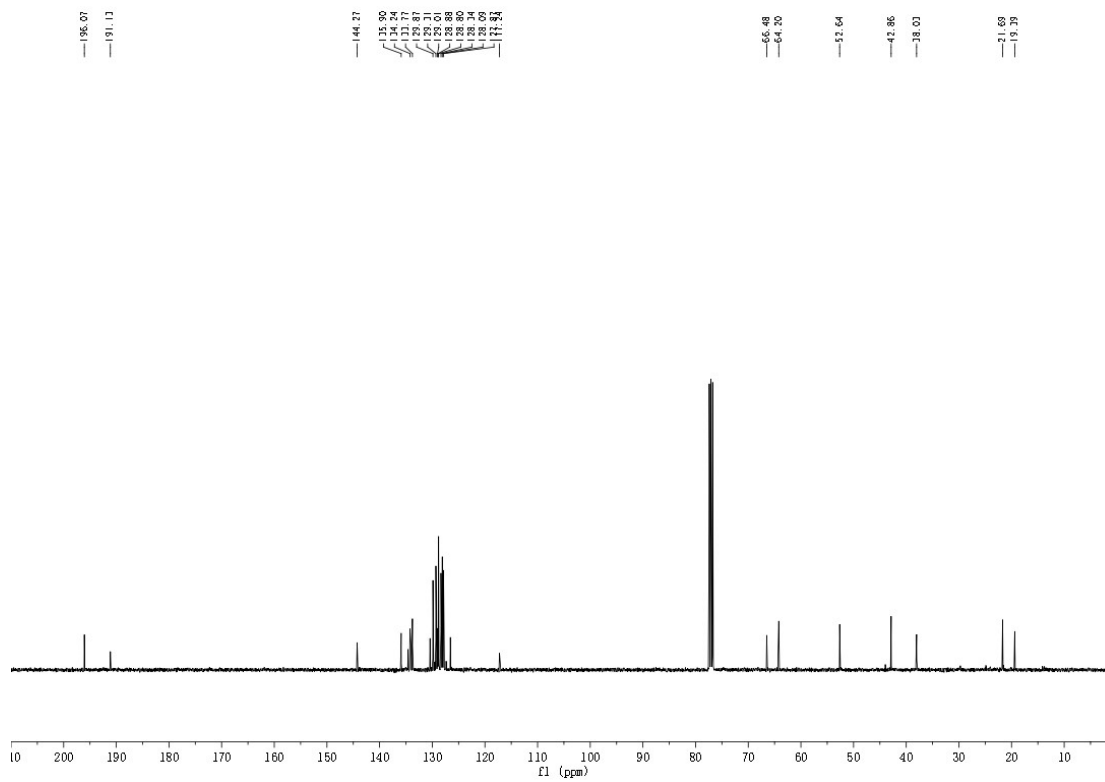

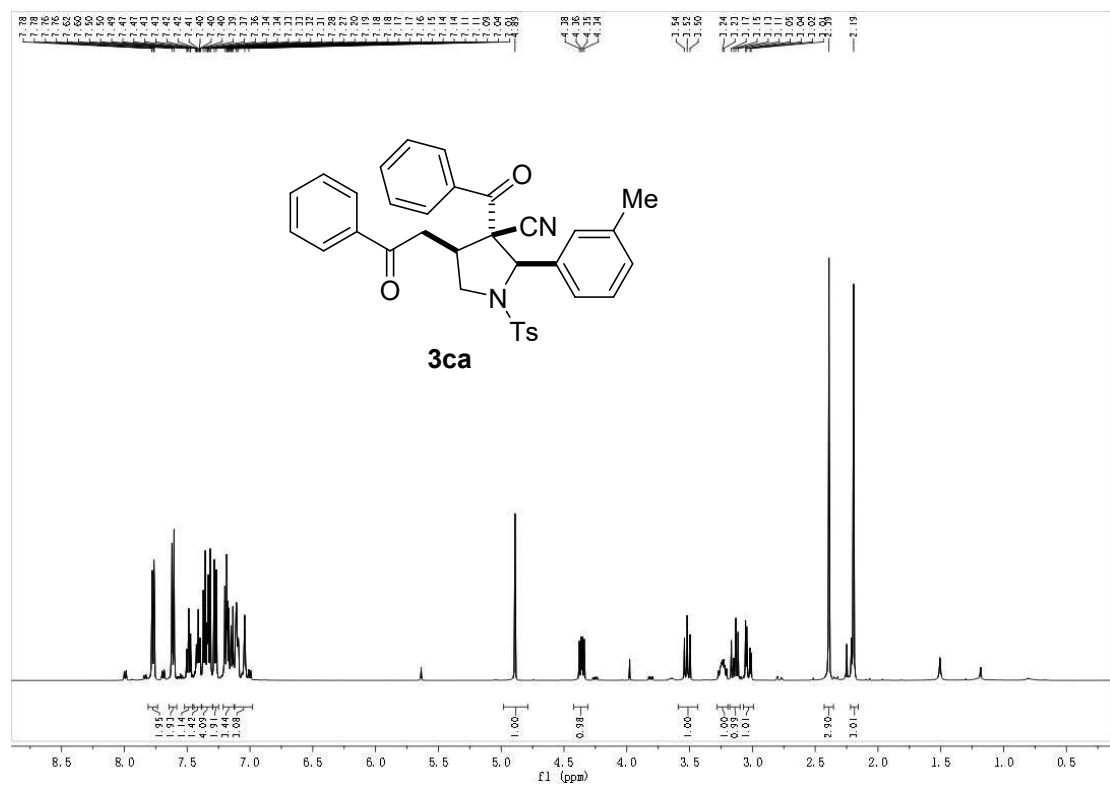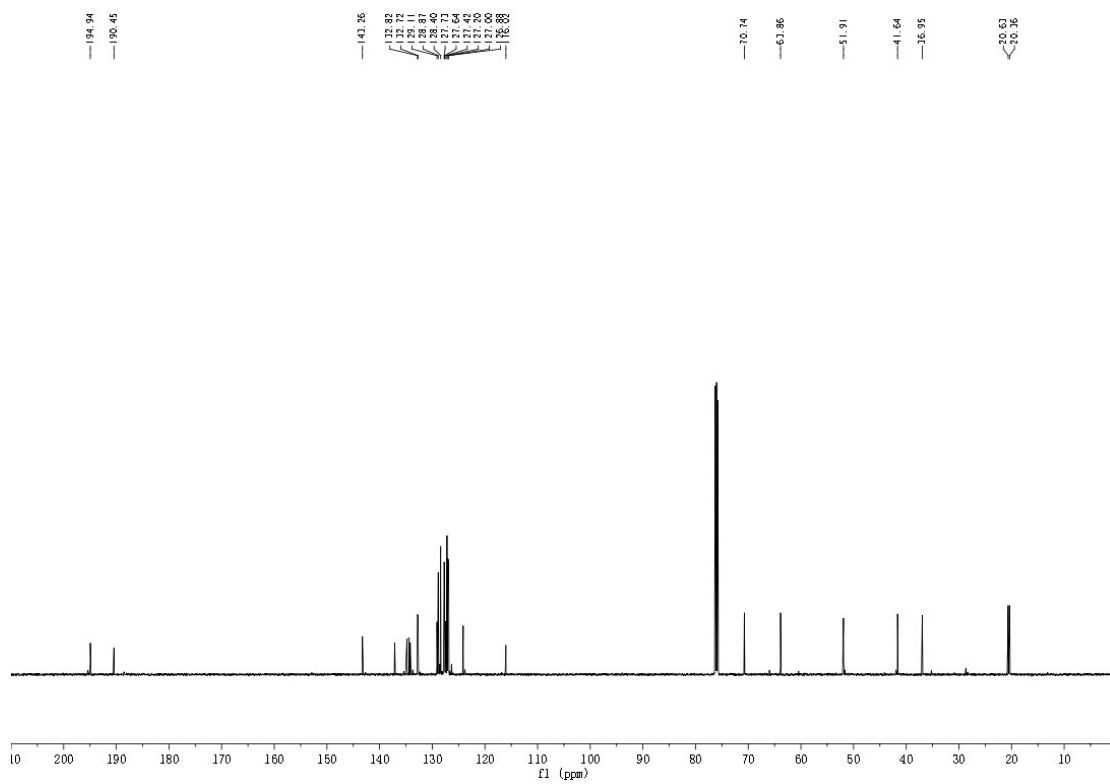

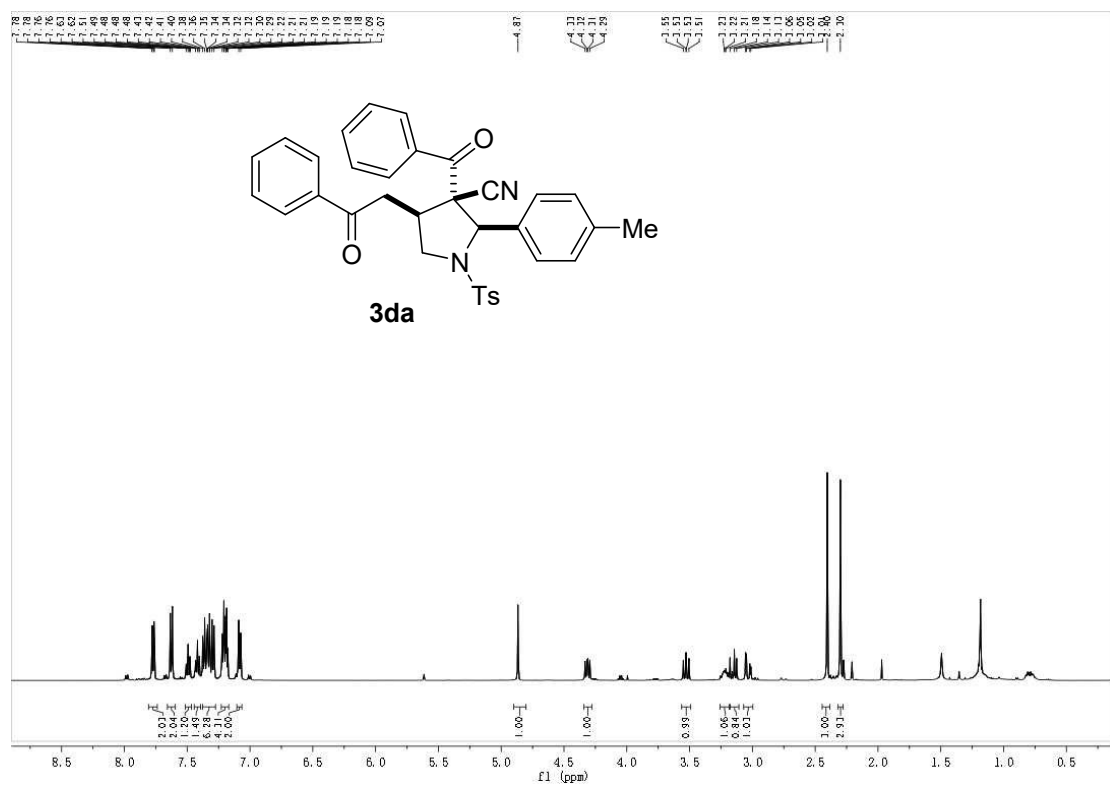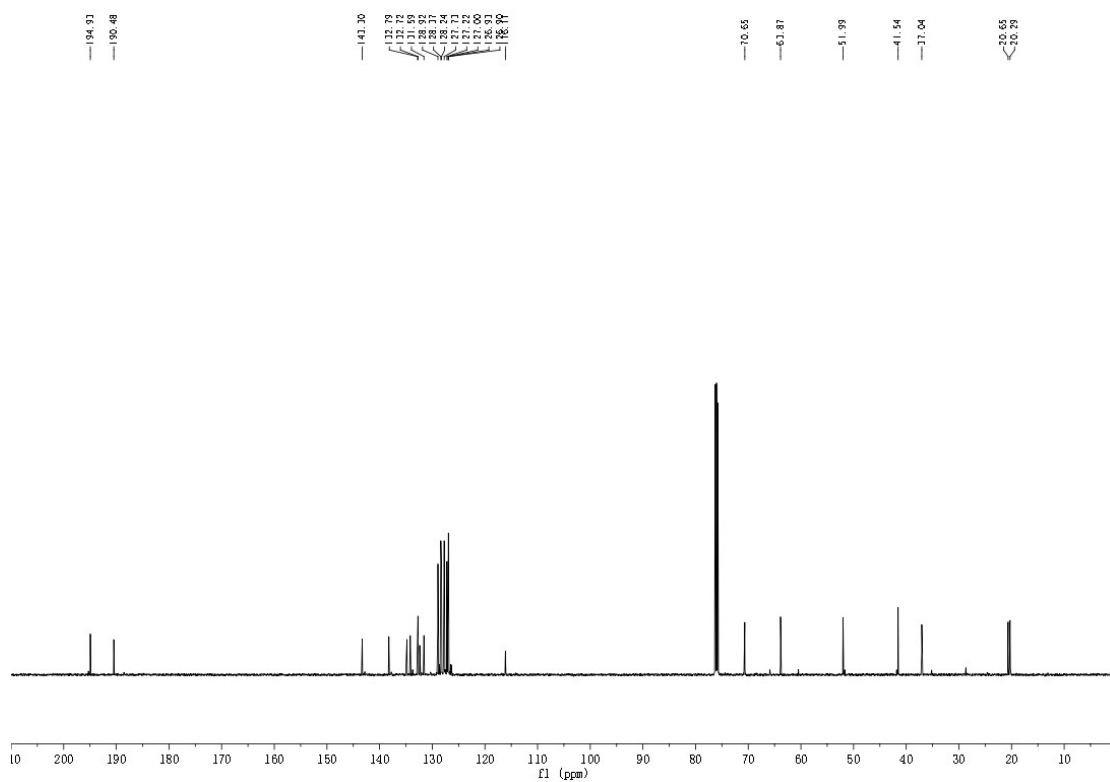



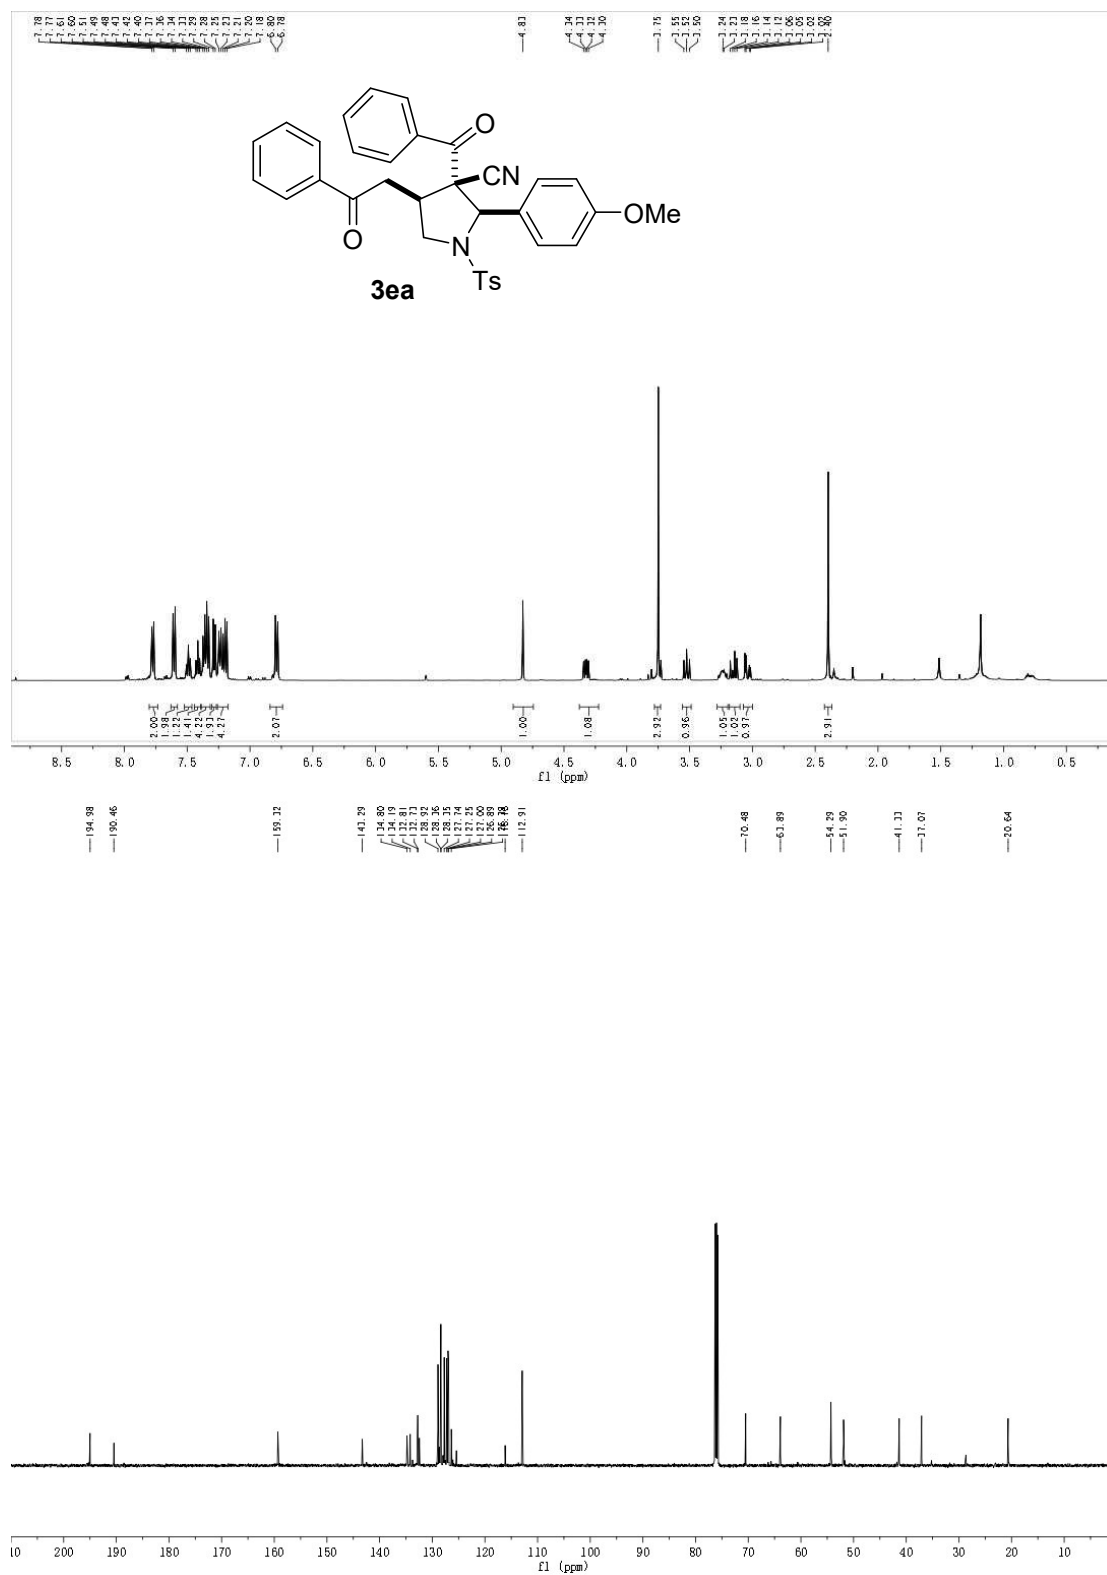

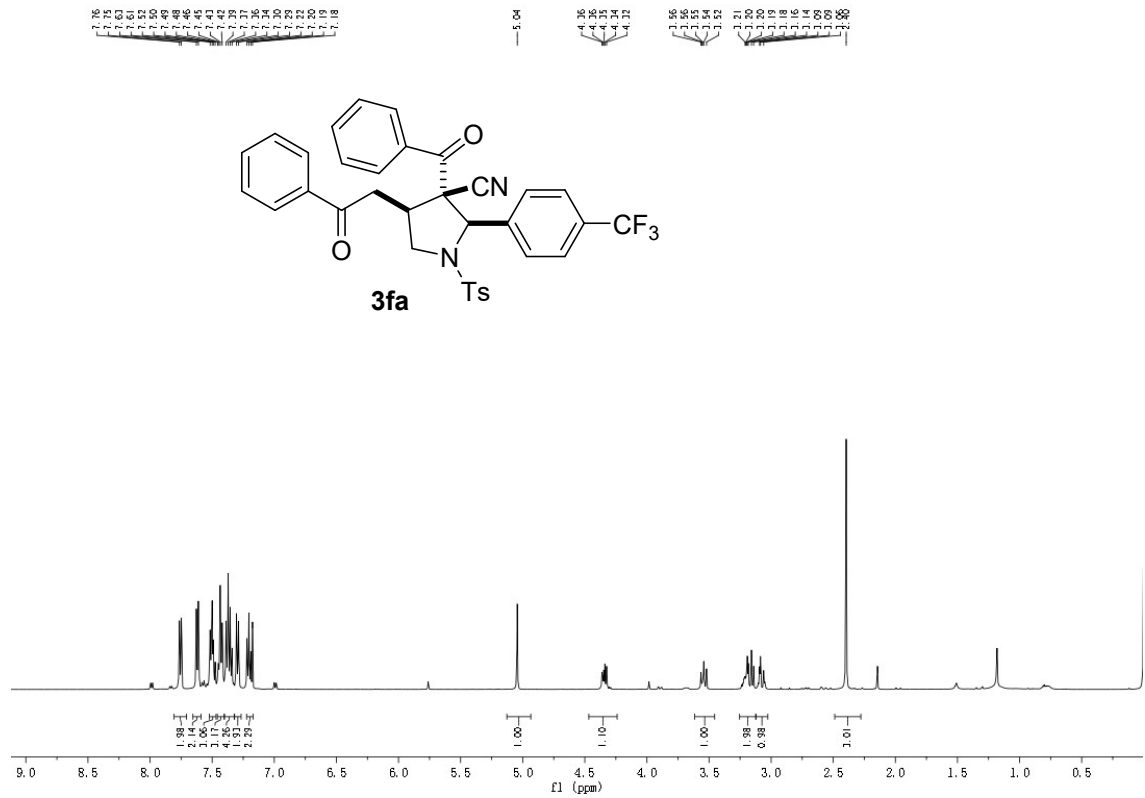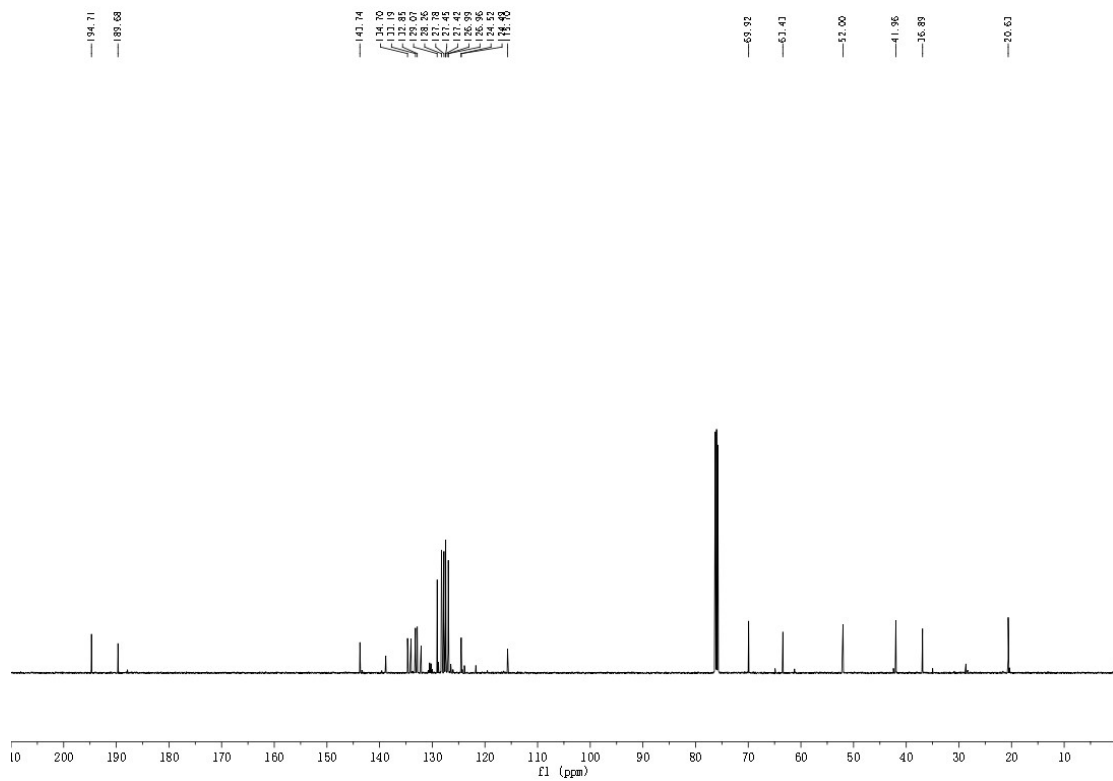

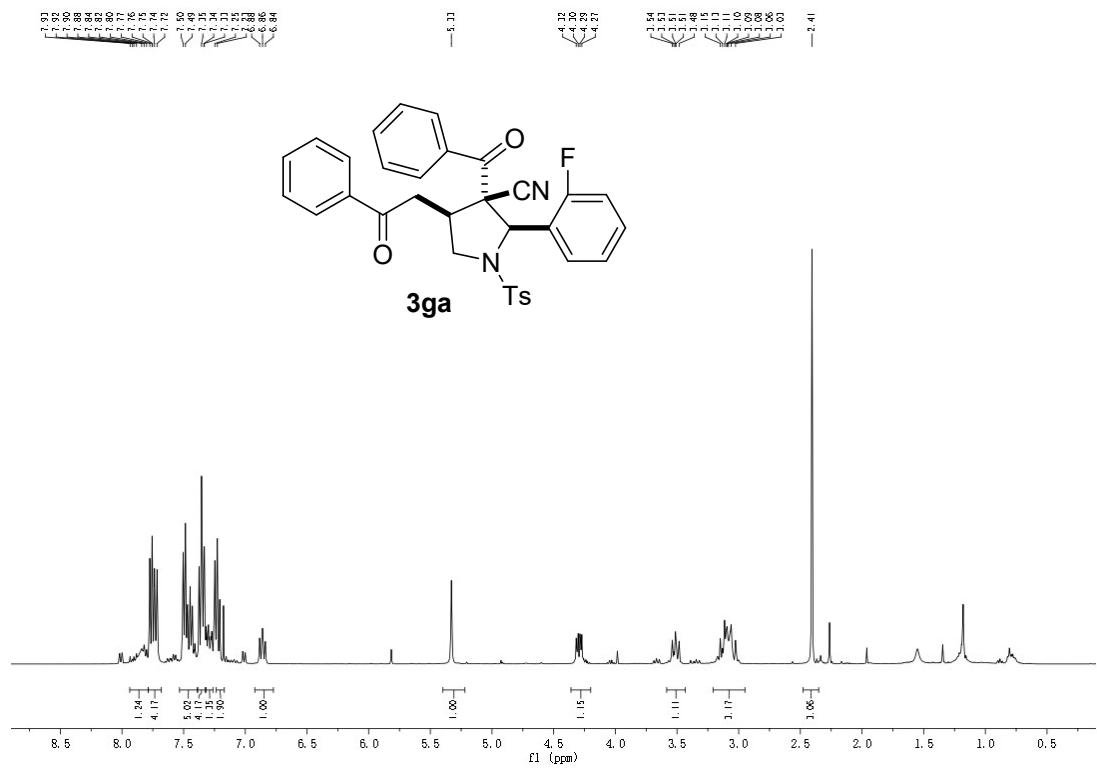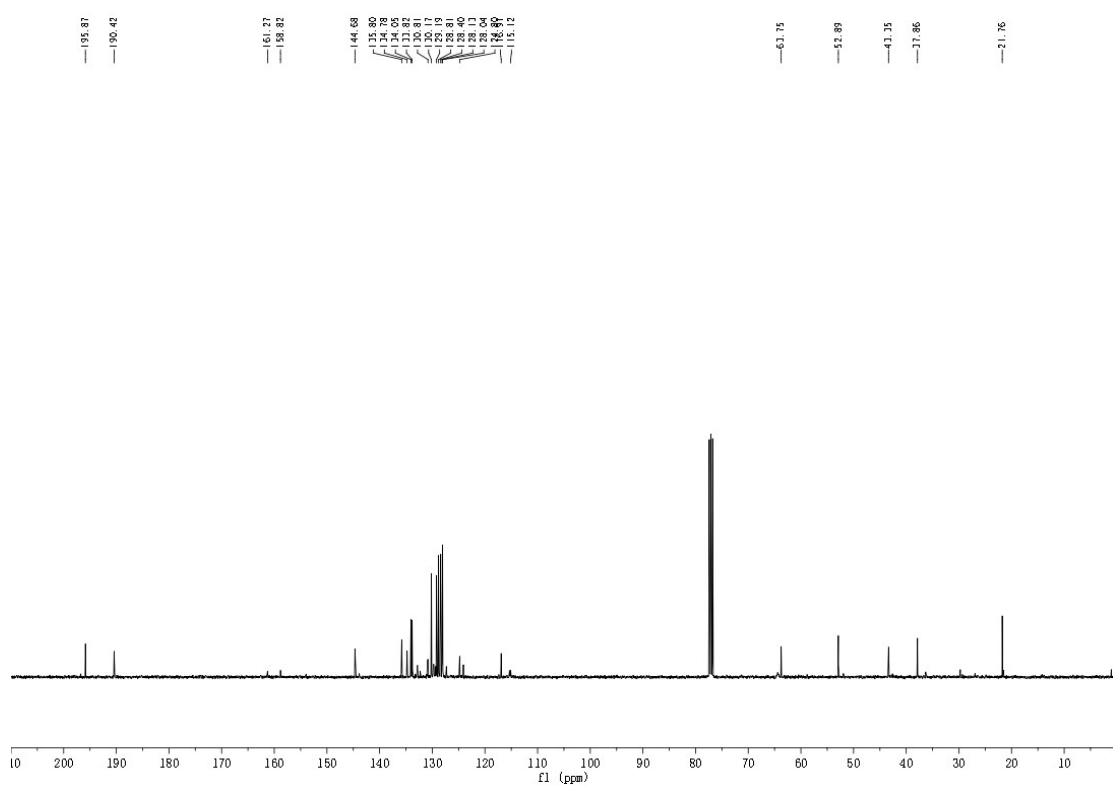

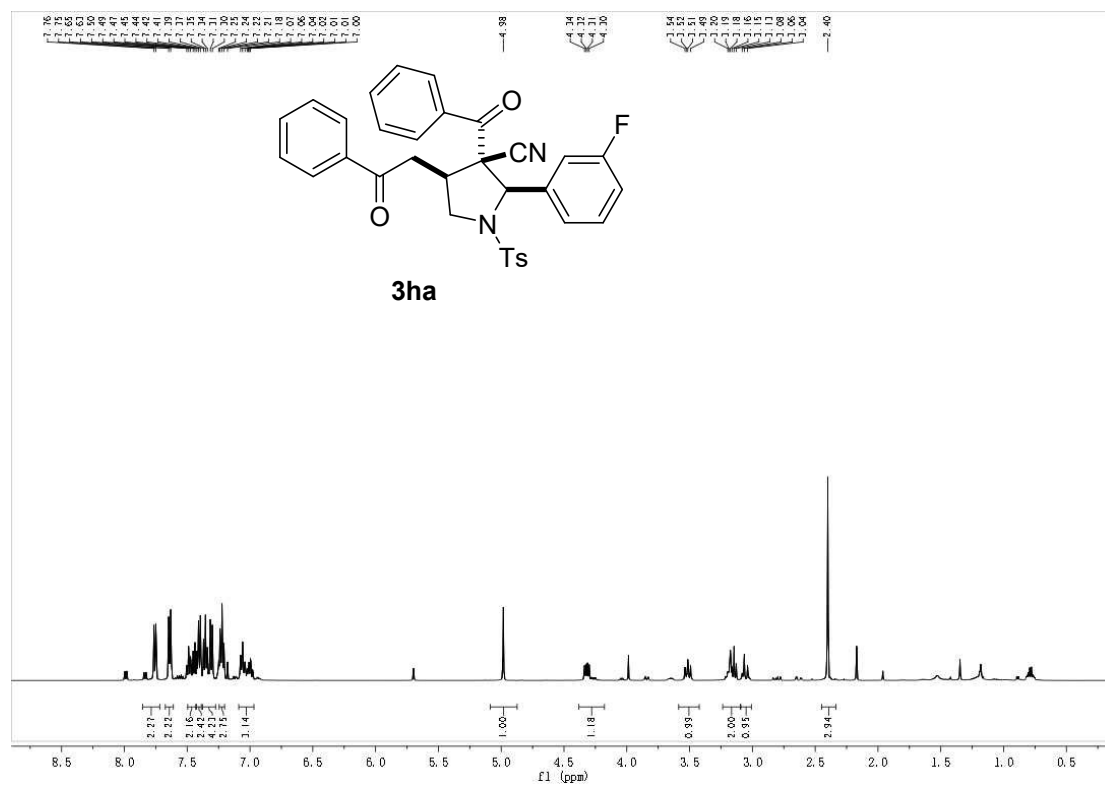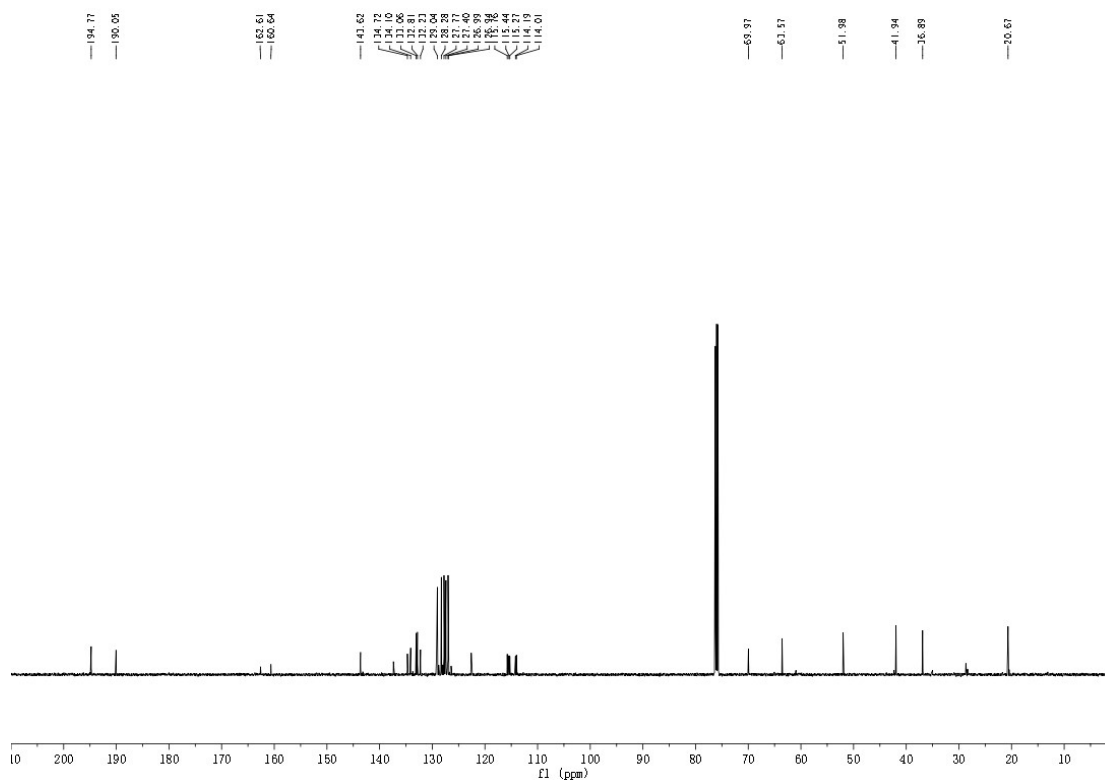

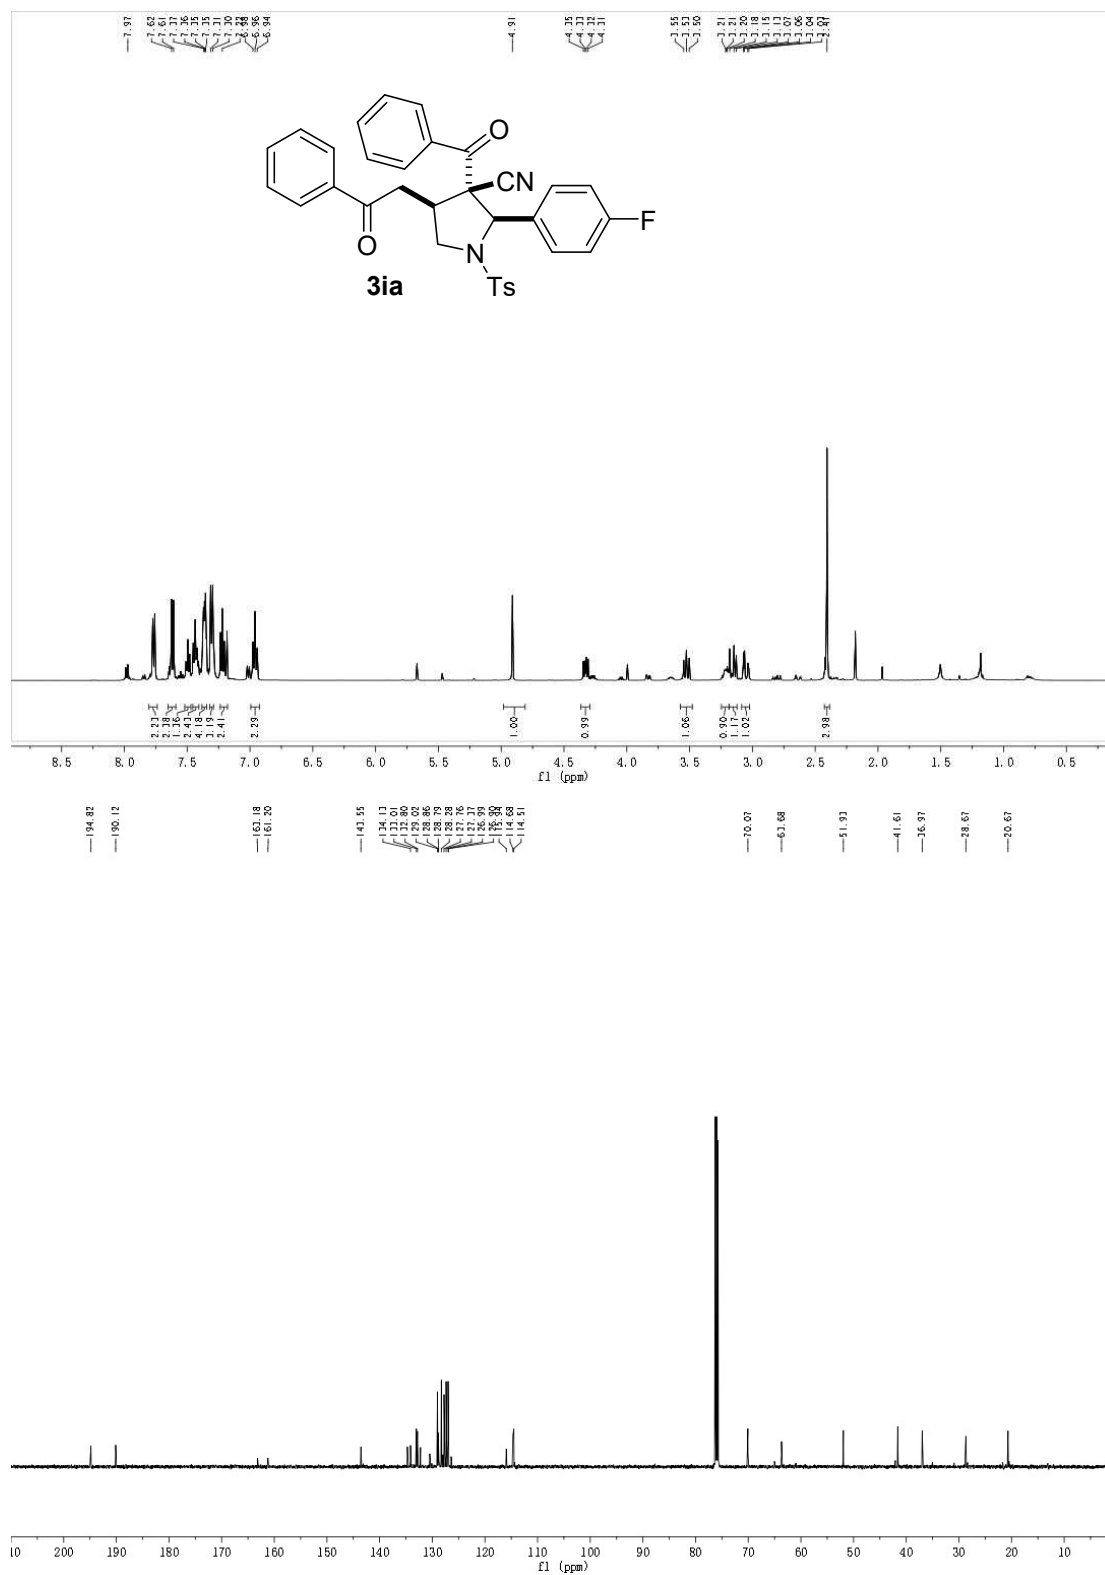

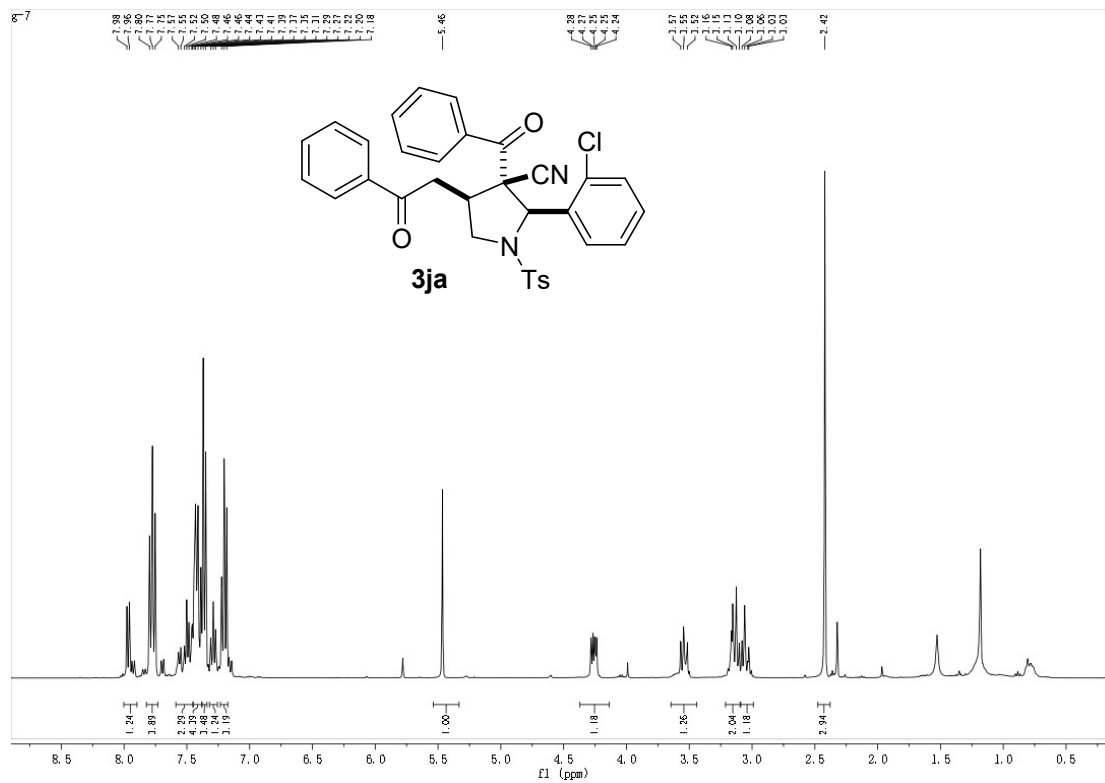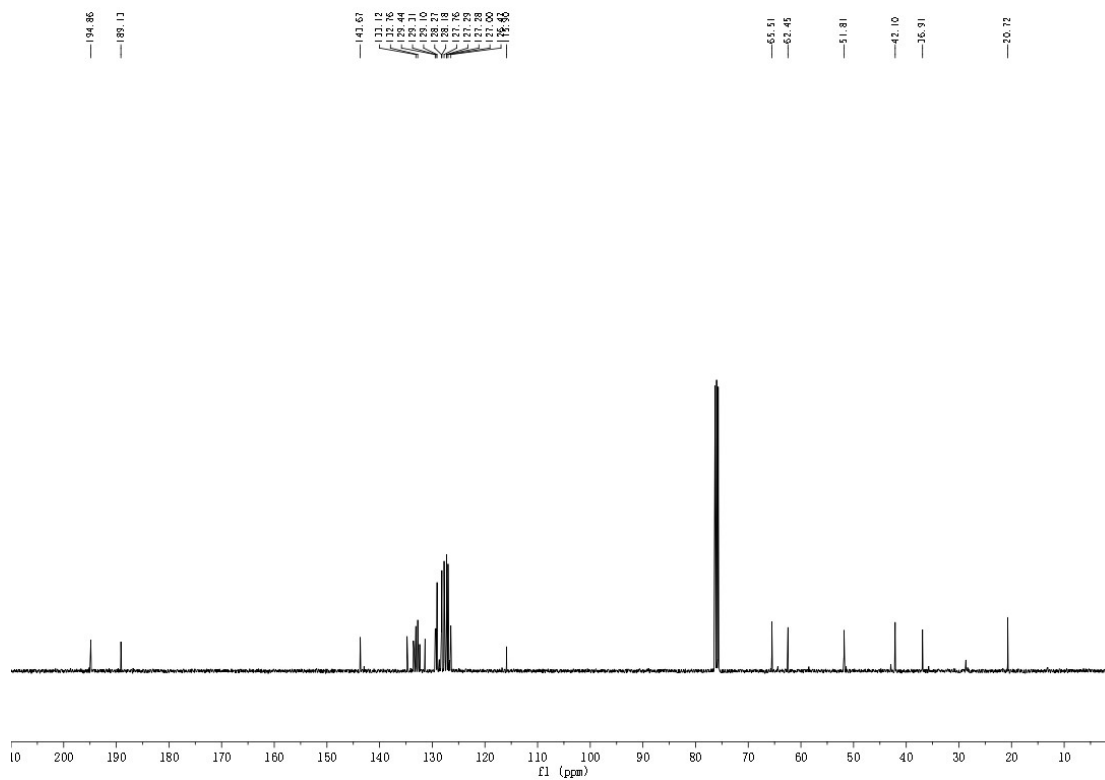

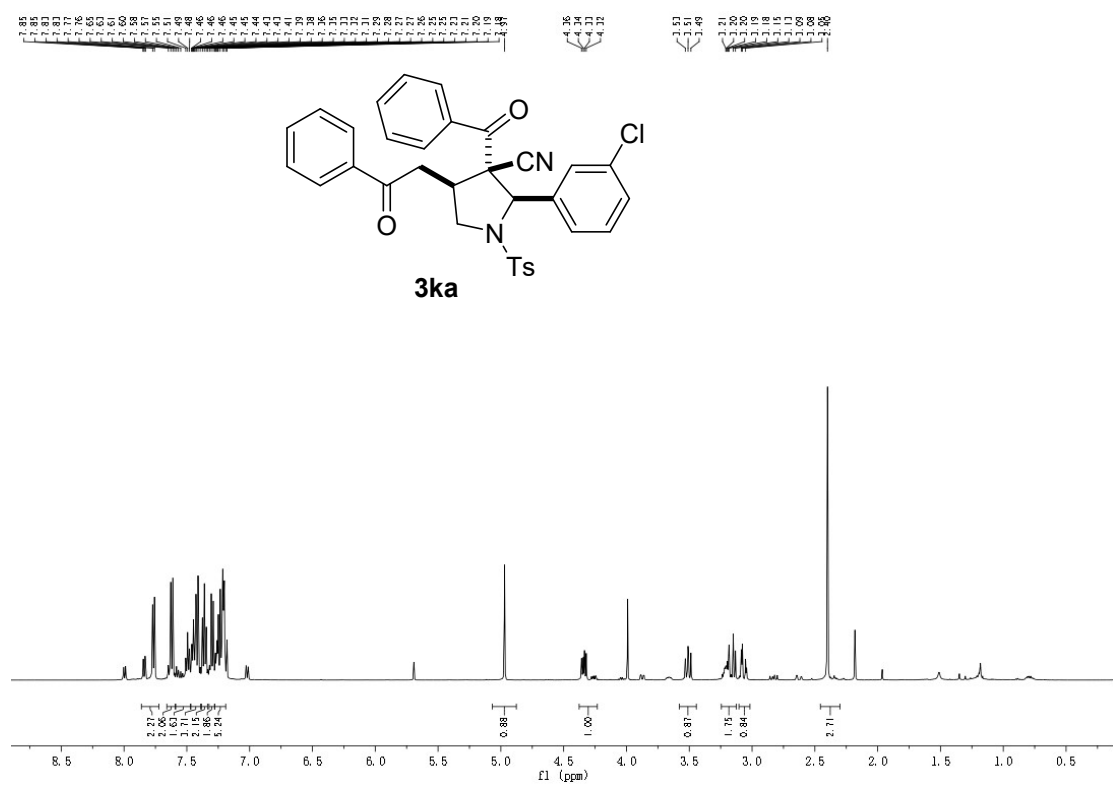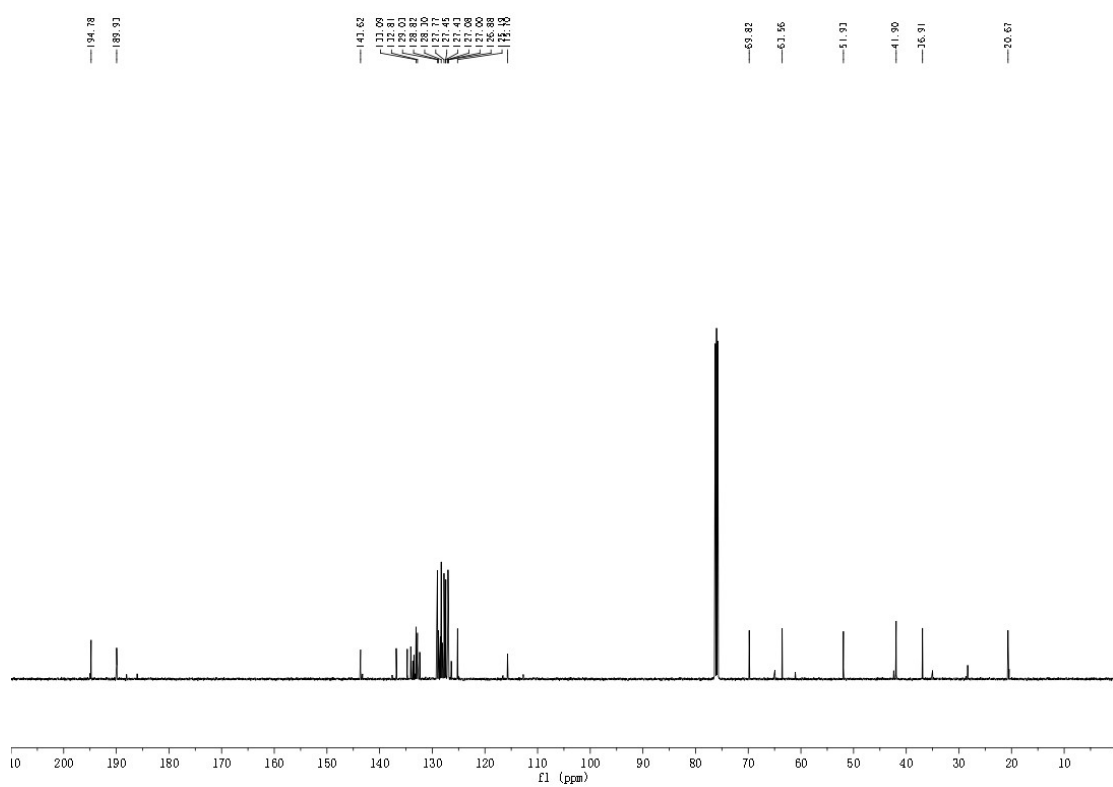

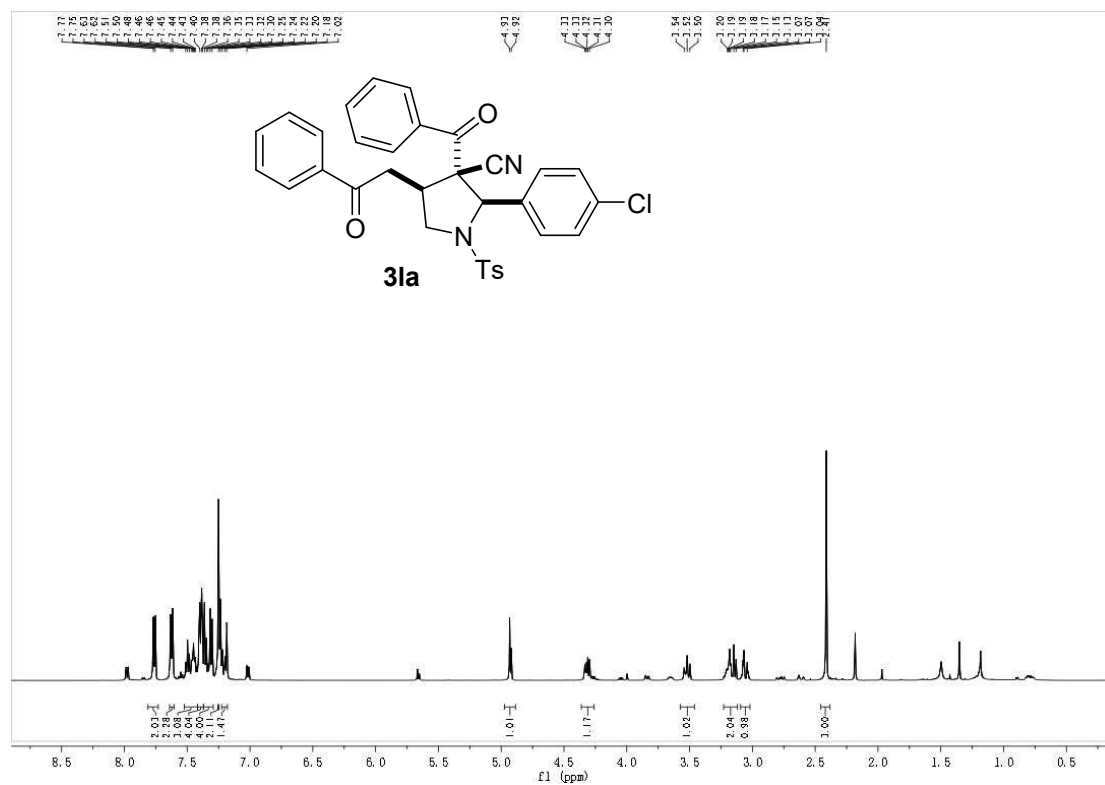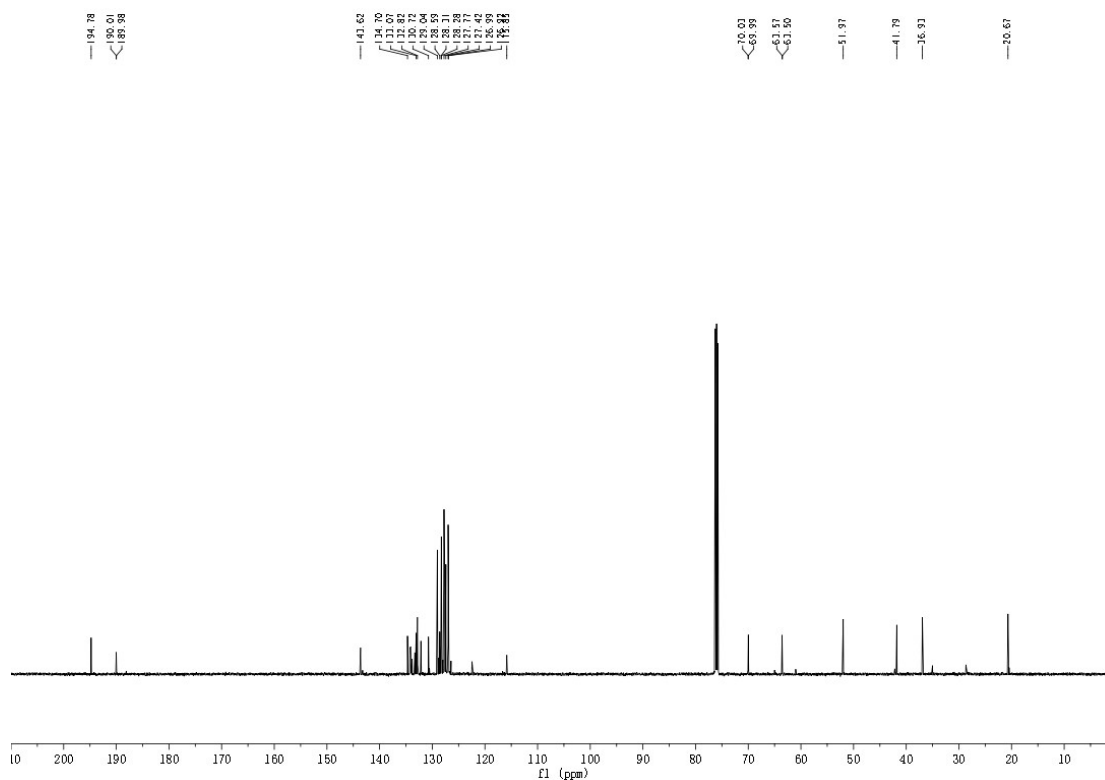



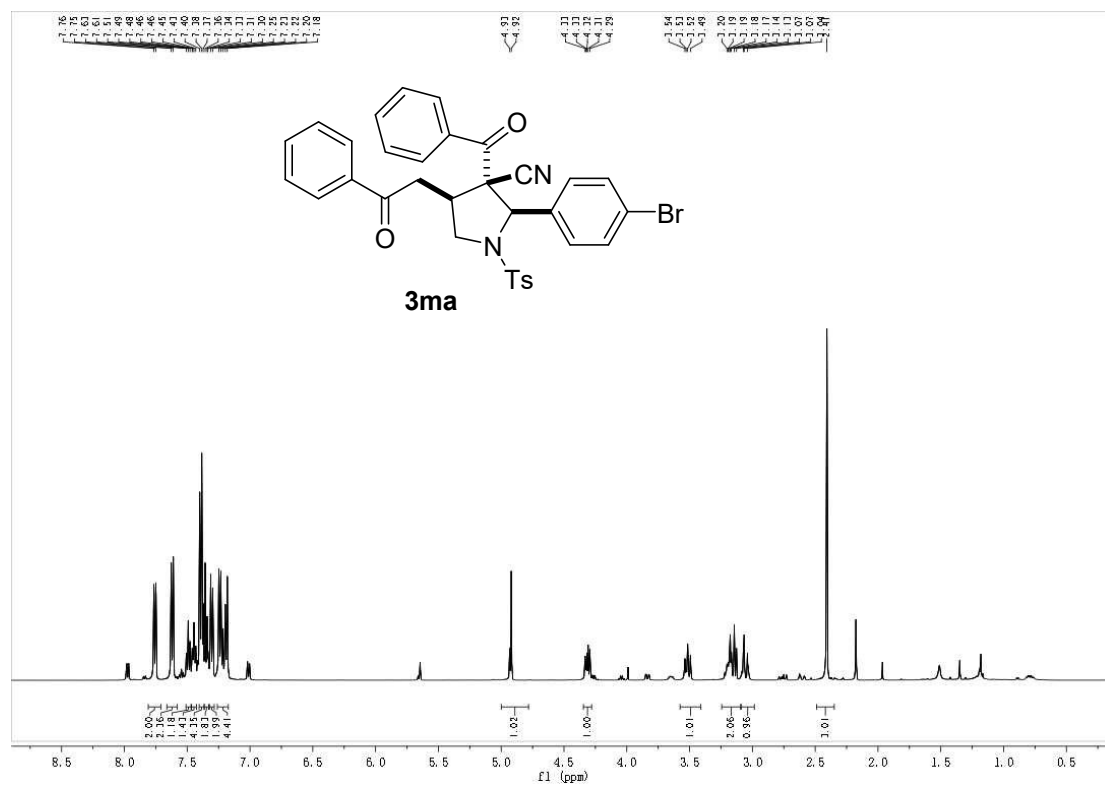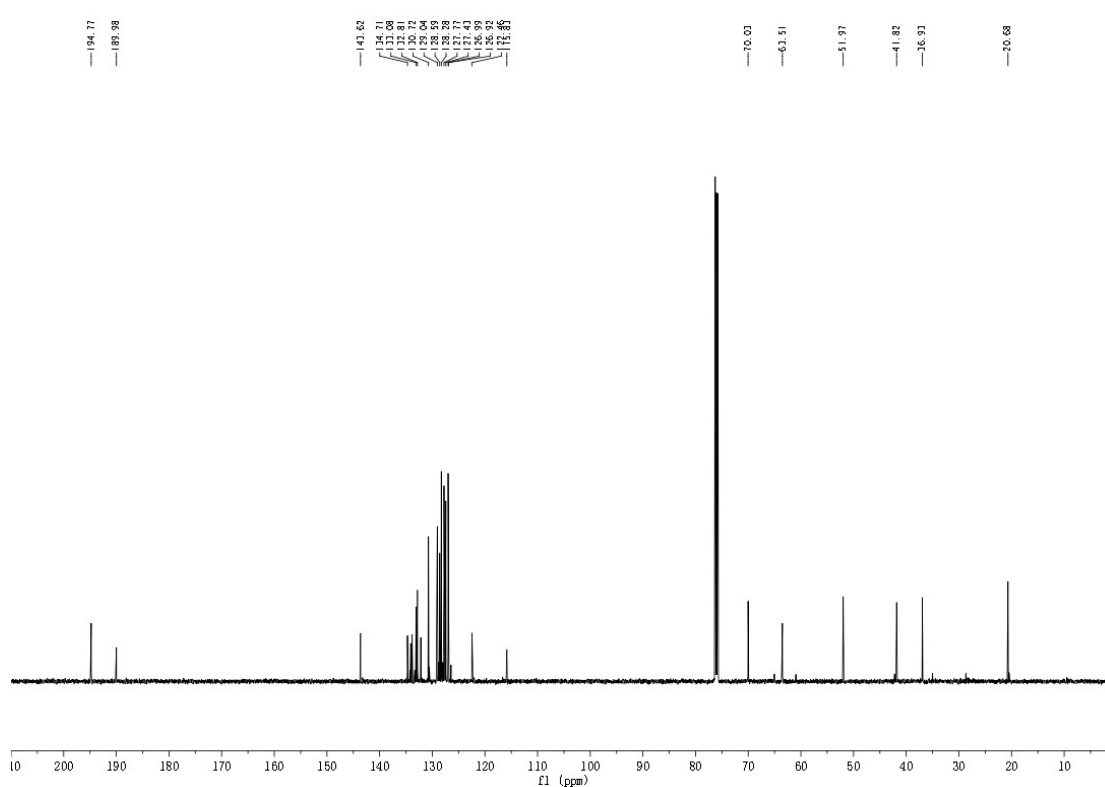

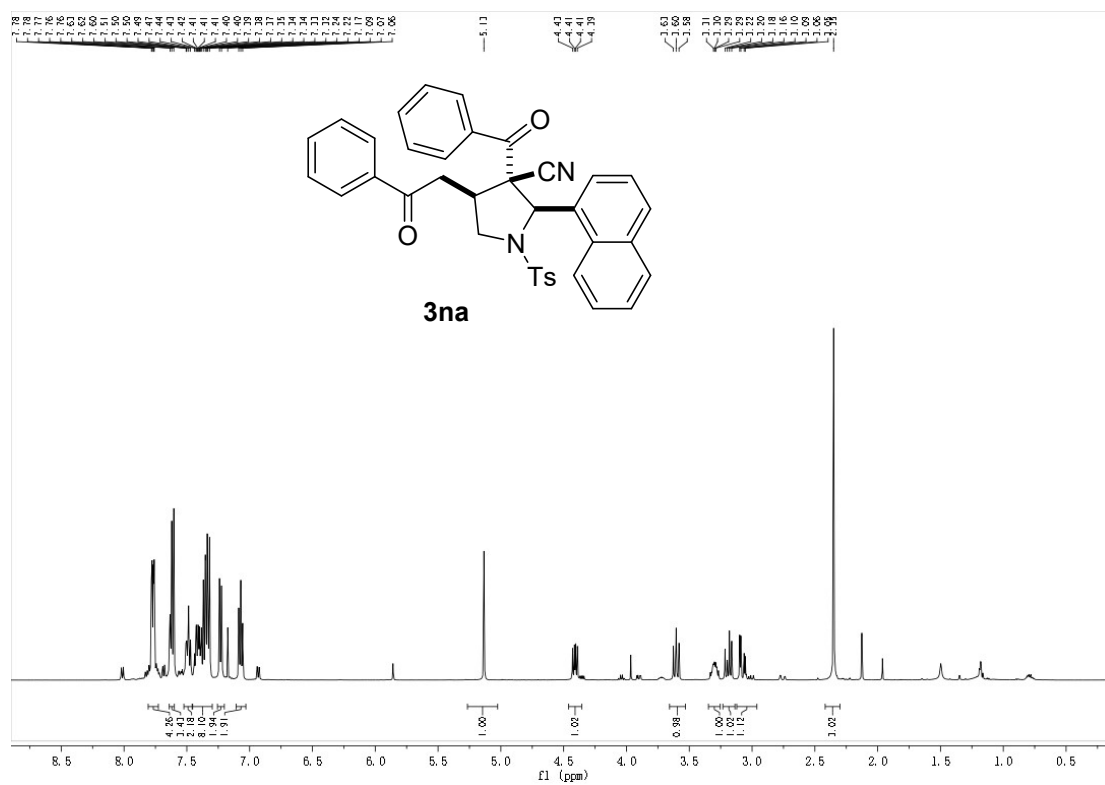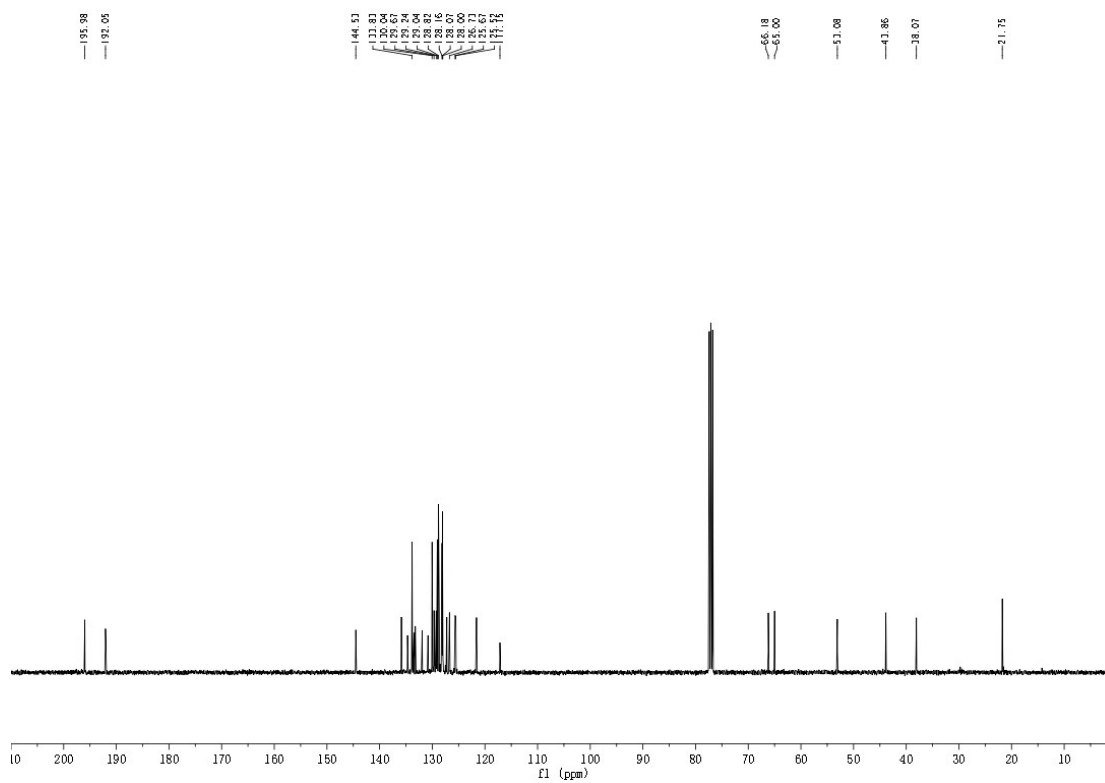

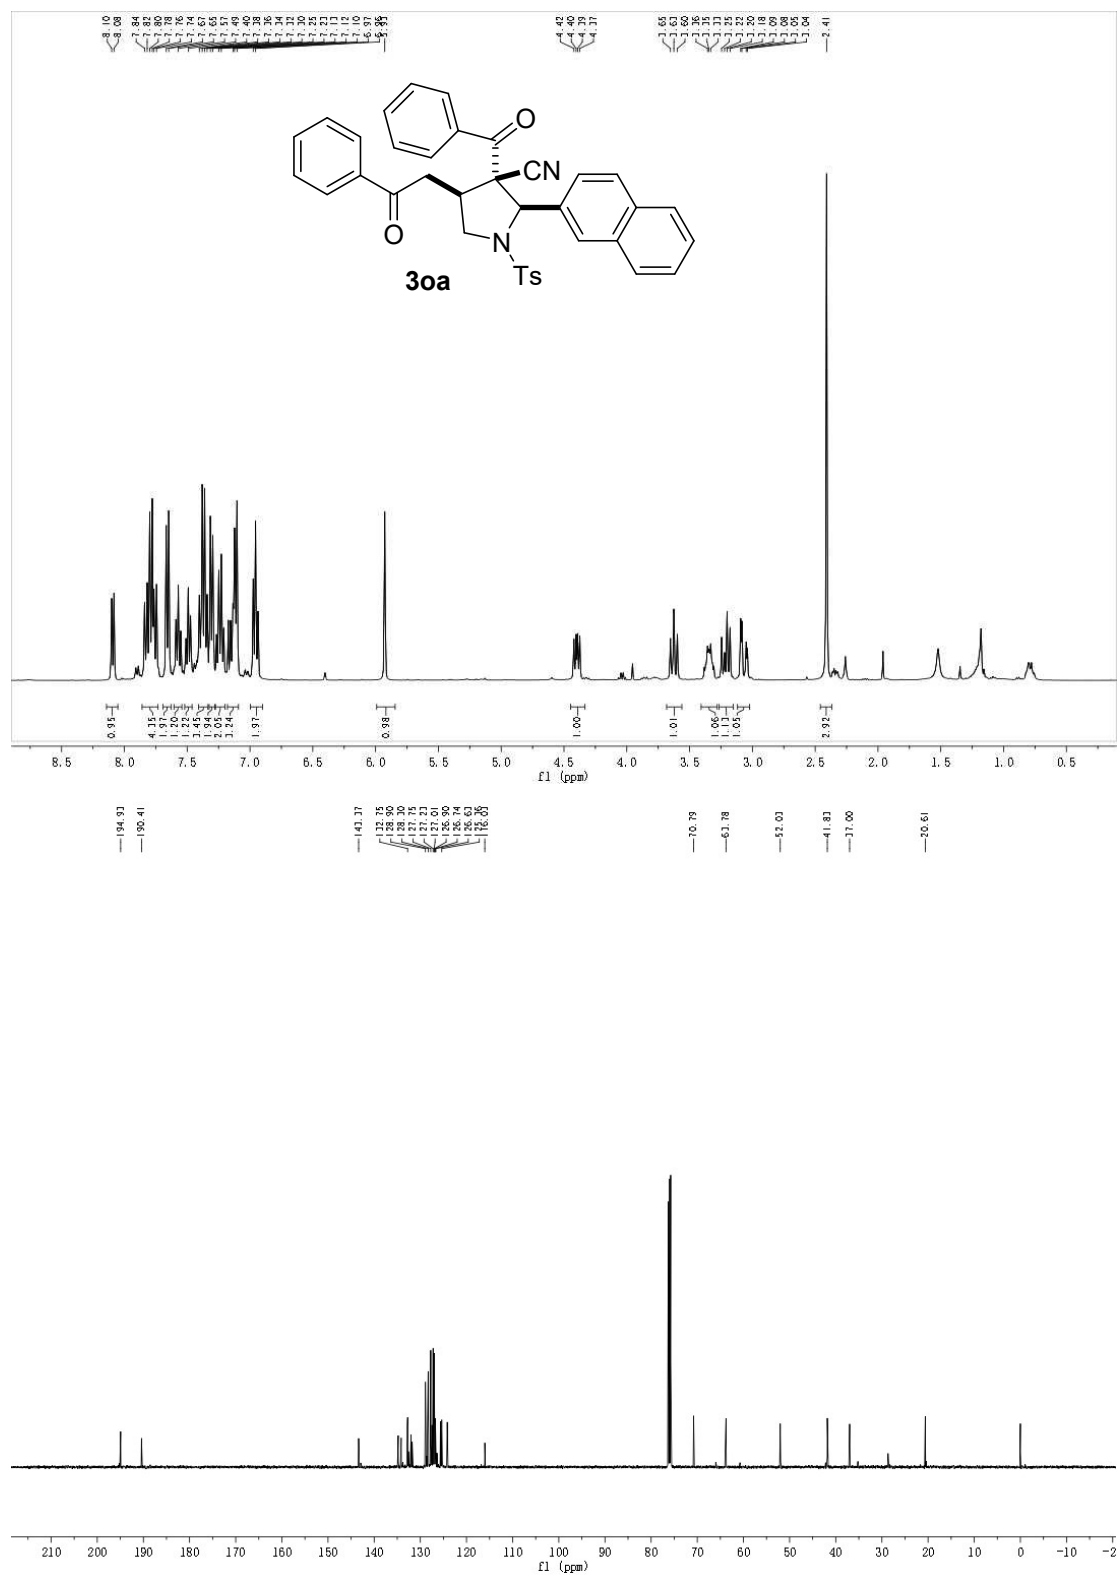

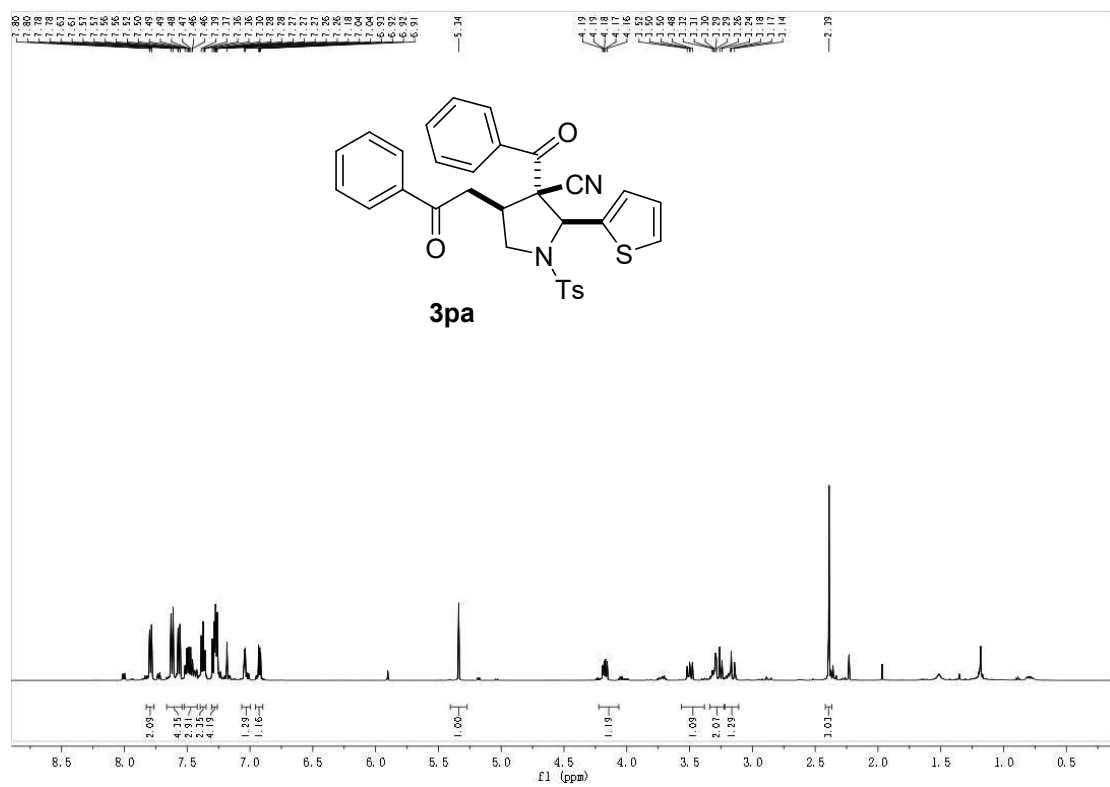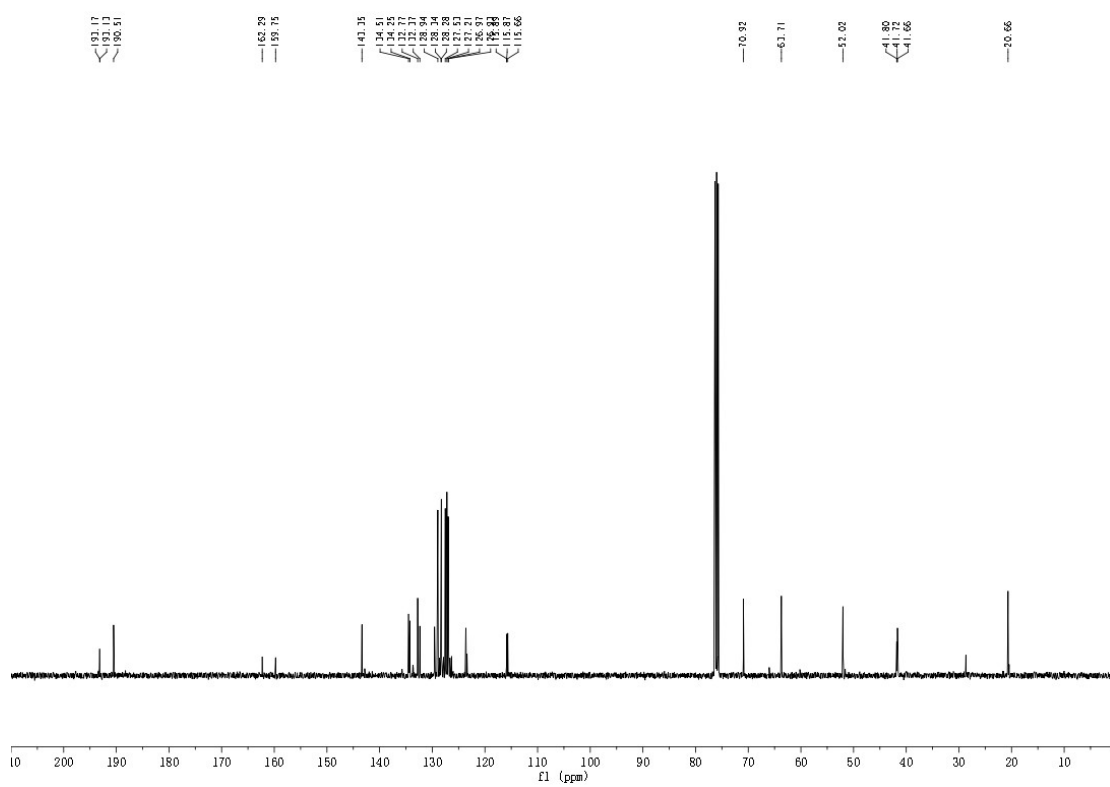

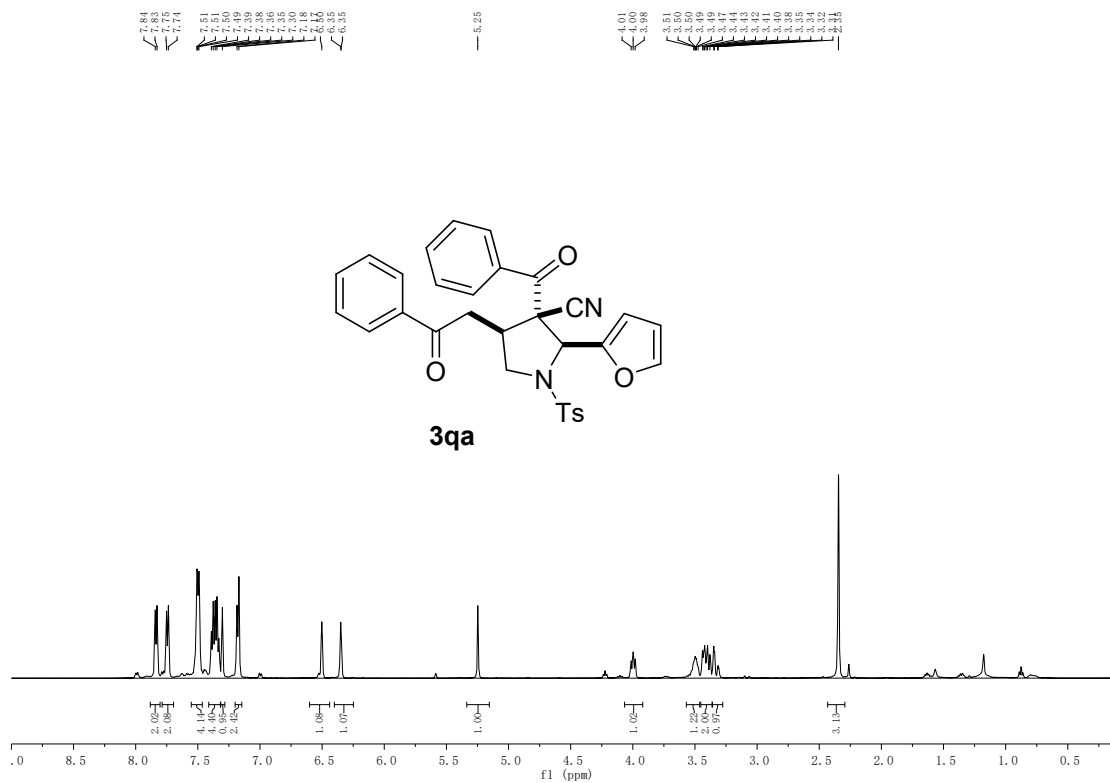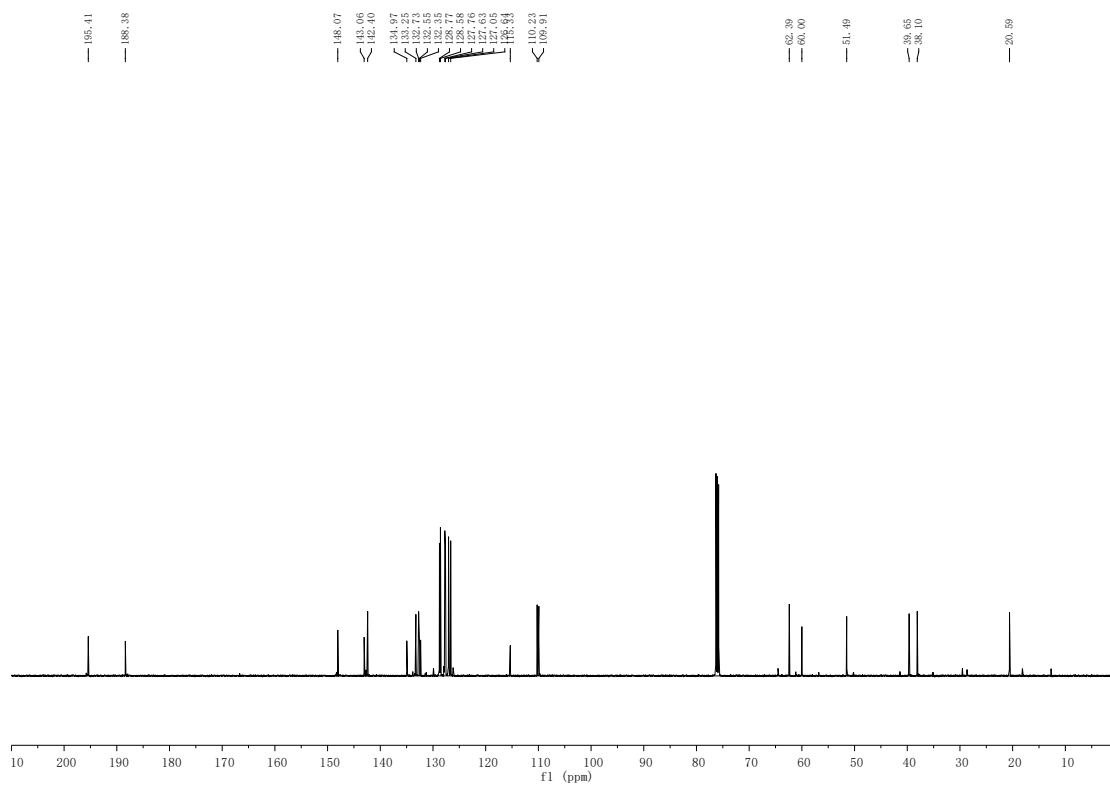

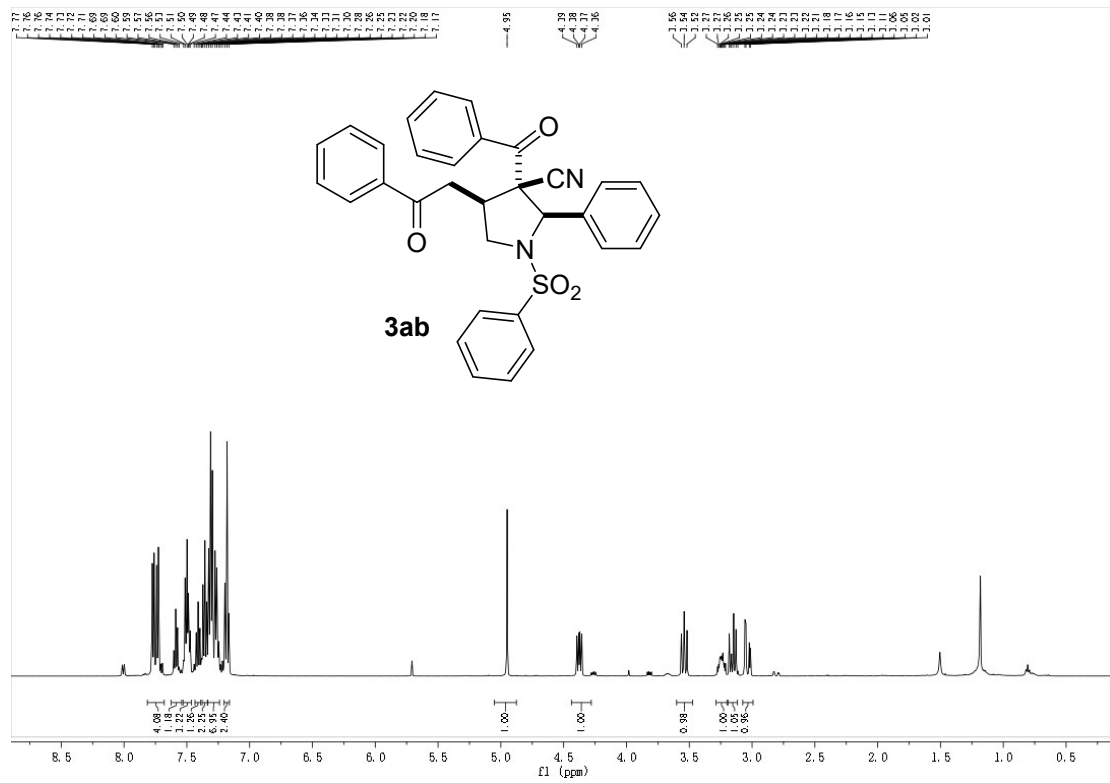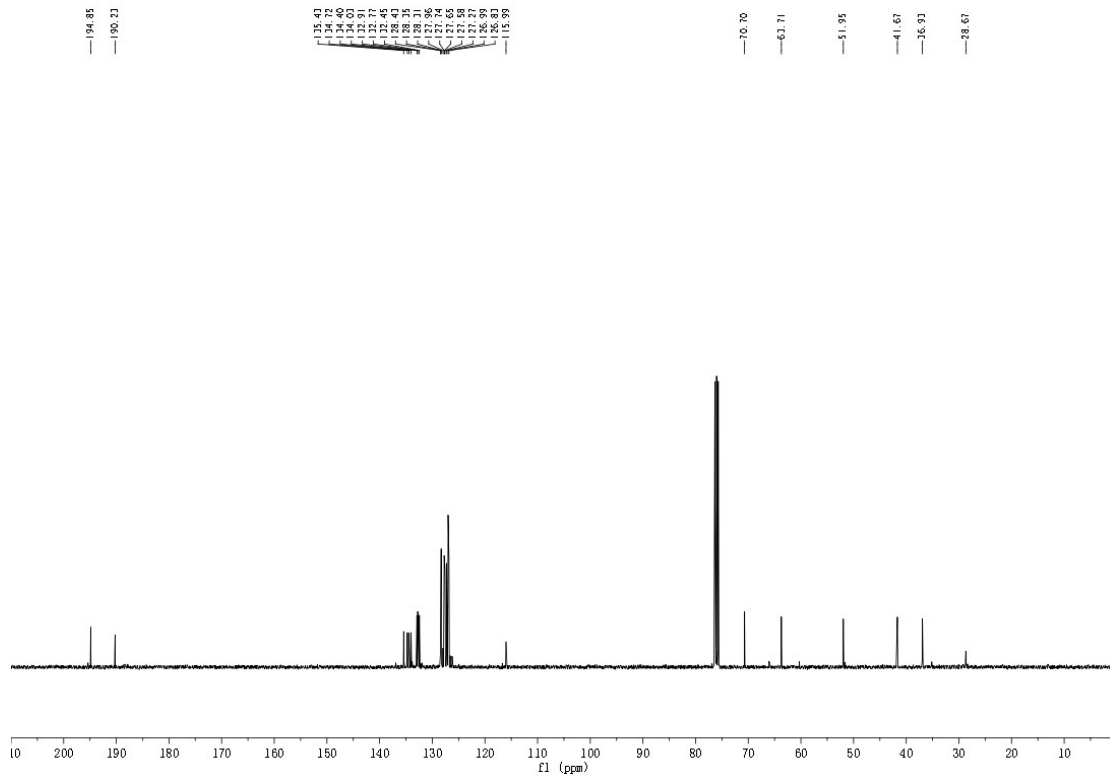

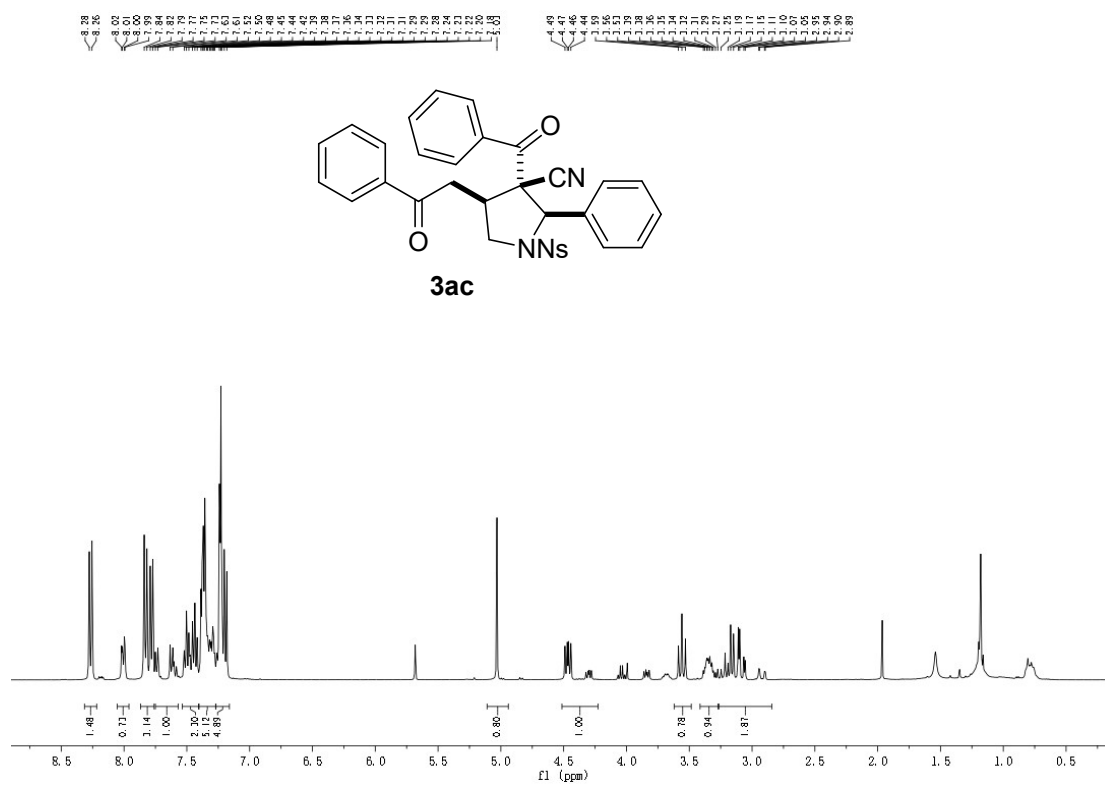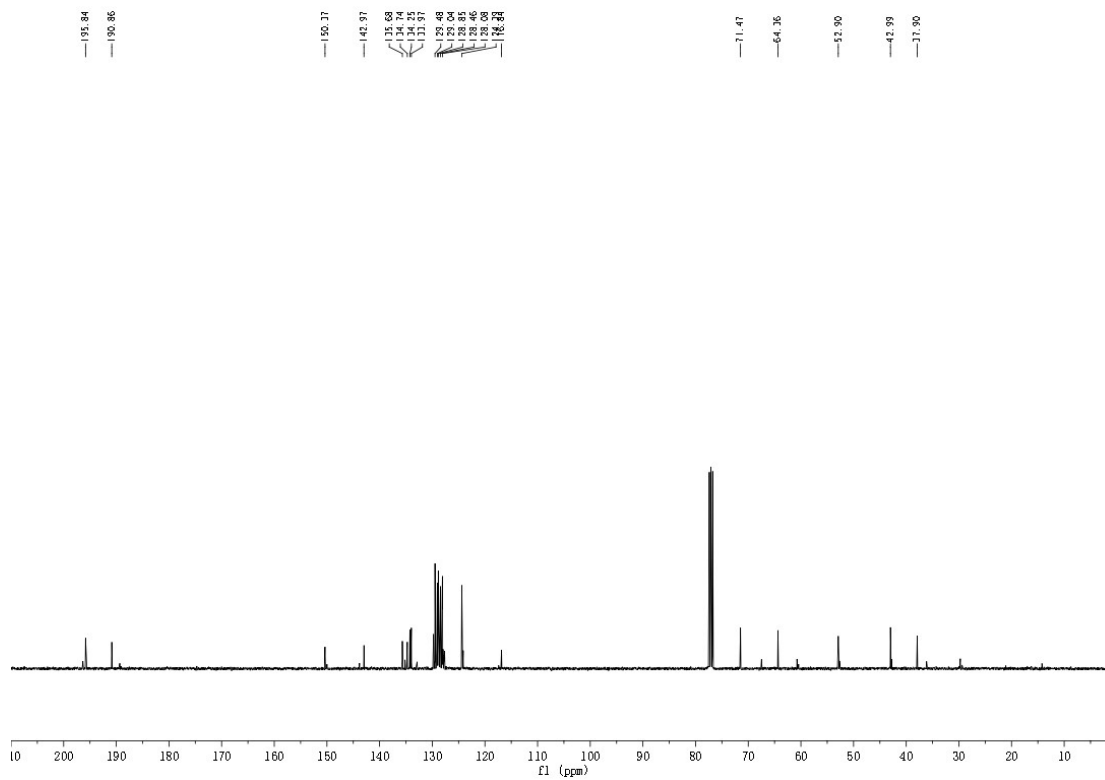

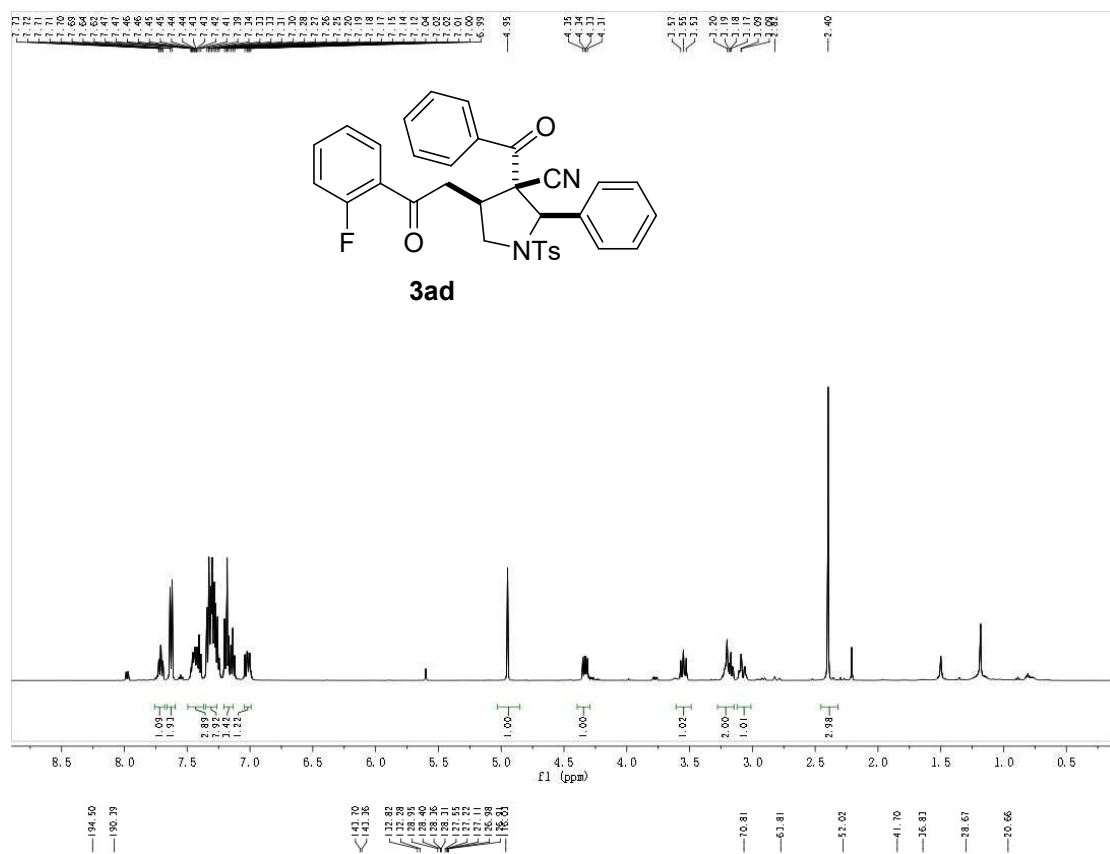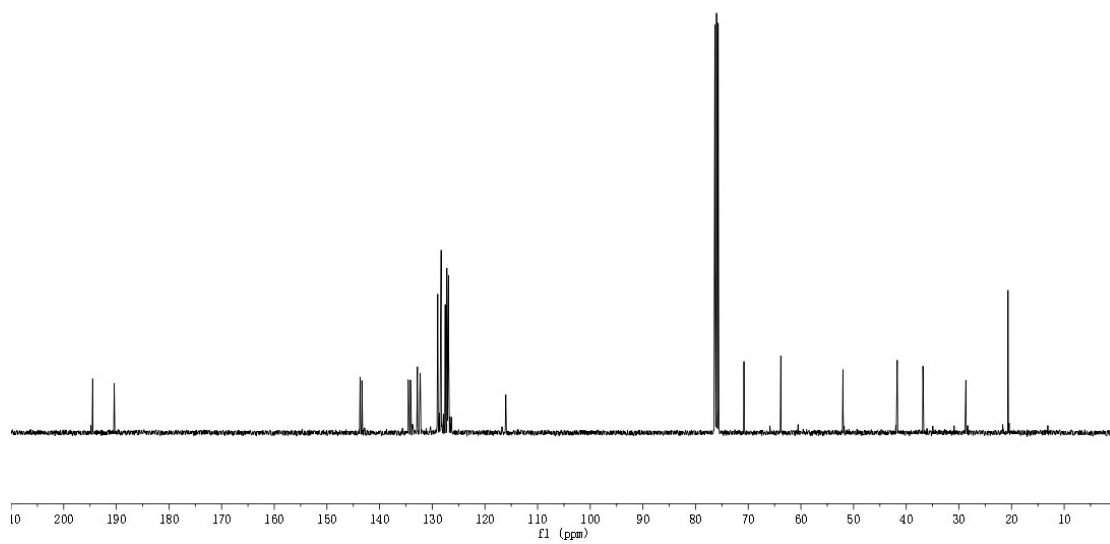



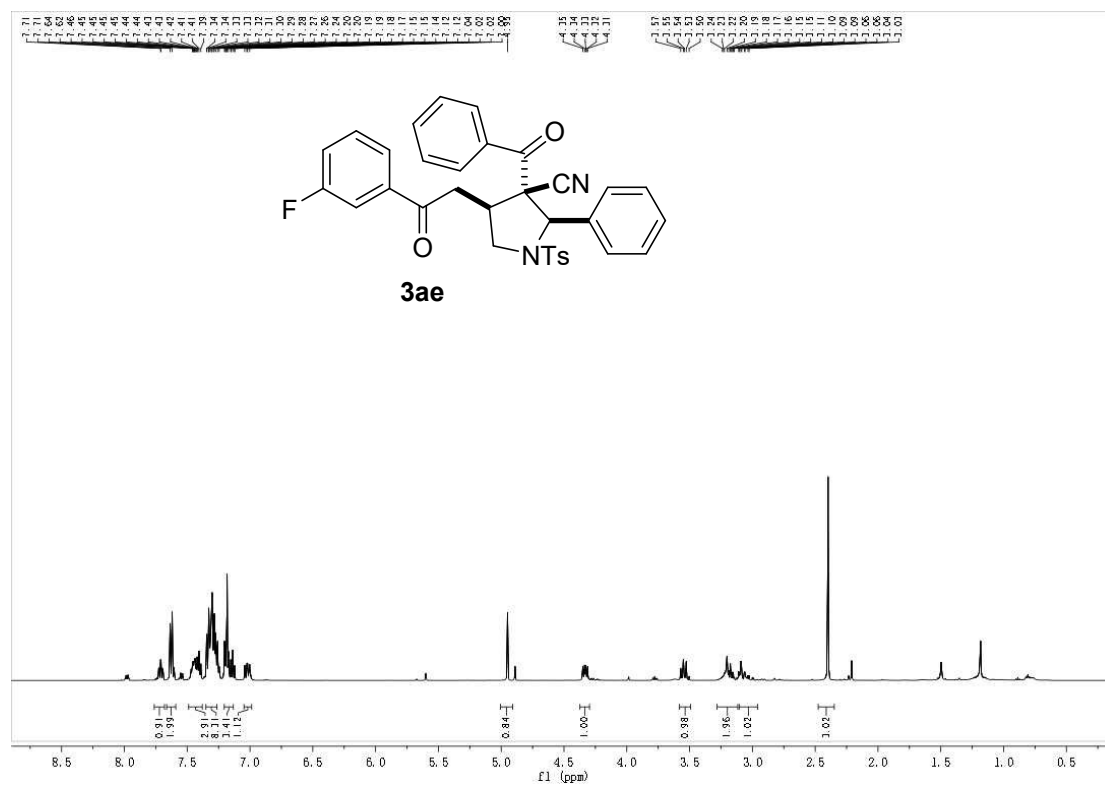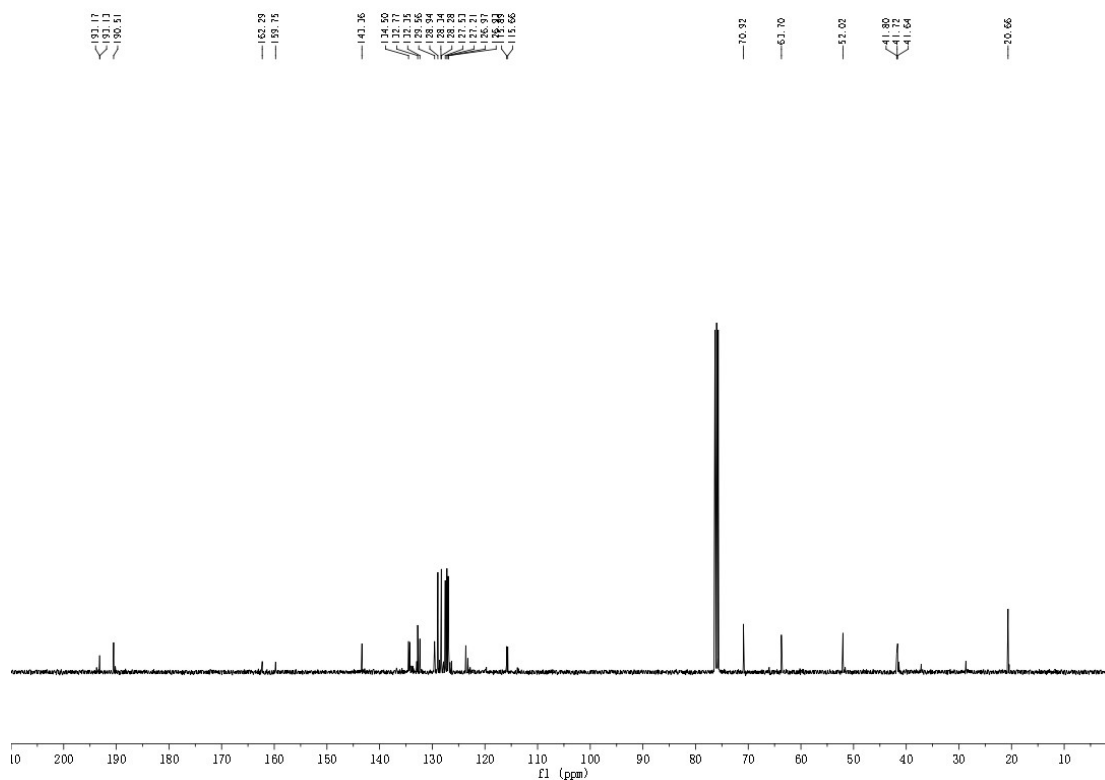

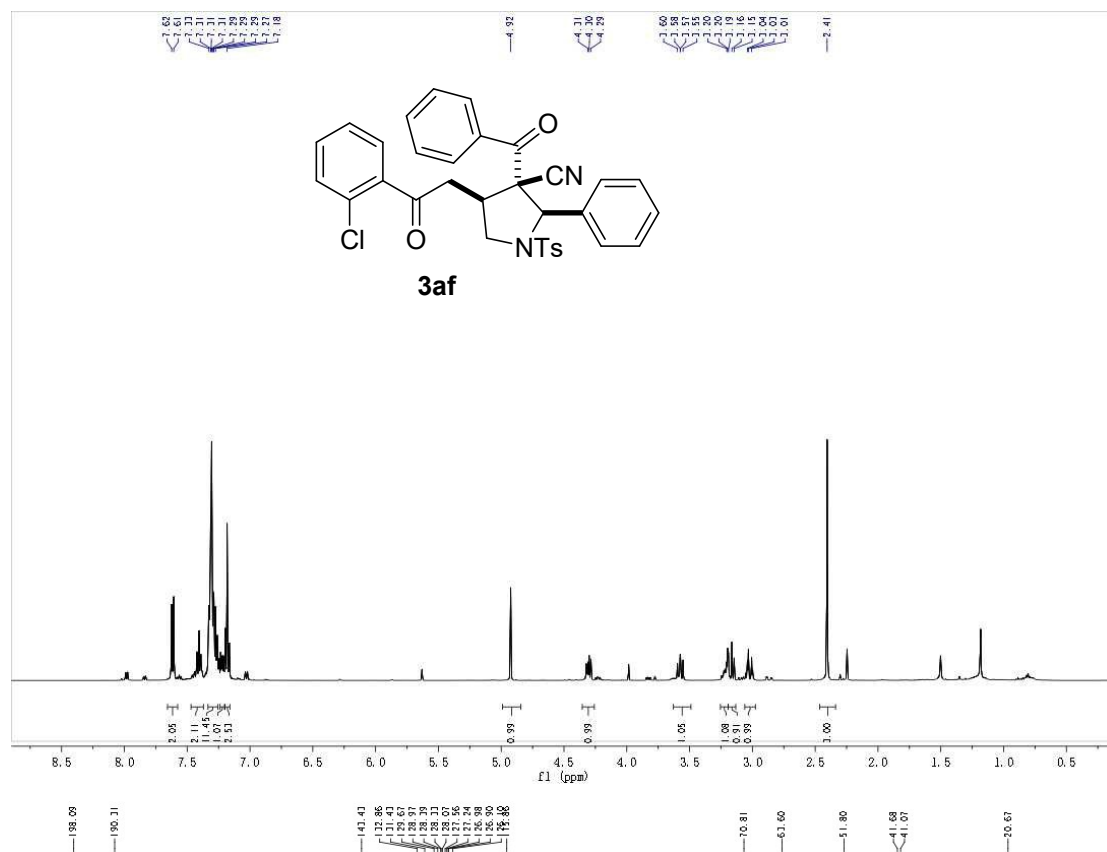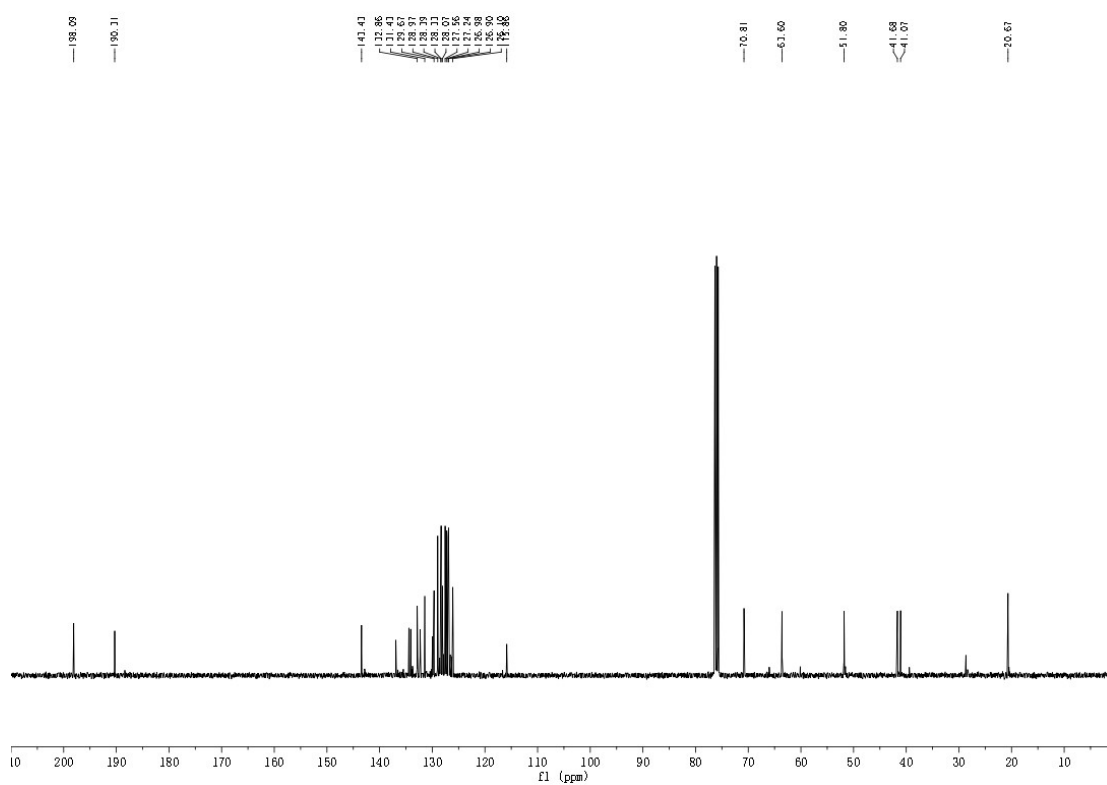

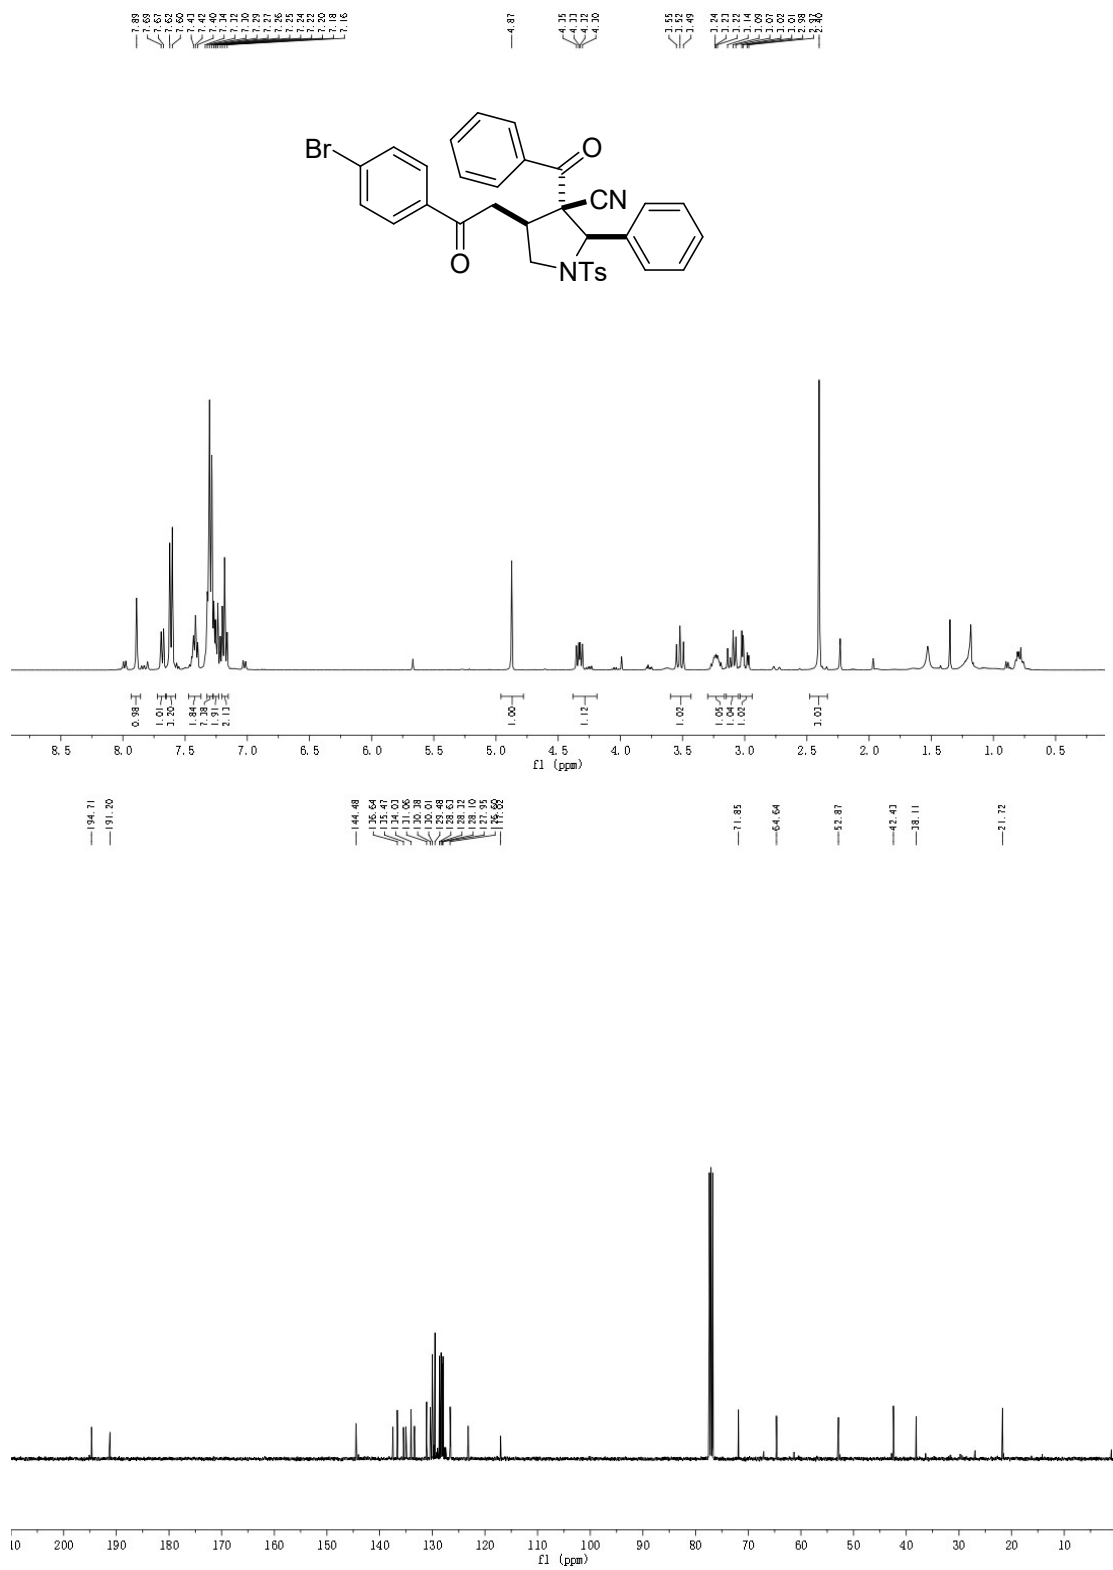

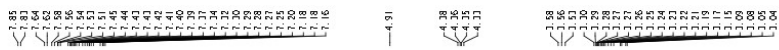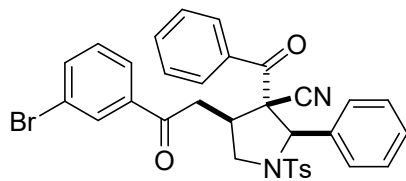

**3ag**

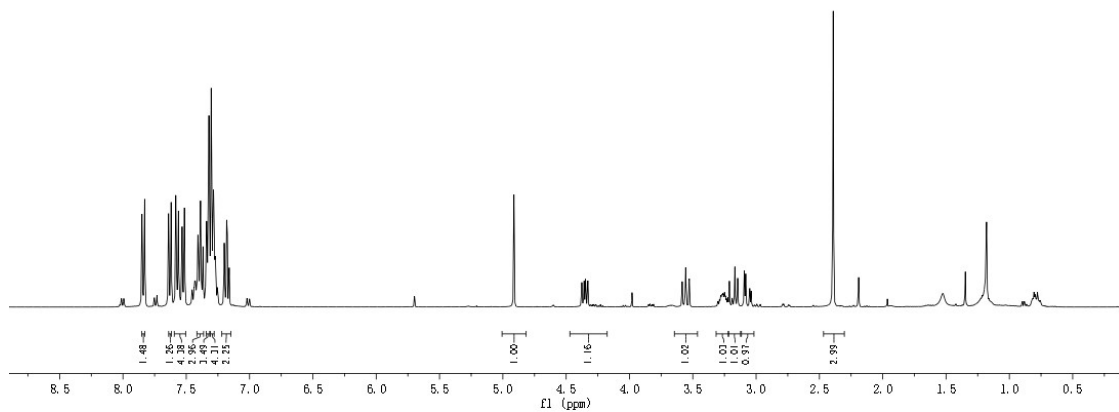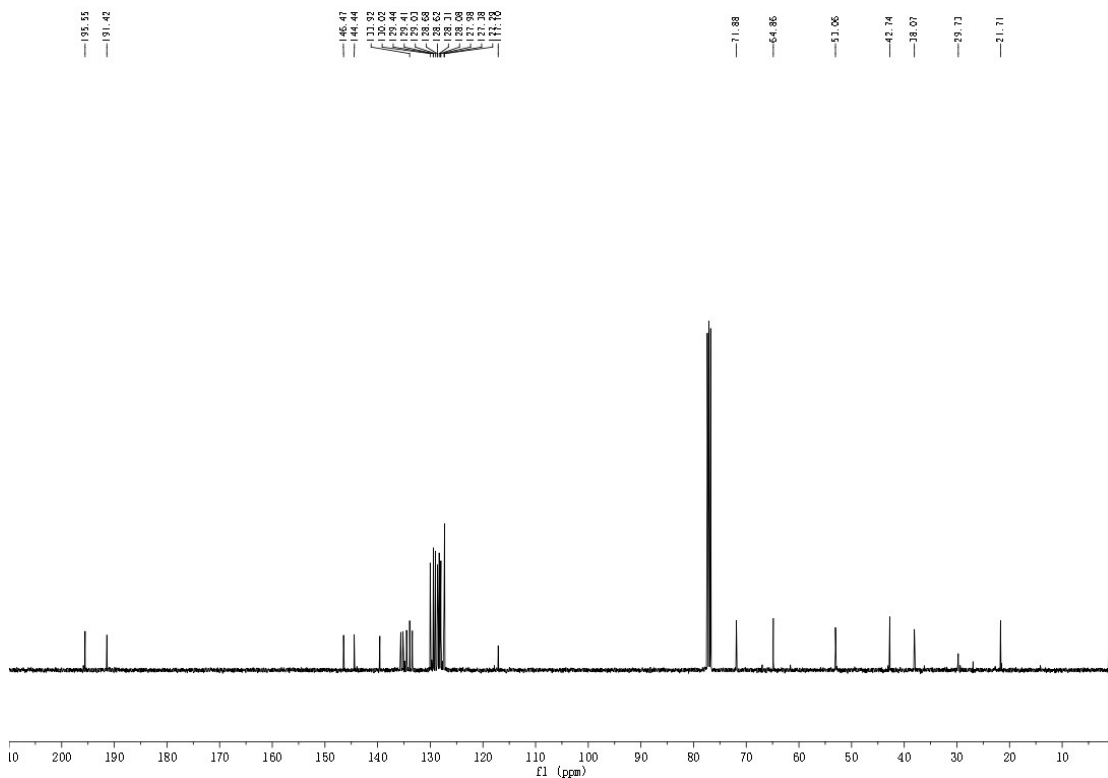

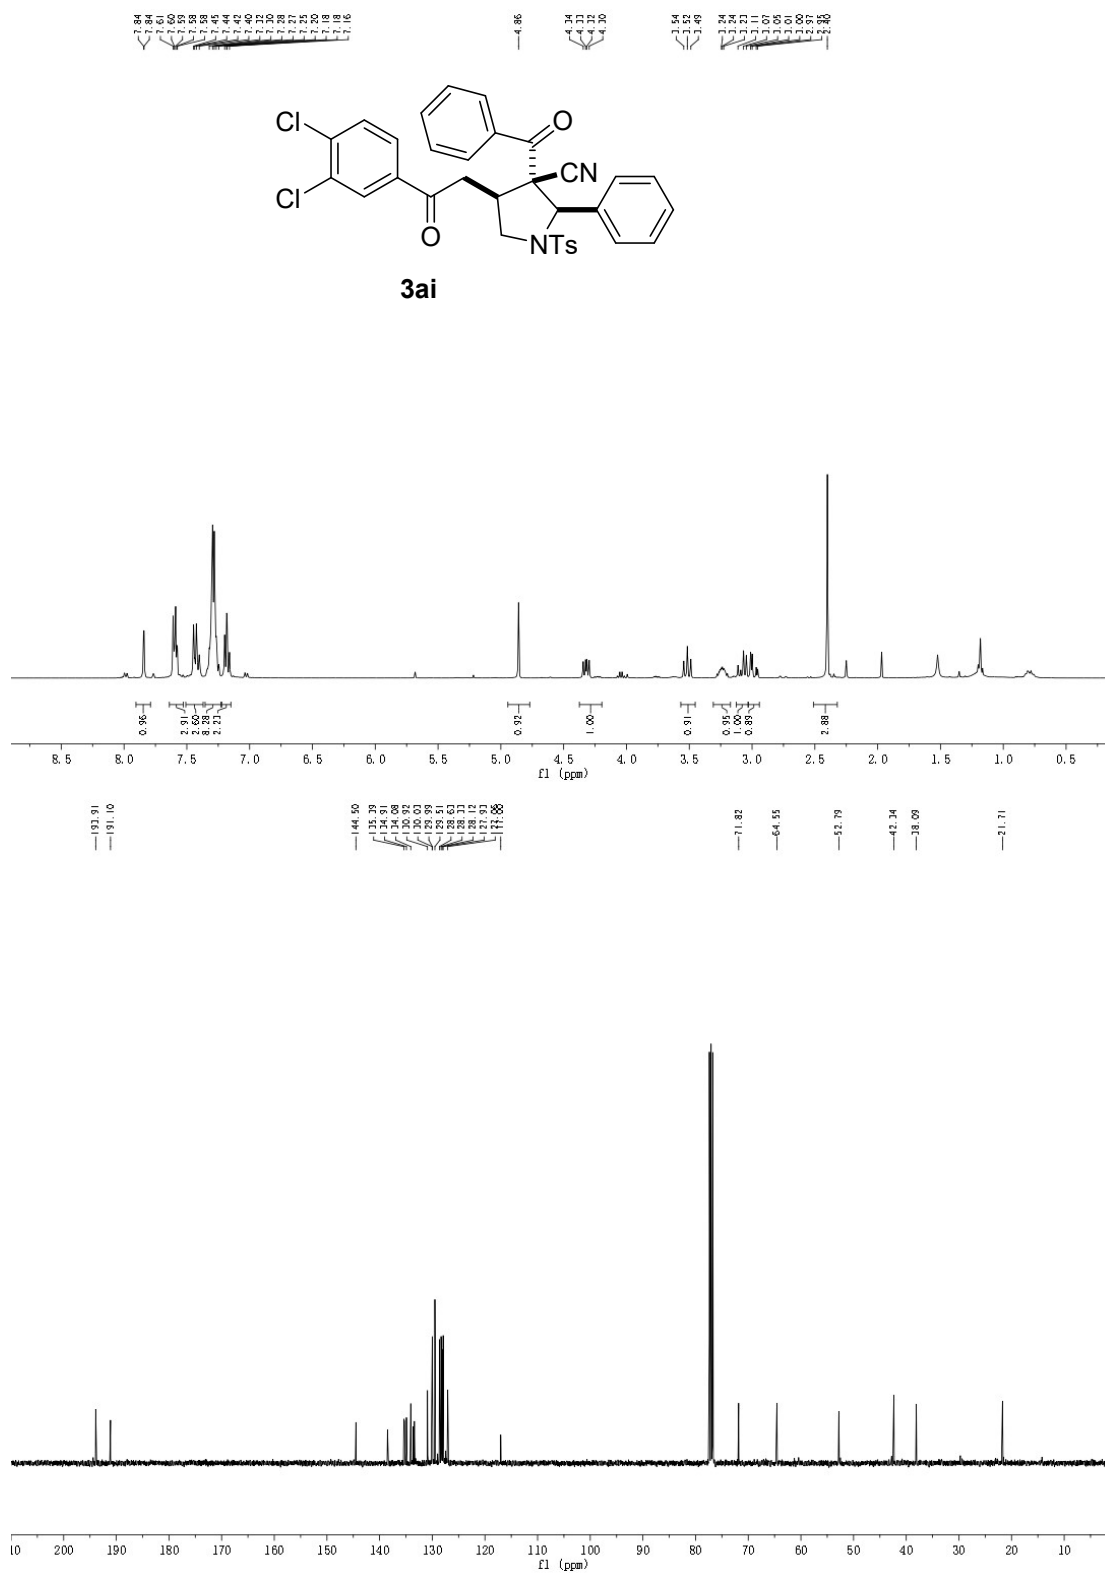

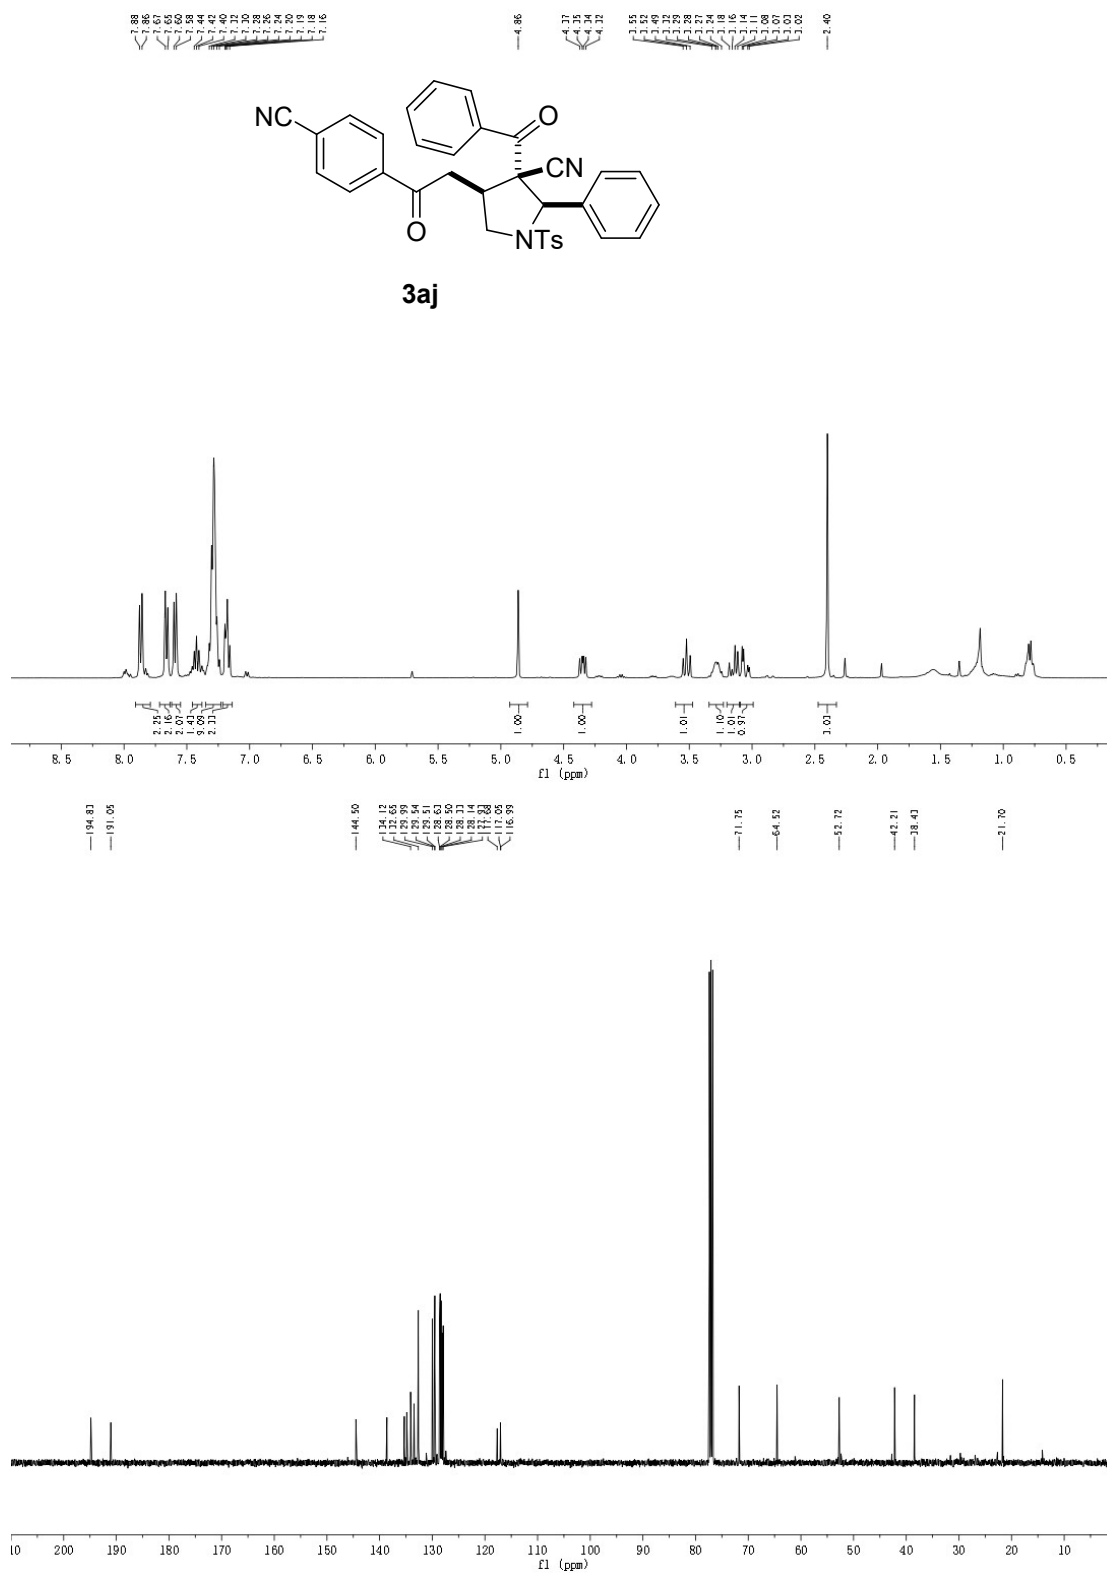

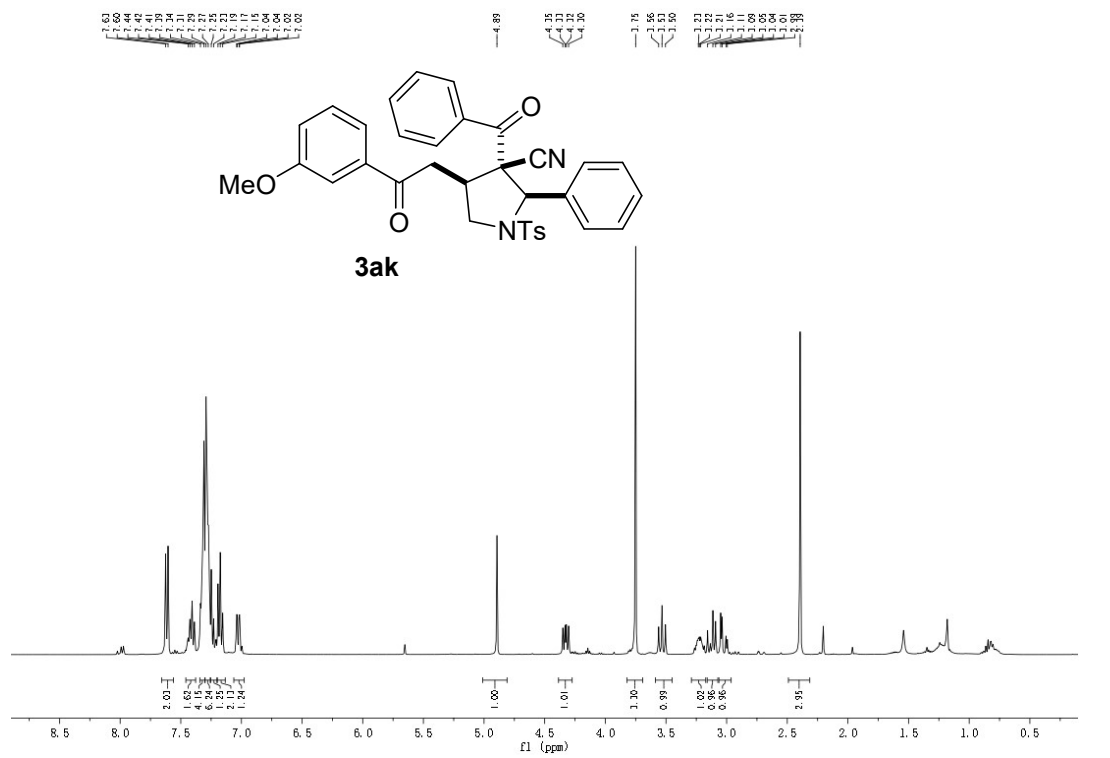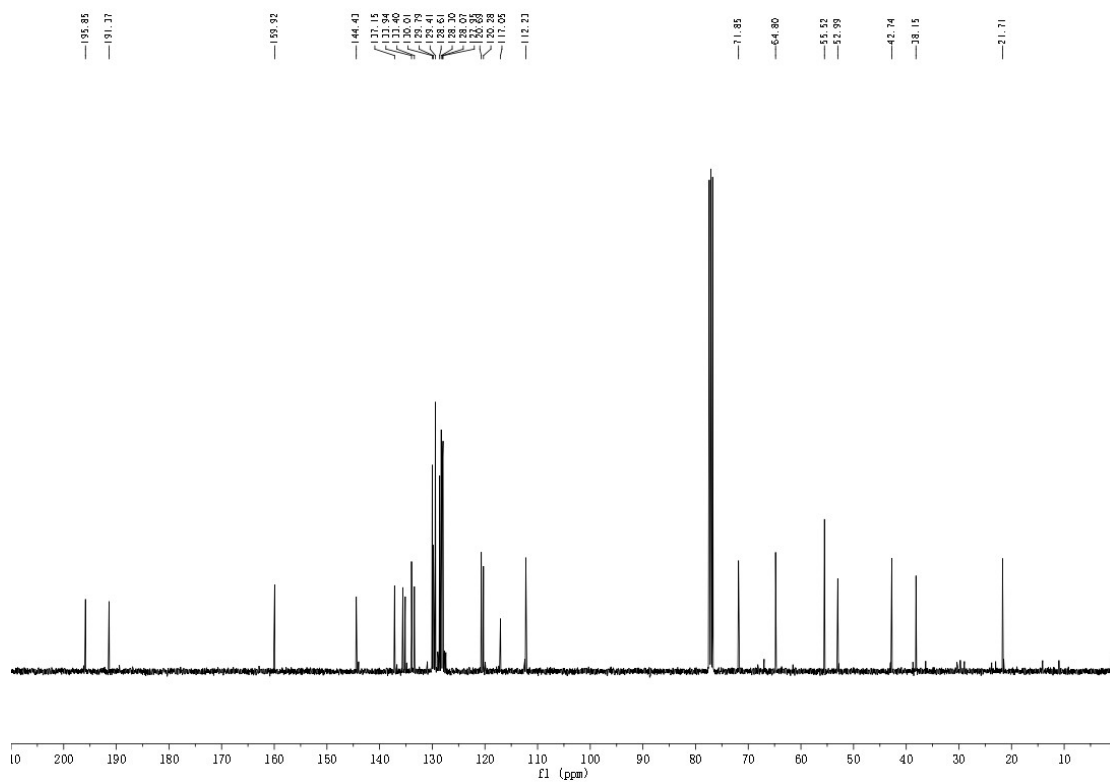

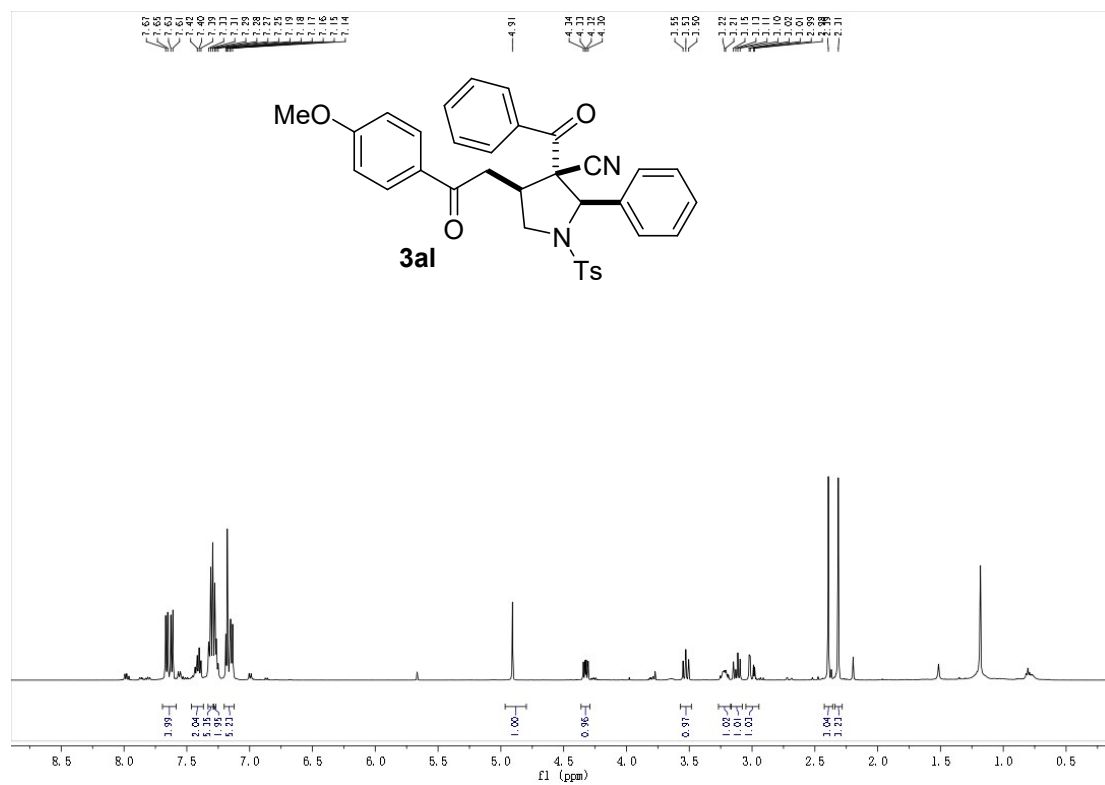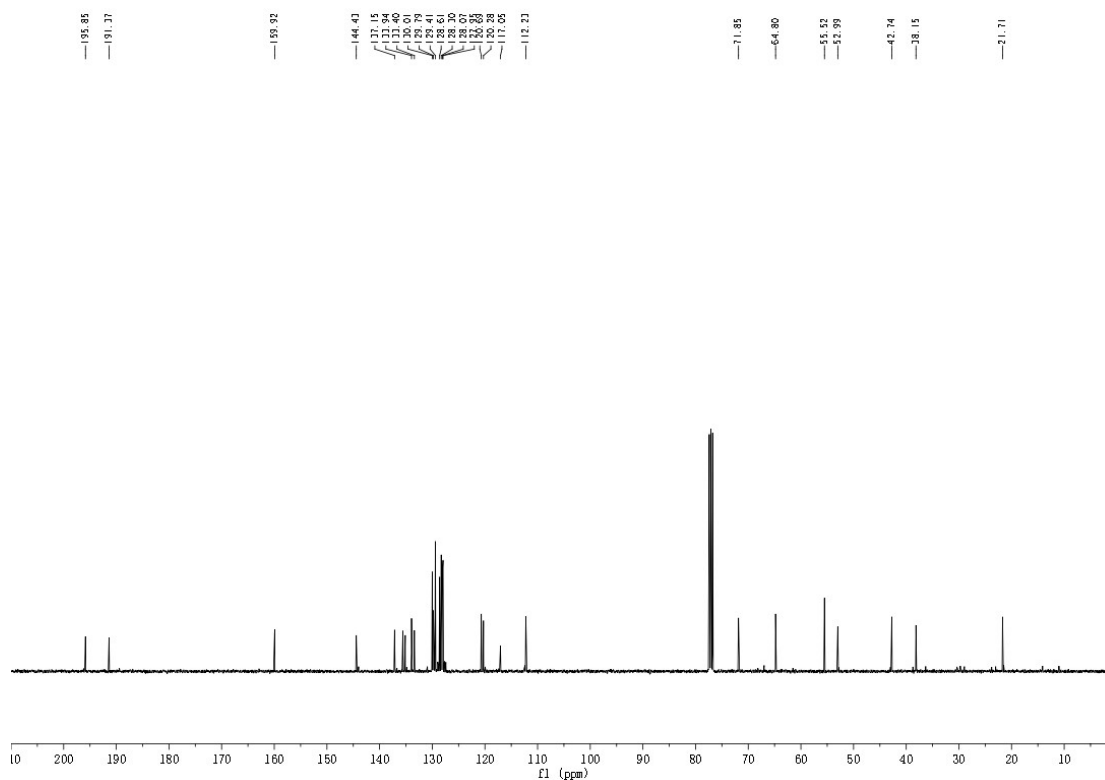



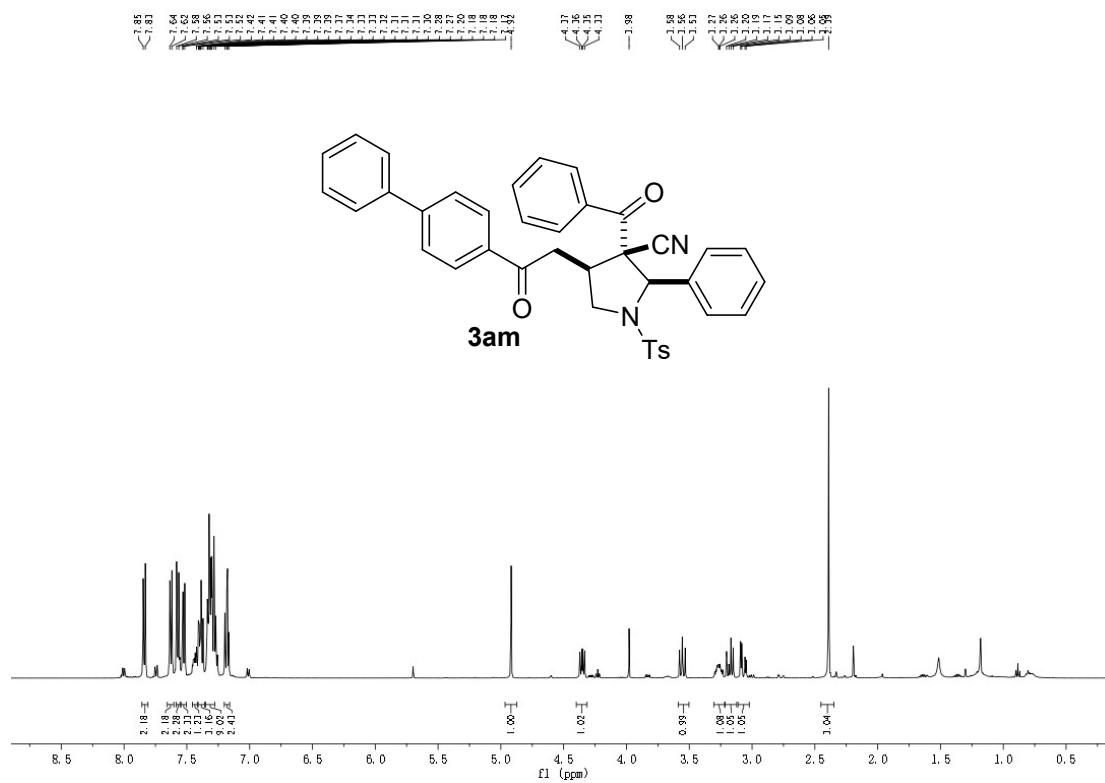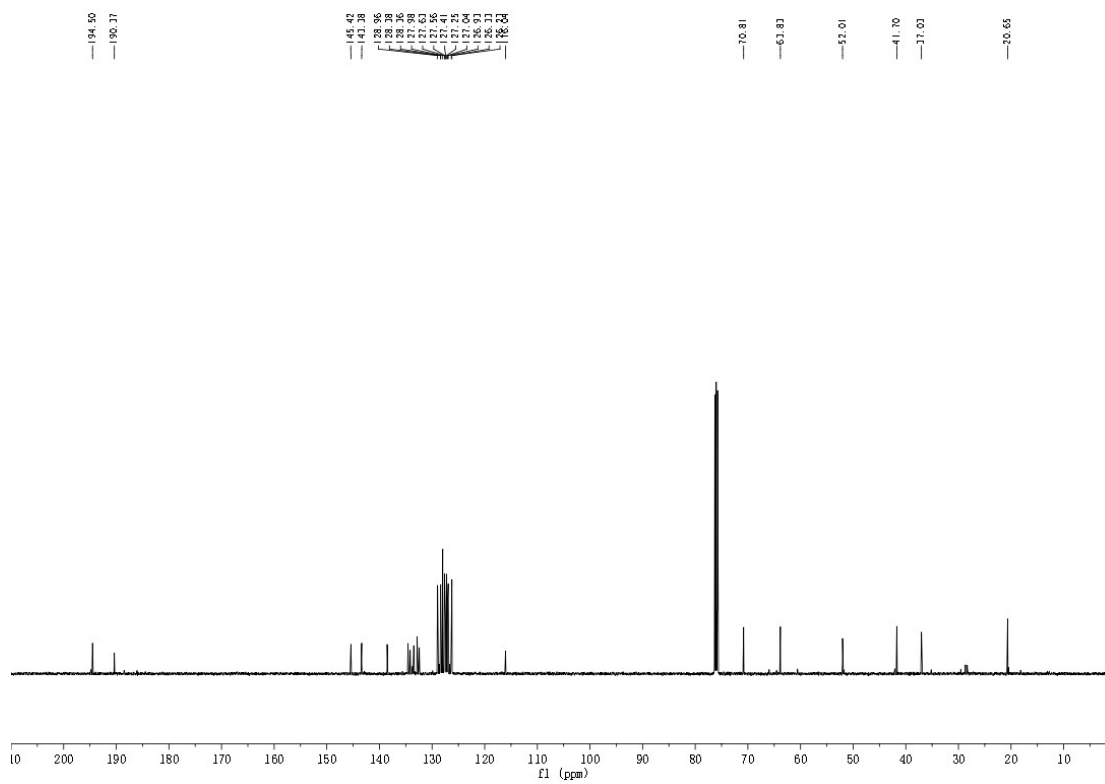

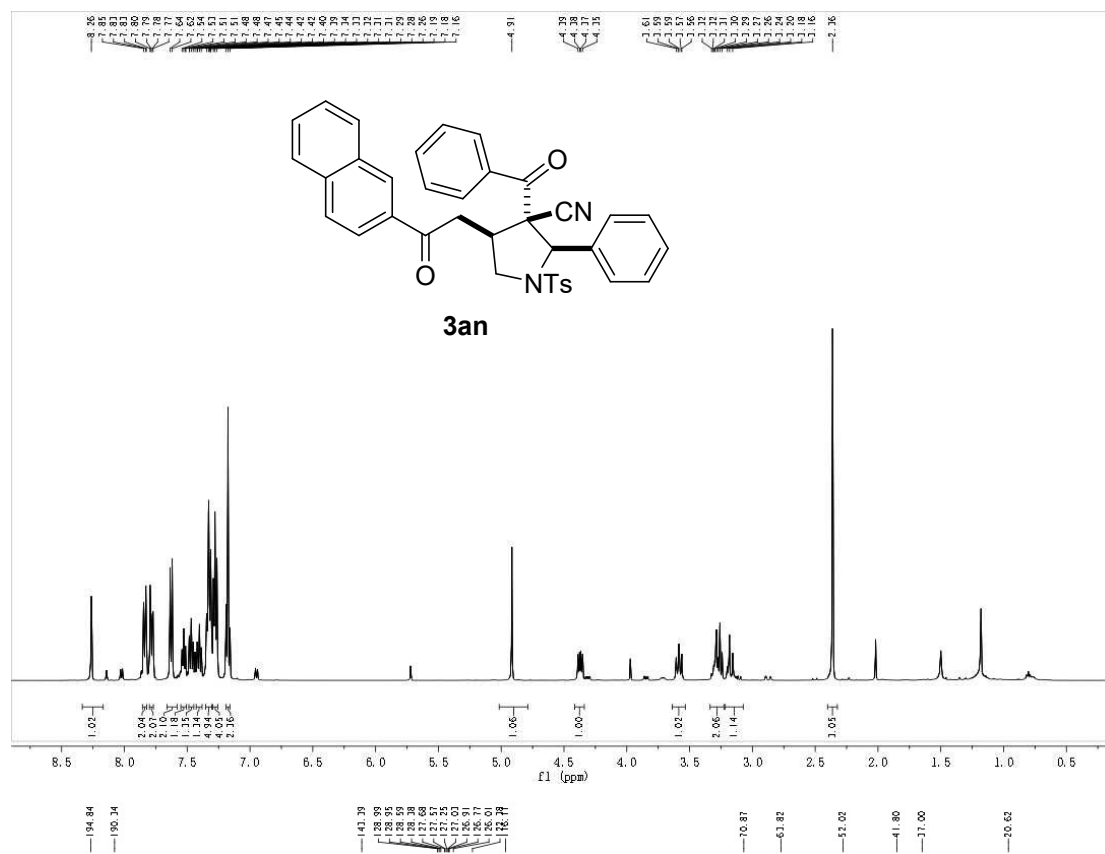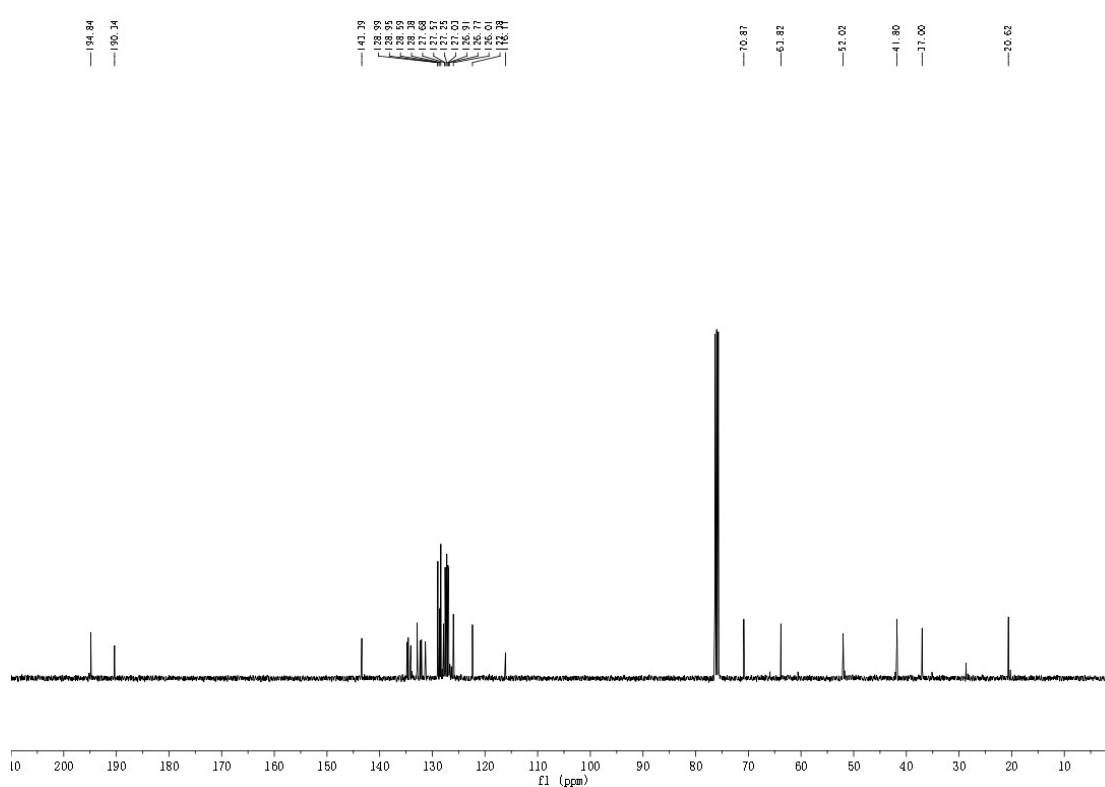

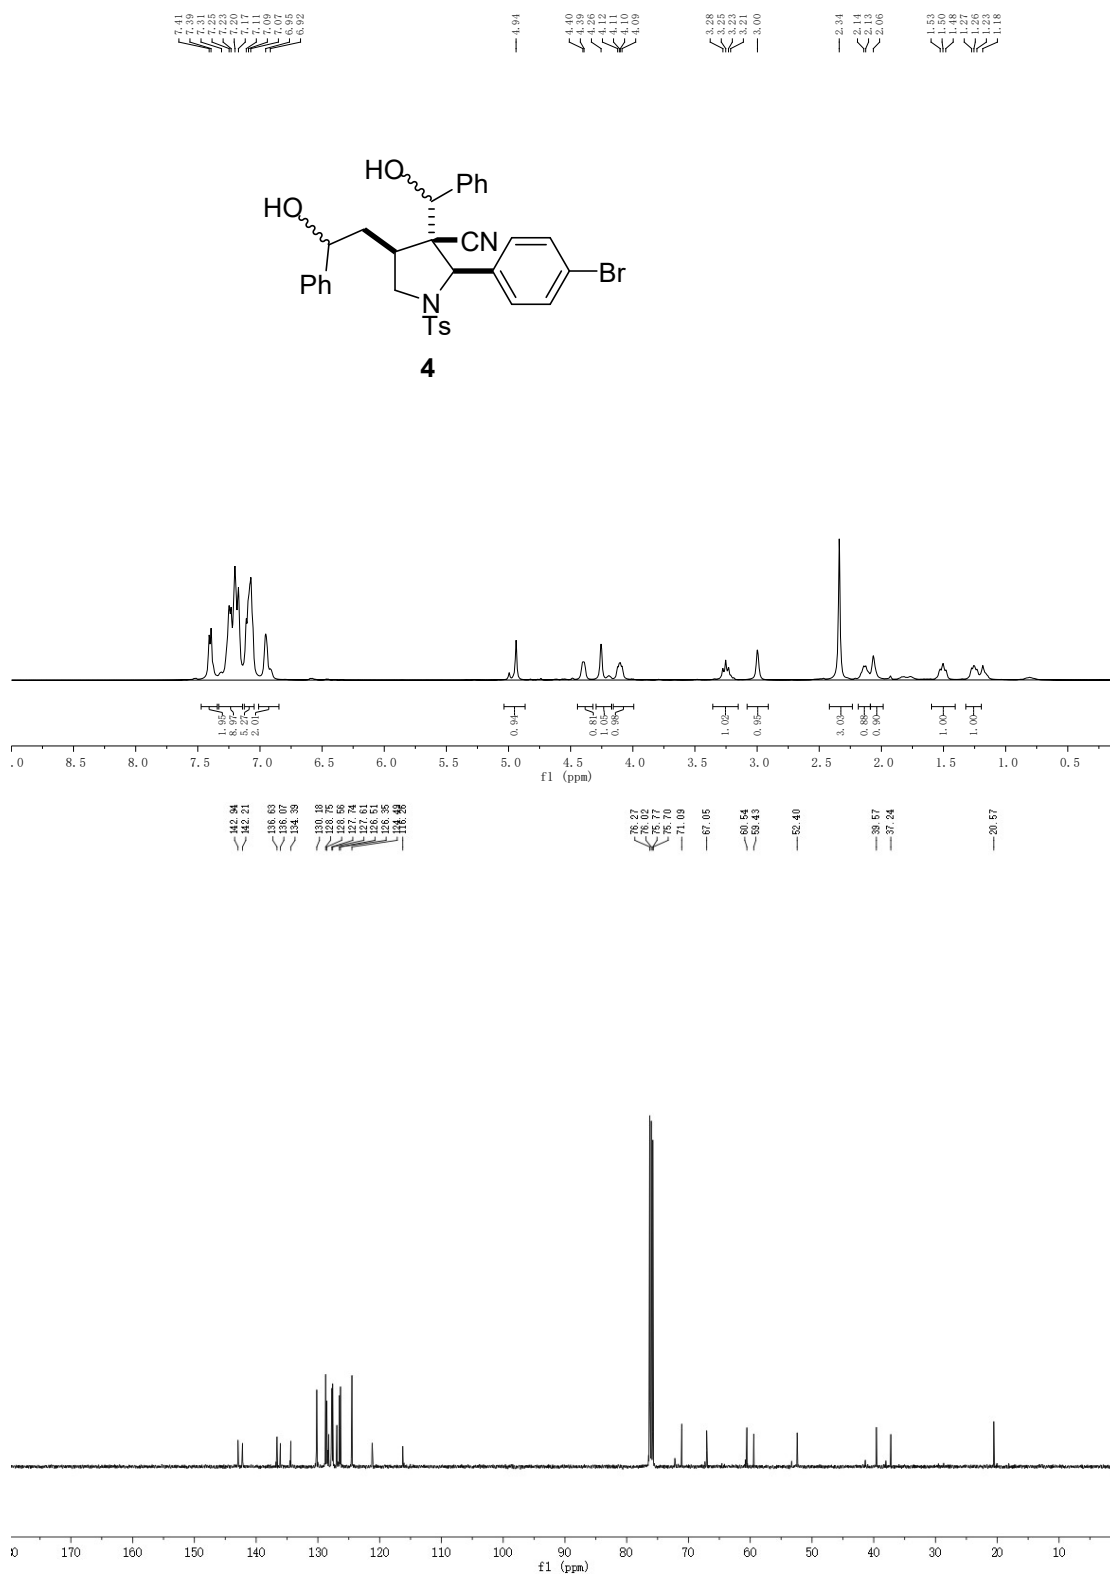

## X-Ray Crystallographic Data of 3aa

Crystallographic data for **3aa** have been deposited with the Cambridge Crystallographic Data Centre as deposition number CCDC 2081095. These data can be obtained free of charge via [www.ccdc.cam.ac.uk/data\\_request/cif](http://www.ccdc.cam.ac.uk/data_request/cif), or by emailing [data\\_request@ccdc.cam.ac.uk](mailto:data_request@ccdc.cam.ac.uk), or by contacting The Cambridge Crystallographic Data Centre, 12, Union Road, Cambridge CB2 1EZ, UK; fax: +44 1223 336033.

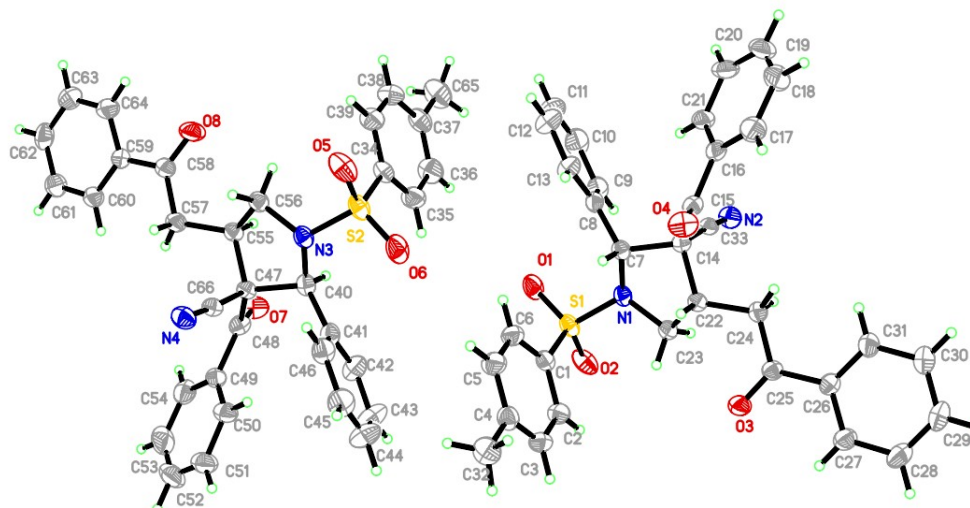

**Table 1.** Crystal data and structure refinement for **3aa**.

|                                         |                                                                              |                            |
|-----------------------------------------|------------------------------------------------------------------------------|----------------------------|
| Identification code                     | <b>3aa</b>                                                                   |                            |
| Empirical formula                       | C <sub>66</sub> H <sub>56</sub> N <sub>4</sub> O <sub>8</sub> S <sub>2</sub> |                            |
| Formula weight                          | 1097.26                                                                      |                            |
| Temperature                             | 293(2) K                                                                     |                            |
| Wavelength                              | 1.54184 Å                                                                    |                            |
| Crystal system, space group             | Monoclinic, P2(1)                                                            |                            |
| Unit cell dimensions                    | $a/\text{Å} = 9.7583(3)$                                                     | $\alpha/^\circ = 90$       |
|                                         | $b/\text{Å} = 21.2841(7)$                                                    | $\beta/^\circ = 92.287(2)$ |
|                                         | $c/\text{Å} = 13.5807(4)$                                                    | $\gamma/^\circ = 90$       |
| Volume/Å <sup>3</sup>                   | 2818.42(15)                                                                  |                            |
| Z, Calculated density g/cm <sup>3</sup> | 2, 1.293                                                                     |                            |
| Absorption coefficient/mm <sup>-1</sup> | 1.351                                                                        |                            |
| F(000)                                  | 1152                                                                         |                            |

|                                                |                                                   |
|------------------------------------------------|---------------------------------------------------|
| Crystal size/mm <sup>3</sup>                   | 0.120 × 0.120 × 0.110                             |
| Theta range for data collection/°              | 3.257 to 67.236 .                                 |
| Limiting indices                               | -11<=h<=8, -21<=k<=25, -16<=l<=16                 |
| Reflections collected / unique                 | 10591 / 7300 [R(int) = 0.0221]                    |
| Completeness to theta = 67.236                 | 99.8 %                                            |
| Max. and min. transmission                     | 1.00000 and 0.73560                               |
| Data / restraints / parameters                 | 7300 / 1 / 724                                    |
| Goodness-of-fit on F <sup>2</sup>              | 1.056                                             |
| Final R indices [I>2σ(I)]                      | R <sub>1</sub> = 0.0378, wR <sub>2</sub> = 0.0993 |
| R indices (all data)                           | R <sub>1</sub> = 0.0438, wR <sub>2</sub> = 0.1100 |
| Absolute structure parameter                   | 0.026(12)                                         |
| Extinction coefficient                         | 0.0040(2)                                         |
| Largest diff. peak and hole/ e.Å <sup>-3</sup> | 0.217 and -0.299                                  |

**Table 2. Atomic coordinates (×10<sup>4</sup>) and equivalent isotropic displacement parameters (Å<sup>2</sup>×10<sup>3</sup>) for 3aa. U<sub>(eq)</sub> is defined as one third of the trace of the orthogonalized U<sub>ij</sub> tensor.**

| Atom | x        | y       | z       | U(eq) |
|------|----------|---------|---------|-------|
| S(1) | 8373(1)  | 1936(1) | 2858(1) | 49(1) |
| S(2) | 4619(1)  | -130(1) | 5343(1) | 53(1) |
| N(1) | 8871(3)  | 1586(2) | 1853(2) | 42(1) |
| N(2) | 11598(3) | 979(2)  | 443(3)  | 53(1) |
| N(3) | 4030(3)  | 176(2)  | 6349(2) | 44(1) |
| N(4) | 1078(3)  | 714(2)  | 7647(3) | 57(1) |
| O(1) | 8625(3)  | 1510(2) | 3650(2) | 66(1) |
| O(2) | 9006(3)  | 2541(2) | 2867(2) | 65(1) |
| O(3) | 7593(4)  | 2611(2) | -774(2) | 64(1) |
| O(4) | 7097(3)  | 298(2)  | -162(2) | 62(1) |
| O(5) | 3950(3)  | -722(2) | 5226(2) | 71(1) |
| O(6) | 4490(3)  | 337(2)  | 4591(2) | 74(1) |
| O(7) | 5441(3)  | 1436(2) | 8543(2) | 67(1) |
| O(8) | 4953(4)  | -924(2) | 9000(2) | 77(1) |
| C(1) | 6589(4)  | 2044(2) | 2714(3) | 44(1) |
| C(2) | 6067(4)  | 2605(2) | 2344(3) | 51(1) |
| C(3) | 4673(4)  | 2672(2) | 2204(3) | 56(1) |
| C(4) | 3782(4)  | 2193(2) | 2423(3) | 55(1) |
| C(5) | 4332(5)  | 1645(2) | 2817(4) | 65(1) |
| C(6) | 5709(4)  | 1566(2) | 2962(3) | 58(1) |
| C(7) | 8510(3)  | 925(2)  | 1651(3) | 40(1) |

|       |          |          |          |        |
|-------|----------|----------|----------|--------|
| C(8)  | 9133(4)  | 438(2)   | 2338(3)  | 47(1)  |
| C(9)  | 10456(4) | 489(3)   | 2753(3)  | 58(1)  |
| C(10) | 10982(5) | -16(3)   | 3305(4)  | 83(2)  |
| C(11) | 10212(8) | -548(3)  | 3440(4)  | 96(2)  |
| C(12) | 8943(8)  | -588(3)  | 3042(4)  | 90(2)  |
| C(13) | 8384(5)  | -102(2)  | 2499(3)  | 66(1)  |
| C(14) | 8941(3)  | 866(2)   | 564(3)   | 37(1)  |
| C(15) | 8311(4)  | 278(2)   | 47(3)    | 43(1)  |
| C(16) | 9169(4)  | -266(2)  | -209(3)  | 49(1)  |
| C(17) | 8805(7)  | -595(2)  | -1074(4) | 77(2)  |
| C(18) | 9603(9)  | -1095(3) | -1345(5) | 97(2)  |
| C(19) | 10703(7) | -1285(3) | -766(5)  | 91(2)  |
| C(20) | 11044(5) | -984(2)  | 99(5)    | 71(1)  |
| C(21) | 10287(4) | -467(2)  | 371(3)   | 55(1)  |
| C(22) | 8316(3)  | 1484(2)  | 132(2)   | 38(1)  |
| C(23) | 8739(4)  | 1961(2)  | 932(2)   | 43(1)  |
| C(24) | 8727(4)  | 1634(2)  | -907(3)  | 44(1)  |
| C(25) | 8058(4)  | 2221(2)  | -1319(3) | 43(1)  |
| C(26) | 8026(4)  | 2323(2)  | -2407(3) | 44(1)  |
| C(27) | 7559(5)  | 2897(2)  | -2763(3) | 57(1)  |
| C(28) | 7506(5)  | 3017(3)  | -3768(3) | 67(1)  |
| C(29) | 7919(5)  | 2569(3)  | -4416(3) | 72(2)  |
| C(30) | 8391(5)  | 1997(3)  | -4075(3) | 70(1)  |
| C(31) | 8435(4)  | 1876(3)  | -3067(3) | 57(1)  |
| C(32) | 2262(4)  | 2269(3)  | 2255(4)  | 73(1)  |
| C(33) | 10446(4) | 905(2)   | 501(3)   | 39(1)  |
| C(34) | 6376(4)  | -284(2)  | 5567(3)  | 48(1)  |
| C(35) | 7319(4)  | 190(2)   | 5445(4)  | 66(1)  |
| C(36) | 8688(5)  | 65(3)    | 5626(4)  | 75(2)  |
| C(37) | 9148(4)  | -516(3)  | 5925(4)  | 62(1)  |
| C(38) | 8188(5)  | -980(2)  | 6046(4)  | 63(1)  |
| C(39) | 6808(4)  | -871(2)  | 5872(3)  | 58(1)  |
| C(40) | 4302(3)  | 841(2)   | 6613(3)  | 43(1)  |
| C(41) | 3703(4)  | 1333(2)  | 5930(3)  | 50(1)  |
| C(42) | 4396(5)  | 1894(3)  | 5861(4)  | 70(1)  |
| C(43) | 3819(8)  | 2391(3)  | 5353(5)  | 100(2) |
| C(44) | 2562(8)  | 2328(4)  | 4908(5)  | 99(2)  |
| C(45) | 1867(6)  | 1771(3)  | 4946(4)  | 83(2)  |
| C(46) | 2431(4)  | 1269(3)  | 5457(3)  | 59(1)  |
| C(47) | 3742(3)  | 854(2)   | 7675(2)  | 37(1)  |
| C(48) | 4258(4)  | 1433(2)  | 8262(3)  | 46(1)  |
| C(49) | 3305(4)  | 1964(2)  | 8494(3)  | 49(1)  |
| C(50) | 2319(4)  | 2178(2)  | 7821(3)  | 55(1)  |
| C(51) | 1508(5)  | 2687(2)  | 8043(5)  | 74(1)  |

|       |          |          |          |       |
|-------|----------|----------|----------|-------|
| C(52) | 1669(6)  | 2962(3)  | 8966(5)  | 91(2) |
| C(53) | 2608(8)  | 2738(3)  | 9626(5)  | 92(2) |
| C(54) | 3470(6)  | 2245(2)  | 9404(3)  | 68(1) |
| C(55) | 4350(3)  | 234(2)   | 8091(3)  | 40(1) |
| C(56) | 4089(4)  | -222(2)  | 7255(2)  | 44(1) |
| C(57) | 3833(4)  | 58(2)    | 9097(3)  | 50(1) |
| C(58) | 4511(4)  | -518(2)  | 9529(3)  | 51(1) |
| C(59) | 4627(4)  | -592(2)  | 10625(3) | 46(1) |
| C(60) | 4302(4)  | -120(2)  | 11275(3) | 54(1) |
| C(61) | 4470(5)  | -218(3)  | 12274(3) | 66(1) |
| C(62) | 4947(5)  | -784(3)  | 12638(3) | 70(1) |
| C(63) | 5252(5)  | -1253(3) | 11992(4) | 74(1) |
| C(64) | 5074(5)  | -1160(2) | 10997(3) | 66(1) |
| C(65) | 10640(5) | -647(3)  | 6136(4)  | 89(2) |
| C(66) | 2235(4)  | 796(2)   | 7646(3)  | 40(1) |

**Table 3. Bond lengths for 3aa.**

| Atom Atom Length/Å;    | Atom Atom Length/Å;     | Atom Atom Length/Å                 |
|------------------------|-------------------------|------------------------------------|
| S(1)-O(1):1.420(3);    | S(1)-O(2):1.427(3);     | S(1)-N(1): 1.646(3);               |
| S(1)-C(1): 1.760(4);   | S(2)-O(5):1.425(4);     | S(2)-O(6): 1.426(4);               |
| S(2)-N(3): 1.639(3);   | S(2)-C(34):1.760(4);    | N(1)-C(7):1.474(5); N(1)-          |
| C(23):1.485(5);        | N(2)-C(33):1.141(5);    | N(3)-C(40):1.480(5); N(3)-         |
| C(56):1.495(5);        | N(4)-C(66):1.142(5);    | O(3)-C(25):1.212(5); O(4)-         |
| C(15):1.207(4);        | O(7)-C(48):1.201(5);    | O(8)-C(58):1.214(5); C(1)-         |
| C(6):1.383(6);         | C(1)-C(2):1.384(6);     | C(2)-C(3):1.373(6); C(2)-          |
| H(2):0.9300;           | C(3)-C(4) :1.381(6);    | C(3)-H(3):0.9300; C(4)-            |
| C(5):1.383(6) ;        | C(4)-C(32):1.500(6) ;   | C(5)-C(6) :1.360(6) C(5)-          |
| H(5):0.9300;           | C(6)-H(6):0.9300;       | C(7)-C(8):1.506(5); C(7)-          |
| C(14):1.557(5);        | C(7)-H(7) :0.9800;      | C(8)-C(13):1.383(6); C(8)-         |
| C(9):1.393(5);         | C(9)-C(10):1.397(7);    | C(9)-H(9):0.9300;                  |
| C(10)-C(11): 1.375(9); | C(10)-H(10): 0.9300;    | C(11)-C(12):1.334(9); C(11)-       |
| H(11):0.9300 ;         | C(12)-C(13):1.371(8);   | C(12)-H(12):0.9300; C(13)-         |
| H(13):0.9300 ;         | C(14)-C(33):1.476(5) ;  | C(14)-C(15):1.550(5); C(14)-C(22): |
| 1.554(5) ;             | C(15)-C(16):1.480(6) ;  | C(16)-C(21):1.387(6) ; C(16)-      |
| C(17):1.401(6);        | C(17)-C(18): 1.377(8) ; | C(17)-H(17): 0.9300 ; C(18)-       |
| C(19): 1.367(9) ;      | C(18)-H(18):0.9300;     | C(19)-C(20):1.367(8) ; C(19)-      |

|                   |                         |                                |
|-------------------|-------------------------|--------------------------------|
| H(19):0.9300 ;    | C(20)-C(21): 1.384(6) ; | C(20)-H(20):0.9300; C(21)-     |
| H(21):0.9300 ;    | C(22)-C(24):1.517(5) ;  | C(22)-C(23):1.532(5) ; C(22)-  |
| H(22): 0.9800 ;   | C(23)-H(23A):0.9700 ;   | C(23)-H(23B):0.9700 ; C(24)-   |
| C(25):1.507(5) ;  | C(24)-H(24A):0.9700;    | C(24)-H(24B):0.9700 ; C(25)-   |
| C(26):1.493(5) ;  | C(26)-C(31):1.377(6) ;  | C(26)-C(27):1.384(6) ; C(27)-  |
| C(28):1.387(6) ;  | C(27)-H(27):0.9300 ;    | C(28)-C(29):1.369(7) ; C(28)-  |
| H(28):0.9300 ;    | C(29)-C(30):1.376(7) ;  | C(29)-H(29):0.9300 ; C(30)-    |
| C(31):1.391(6) ;  | C(30)-H(30):0.9300 ;    | C(31)-H(31):0.9300 ; C(32)-    |
| H(32A):0.9600 ;   | C(32)-H(32B):0.9600 ;   | C(32)-H(32C):0.9600 ; C(34)-   |
| C(39):1.378(6) ;  | C(34)-C(35):1.379(6) ;  | C(35)-C(36):1.374(6) ; C(35)-  |
| H(35):0.9300 ;    | C(36)-C(37):1.371(7) ;  | C(36)-H(36):0.9300 ; C(37)-    |
| C(38):1.376(7) ;  | C(37)-C(65):1.499(6) ;  | C(38)-C(39):1.377(6) ; C(38)-  |
| H(38): 0.9300 ;   | C(39)-H(39):0.9300 ;    | C(40)-C(41):1.501(5) ; C(40)-  |
| C(47):1.563(5) ;  | C(40)-H(40):0.9800 ;    | C(41)-C(42):1.377(7) ; C(41)-  |
| C(46): 1.382(5) ; | C(42)-C(43):1.372(7) ;  | C(42)-H(42): 0.9300 ; C(43)-   |
| C(44):1.353(9) ;  | C(43)-H(43): 0.9300 ;   | C(44)-C(45):1.368(9) ; C(44)-  |
| H(44): 0.9300 ;   | C(45)-C(46): 1.377(7) ; | C(45)-H(45):0.9300 ; C(46)-    |
| H(46):0.9300 ;    | C(47)-C(66): 1.475(5) ; | C(47)-C(48):1.542(5) ; C(47)-  |
| C(55): 1.546(5) ; | C(48)-C(49):1.505(6) ;  | C(49)-C(54):1.377(6) ; C(49)-  |
| C(50):1.377(6) ;  | C(50)-C(51);1.381(6) ;  | C(50)-H(50):0.9300 ; C(51)-    |
| C(52) :1.386(8) ; | C(51)-H(51) :0.9300 ;   | C(52)-C(53) :1.344(9) ; C(52)- |
| H(52) :0.9300 ;   | C(53)-C(54) :1.386(8) ; | C(53)-H(53) : 0.9300 ; C(54)-  |
| H(54) : 0.9300 ;  | C(55)-C(56) :1.508(5) ; | C(55)-C(57) :1.522(5) ; C(55)- |
| H(55) :0.9800 ;   | C(56)-H(56A):0.9700 ;   | C(56)-H(56B) :0.9700 ; C(57)-  |
| C(58) :1.500(6) ; | C(57)-H(57A) :0.9700 ;  | C(57)-H(57B) :0.9700 ; C(58)-  |
| C(59) :1.496(5) ; | C(59)-C(64) :1.376(6) ; | C(59)-C(60):1.382(6) ; C(60)-  |
| C(61):1.375(6) ;  | C(60)-H(60):0.9300 ;    | C(61)-C(62):1.377(7) ; C(61)-  |
| H(61):0.9300 ;    | C(63)-C(64):1.370(6) ;  | C(63)-H(63):0.9300 ; C(64)-    |
| H(64):0.9300 ;    | C(65)-H(65A):0.9600 ;   | C(65)-H(65B):0.9600 ; C(65)-   |
| H(65C): 0.9600    |                         |                                |



**Table 4. Bond angles for 3aa.**

| <b>Atom Atom Atom Angle/° ;</b> | <b>Atom Atom Atom Angle/° ;</b> |
|---------------------------------|---------------------------------|
| O(1)-S(1)-O(2):120.5(2);        | O(1)-S(1)-N(1):106.92(18) ;     |
| O(2)-S(1)-N(1):105.86(18)       | O(1)-S(1)-C(1):107.95(19);      |
| O(2)-S(1)-C(1):107.97(19);      | N(1)-S(1)-C(1):106.90(16)       |
| O(5)-S(2)-O(6):120.6(2);        | O(5)-S(2)-N(3):105.70(19) ;     |
| O(6)-S(2)-N(3):107.21(19)       | O(5)-S(2)-C(34):107.1(2);       |
| O(6)-S(2)-C(34):108.1(2);       | N(3)-S(2)-C(34):107.54(16)      |
| C(7)-N(1)-C(23):110.2(3) ;      | C(7)-N(1)-S(1):120.6(2) ;       |
| C(23)-N(1)-S(1):115.9(3)        | C(40)-N(3)-C(56):110.0(3);      |
| C(40)-N(3)-S(2):121.1(3) ;      | C(56)-N(3)-S(2):117.2(3)        |
| C(6)-C(1)-C(2):120.0(3) ;       | C(6)-C(1)-S(1):119.9(3) ;       |
| C(2)-C(1)-S(1):120.1(3)         | C(3)-C(2)-C(1):119.2(4) ;       |
| C(3)-C(2)-H(2):120.4;           | C(1)-C(2)-H(2):120.4;           |
| C(2)-C(3)-C(4): 121.5(4) ;      | C(2)-C(3)-H(3):119.3;           |
| C(4)-C(3)-H(3):119.3;           | C(3)-C(4)-C(5):117.9(4) ;       |
| C(3)-C(4)-C(32):121.0(4);       | C(5)-C(4)-C(32):121.1(4) ;      |
| C(6)-C(5)-C(4):121.8(4) ;       | C(6)-C(5)-H(5):119.1 ;          |
| C(4)-C(5)-H(5):119.1            | C(5)-C(6)-C(1):119.5(4);        |
| C(5)-C(6)-H(6):120.2;           | C(1)-C(6)-H(6):120.2;           |
| N(1)-C(7)-C(8):117.1(3);        | N(1)-C(7)-C(14):100.4(3);       |
| C(8)-C(7)-C(14):114.5(3);       | N(1)-C(7)-H(7):108.1 ;          |
| C(8)-C(7)-H(7):108.1            | C(14)-C(7)-H(7):108.1;          |
| C(13)-C(8)-C(9):119.2(4) ;      | C(13)-C(8)-C(7):117.8(4) ;      |
| C(9)-C(8)-C(7):122.8(4)         | C(8)-C(9)-C(10):118.2(5);       |
| C(8)-C(9)-H(9):120.9;           | C(10)-C(9)-H(9):120.9;          |
| C(11)-C(10)-C(9):121.0(5);      | C(11)-C(10)-H(10):119.5;        |
| C(9)-C(10)-H(10):119.5;         | C(12)-C(11)-C(10):120.1(5);     |
| C(12)-C(11)-H(11):120.0;        | C(10)-C(11)-H(11):120.0;        |
| C(11)-C(12)-C(13):120.9(6);     | C(11)-C(12)-H(12):119.6;        |

C(13)-C(12)-H(12):119.6; C(12)-C(13)-C(8):120.7(5);  
C(12)-C(13)-H(13):119.7; C(8)-C(13)-H(13):119.7;  
C(33)-C(14)-C(15):113.4(3); C(33)-C(14)-C(22):107.9(3);  
C(15)-C(14)-C(22):111.7(3) C(33)-C(14)-C(7):110.9(3);  
C(15)-C(14)-C(7):112.1(3); C(22)-C(14)-C(7):100.0(3);  
O(4)-C(15)-C(16):122.1(4); O(4)-C(15)-C(14):116.6(3) ;  
C(16)-C(15)-C(14):121.4(3); C(21)-C(16)-C(17):119.4(5);  
C(21)-C(16)-C(15):123.2(4); C(17)-C(16)-C(15):117.4(4)  
C(18)-C(17)-C(16):118.9(6); C(18)-C(17)-H(17):120.6;  
C(16)-C(17)-H(17):120.6 ; C(19)-C(18)-C(17):120.9(5);  
C(19)-C(18)-H(18):119.5 ; C(17)-C(18)-H(18):119.5 ;  
C(18)-C(19)-C(20):121.0(5); C(18)-C(19)-H(19):119.5;  
C(20)-C(19)-H(19):119.5; C(19)-C(20)-C(21):119.2(5);  
C(19)-C(20)-H(20):120.4; C(21)-C(20)-H(20):120.4;  
C(20)-C(21)-C(16):120.6(5); C(20)-C(21)-H(21):119.7;  
C(16)-C(21)-H(21):119.7 ; C(24)-C(22)-C(23):116.6(3);  
C(24)-C(22)-C(14):114.4(3); C(23)-C(22)-C(14):101.7(3)  
C(24)-C(22)-H(22):107.9; C(23)-C(22)-H(22):107.9;  
C(14)-C(22)-H(22):107.9; N(1)-C(23)-C(22):104.6(3);  
N(1)-C(23)-H(23A):110.8; C(22)-C(23)-H(23A):110.8 ;  
N(1)-C(23)-H(23B):110.8; C(22)-C(23)-H(23B):110.8;  
H(23A)-C(23)-H(23B):108.9 ; C(25)-C(24)-C(22):113.1(3);  
C(25)-C(24)-H(24A):109.0; C(22)-C(24)-H(24A):109.0 ;  
C(25)-C(24)-H(24B):109.0; C(22)-C(24)-H(24B):109.0;  
H(24A)-C(24)-H(24B):107.8 ; O(3)-C(25)-C(26):120.7(4);  
O(3)-C(25)-C(24):120.6(3); C(26)-C(25)-C(24):118.7(3);  
C(31)-C(26)-C(27):118.8(4); C(31)-C(26)-C(25):123.3(4);  
C(27)-C(26)-C(25):117.9(4); C(26)-C(27)-C(28):120.4(4);  
C(26)-C(27)-H(27):119.8; C(28)-C(27)-H(27):119.8;  
C(29)-C(28)-C(27):120.3(5); C(29)-C(28)-H(28):119.9;

C(27)-C(28)-H(28):119.9; C(28)-C(29)-C(30):120.2(4) ;  
 C(28)-C(29)-H(29) :119.9 ; C(30)-C(29)-H(29):119.9 ;  
 C(29)-C(30)-C(31):119.4(5); C(29)-C(30)-H(30):120.3;  
 C(31)-C(30)-H(30):120.3; C(26)-C(31)-C(30):121.0(5);  
 C(26)-C(31)-H(31):119.5; C(30)-C(31)-H(31):119.5 ;  
 C(4)-C(32)-H(32A):109.5; C(4)-C(32)-H(32B):109.5;  
 H(32A)-C(32)-H(32B):109.5; C(4)-C(32)-H(32C):109.5;  
 H(32A)-C(32)-H(32C):109.5; H(32B)-C(32)-H(32C):109.5 ;  
 N(2)-C(33)-C(14):175.3(4); C(39)-C(34)-C(35):120.1(4);  
 C(39)-C(34)-S(2):120.3(3); C(35)-C(34)-S(2):119.6(3);  
 C(36)-C(35)-C(34):119.1(5); C(36)-C(35)-H(35):120.5 ;  
 C(34)-C(35)-H(35):120.5; C(37)-C(36)-C(35):122.1(5);  
 C(37)-C(36)-H(36):118.9 ; C(35)-C(36)-H(36):118.9 ; C(36)-C(37)-  
 C(38):117.8(4) ; C(36)-C(37)-C(65):122.0(5);  
 C(38)-C(37)-C(65):120.3(5) ; C(37)-C(38)-C(39):121.6(5); C(37)-  
 C(38)-H(38):119.2; C(39)-C(38)-H(38):119.2 ; C(38)-C(39)-  
 C(34):119.3(4); C(38)-C(39)-H(39):120.4;  
 C(34)-C(39)-H(39):120.4; N(3)-C(40)-C(41):117.1(3) ; N(3)-  
 C(40)-C(47):100.1(3) ; C(41)-C(40)-C(47):114.5(3) ; N(3)-C(40)-  
 H(40):108.2 ; C(41)-C(40)-H(40):108.2 ;  
 C(47)-C(40)-H(40):108.2; C(42)-C(41)-C(46):119.2(5); C(42)-C(41)-  
 C(40):117.8(4); C(46)-C(41)-C(40):122.6(4); C(43)-C(42)-C(41):120.7(5) ;  
 C(43)-C(42)-H(42):119.6 ;  
 C(41)-C(42)-H(42):119.6; C(44)-C(43)-C(42):119.6(6) ; C(44)-  
 C(43)-H(43):120.2 ; C(42)-C(43)-H(43):120.2 ; C(43)-C(44)-  
 C(45):120.7(6) ; C(43)-C(44)-H(44):119.6 ;  
 C(45)-C(44)-H(44):119.6 ; C(44)-C(45)-C(46): 120.2(5) ; C(44)-  
 C(45)-H(45):119.9; C(46)-C(45)-H(45):119.9 ; C(45)-C(46)-  
 C(41):119.4(5) ; C(45)-C(46)-H(46):120.3 ;  
 C(41)-C(46)-H(46):120.3 ; C(66)-C(47)-C(48):112.7(3) ; C(66)-C(47)-

C(55):107.8(3); C(48)-C(47)-C(55):112.4(3); C(66)-C(47)-C(40):111.0(3);  
C(48)-C(47)-C(40):111.9(3);  
C(55)-C(47)-C(40):100.3(3); O(7)-C(48)-C(49):121.6(4); O(7)-C(48)-  
C(47):117.3(4); C(49)-C(48)-C(47):121.1(3); C(54)-C(49)-C(50):120.4(4);  
C(54)-C(49)-C(48):117.6(4);  
C(50)-C(49)-C(48):122.1(4); C(49)-C(50)-C(51):120.4(5); C(49)-C(50)-  
H(50):119.8; C(51)-C(50)-H(50):119.8; C(50)-C(51)-C(52):118.9(5);  
C(50)-C(51)-H(51):120.6;  
C(52)-C(51)-H(51):120.6; C(53)-C(52)-C(51):120.2(5); C(53)-C(52)-  
H(52):119.9; C(52)-C(53)-C(54):121.8(6); C(52)-C(53)-H(53):119.1;  
C(54)-C(53)-H(53):119.1;  
C(49)-C(54)-C(53):118.3(5); C(49)-C(54)-H(54):120.9; C(53)-C(54)-  
H(54):120.9; C(56)-C(55)-C(57):117.7(3); C(56)-C(55)-C(47):102.9(3);  
C(57)-C(55)-C(47):113.7(3);  
C(56)-C(55)-H(55):107.3; C(57)-C(55)-H(55):107.3; C(47)-C(55)-  
H(55):107.3; N(3)-C(56)-C(55):104.7(3); N(3)-C(56)-H(56A):110.8;  
C(55)-C(56)-H(56A):110.8;  
N(3)-C(56)-H(56B):110.8; C(55)-C(56)-H(56B):110.8; H(56A)-  
C(56)-H(56B):108.9; C(58)-C(57)-C(55):113.3(3); C(58)-C(57)-  
H(57A):108.9; C(55)-C(57)-H(57A):108.9;  
C(58)-C(57)-H(57B):108.9; C(55)-C(57)-H(57B):108.9; H(57A)-C(57)-  
H(57B):107.7; O(8)-C(58)-C(59):119.9(4); O(8)-C(58)-C(57):120.8(4);  
C(59)-C(58)-C(57):119.3(4);  
C(64)-C(59)-C(60):118.7(4); C(64)-C(59)-C(58):117.9(4); C(60)-C(59)-  
C(58):123.3(4); C(61)-C(60)-C(59):120.0(4); C(61)-C(60)-H(60):120.0;  
C(59)-C(60)-H(60):120.0;  
C(60)-C(61)-C(62):120.8(5); C(60)-C(61)-H(61):119.6; C(62)-C(61)-  
H(61):119.6; C(63)-C(62)-C(61):119.1(4); C(63)-C(62)-H(62):120.4;  
C(61)-C(62)-H(62):120.4;  
C(64)-C(63)-C(62):120.3(5); C(64)-C(63)-H(63):119.9; C(62)-C(63)-

H(63):119.9 ; C(63)-C(64)-C(59):121.1(5) ; C(63)-C(64)-H(64):119.5 ;  
 C(59)-C(64)-H(64):119.5 ;  
 C(37)-C(65)-H(65A):109.5 ; C(37)-C(65)-H(65B): 109.5 ; H(65A)-C(65)-  
 H(65B):109.5 ; C(37)-C(65)-H(65C):109.5 ; H(65A)-C(65)-H(65C):109.5 ;  
 H(65B)-C(65)-H(65C):109.5 ;  
 N(4)-C(66)-C(47):175.7(4)

**Symmetry transformations used to generate equivalent atoms:**

**Table 5. Anisotropic displacement parameters ( $\text{\AA}^2 \times 10^3$ ) for 3aa. The anisotropic displacement factor exponent takes the form:  $-2 \pi^2 [ h^2 a^{*2} U_{11} + \dots + 2 h k a^* b^* U_{12} ]$**

| Atom  | U11    | U22    | U33   | U23    | U13    | U12   |
|-------|--------|--------|-------|--------|--------|-------|
| S(1)  | 40(1)  | 66(1)  | 39(1) | -14(1) | -2(1)  | 8(1)  |
| S(2)  | 47(1)  | 72(1)  | 39(1) | -15(1) | -2(1)  | 6(1)  |
| N(1)  | 40(2)  | 51(2)  | 34(2) | -4(2)  | 2(1)   | 2(2)  |
| N(2)  | 41(2)  | 52(2)  | 68(2) | -1(2)  | 6(2)   | -4(2) |
| N(3)  | 43(2)  | 55(2)  | 36(2) | -6(2)  | 0(1)   | 5(2)  |
| N(4)  | 45(2)  | 56(2)  | 70(2) | -6(2)  | 3(2)   | 4(2)  |
| O(1)  | 67(2)  | 96(3)  | 34(1) | -5(2)  | -3(1)  | 26(2) |
| O(2)  | 47(2)  | 73(2)  | 76(2) | -36(2) | -1(1)  | -3(2) |
| O(3)  | 97(2)  | 48(2)  | 45(2) | -5(1)  | -1(2)  | 20(2) |
| O(4)  | 52(2)  | 58(2)  | 76(2) | -5(2)  | -18(1) | -9(1) |
| O(5)  | 51(2)  | 86(3)  | 75(2) | -40(2) | -2(2)  | -6(2) |
| O(6)  | 77(2)  | 108(3) | 36(1) | -2(2)  | -1(1)  | 25(2) |
| O(7)  | 57(2)  | 58(2)  | 85(2) | -8(2)  | -28(2) | -2(2) |
| O(8)  | 134(3) | 51(2)  | 48(2) | -5(2)  | 9(2)   | 33(2) |
| C(1)  | 41(2)  | 50(2)  | 41(2) | -4(2)  | 4(1)   | 4(2)  |
| C(2)  | 44(2)  | 44(2)  | 65(2) | 0(2)   | 7(2)   | -4(2) |
| C(3)  | 54(2)  | 51(3)  | 64(3) | 9(2)   | 4(2)   | 13(2) |
| C(4)  | 47(2)  | 63(3)  | 56(2) | 1(2)   | 8(2)   | 0(2)  |
| C(5)  | 54(2)  | 52(3)  | 92(3) | 12(3)  | 19(2)  | -3(2) |
| C(6)  | 51(2)  | 53(3)  | 69(3) | 15(2)  | 11(2)  | 9(2)  |
| C(7)  | 32(2)  | 46(2)  | 40(2) | -2(2)  | 2(1)   | 2(2)  |
| C(8)  | 50(2)  | 55(2)  | 35(2) | 4(2)   | 7(2)   | 9(2)  |
| C(9)  | 51(2)  | 78(3)  | 46(2) | 3(2)   | -1(2)  | 16(2) |
| C(10) | 72(3)  | 120(6) | 57(3) | 16(3)  | -4(2)  | 36(4) |
| C(11) | 133(6) | 87(5)  | 69(3) | 30(3)  | 12(4)  | 48(4) |
| C(12) | 121(5) | 66(4)  | 83(4) | 26(3)  | 16(4)  | 6(4)  |
| C(13) | 79(3)  | 60(3)  | 59(3) | 14(2)  | 6(2)   | 0(3)  |
| C(14) | 34(2)  | 37(2)  | 39(2) | 0(2)   | -1(1)  | 0(2)  |

|       |        |        |        |        |        |        |
|-------|--------|--------|--------|--------|--------|--------|
| C(15) | 49(2)  | 40(2)  | 39(2)  | 4(2)   | -3(2)  | -3(2)  |
| C(16) | 67(2)  | 37(2)  | 44(2)  | 1(2)   | 8(2)   | -7(2)  |
| C(17) | 118(4) | 50(3)  | 61(3)  | -11(3) | 2(3)   | -13(3) |
| C(18) | 170(7) | 52(3)  | 72(4)  | -22(3) | 30(4)  | -12(4) |
| C(19) | 123(5) | 37(3)  | 118(5) | -6(3)  | 62(4)  | 2(3)   |
| C(20) | 68(3)  | 35(2)  | 110(4) | 11(3)  | 29(3)  | 7(2)   |
| C(21) | 62(2)  | 37(2)  | 68(3)  | 3(2)   | 13(2)  | -1(2)  |
| C(22) | 36(2)  | 38(2)  | 38(2)  | -2(2)  | 1(1)   | 1(2)   |
| C(23) | 49(2)  | 39(2)  | 42(2)  | -4(2)  | 4(2)   | 0(2)   |
| C(24) | 50(2)  | 45(2)  | 38(2)  | -2(2)  | 2(2)   | 4(2)   |
| C(25) | 48(2)  | 38(2)  | 43(2)  | -2(2)  | -3(2)  | -1(2)  |
| C(26) | 43(2)  | 46(2)  | 42(2)  | 2(2)   | -3(2)  | -3(2)  |
| C(27) | 71(3)  | 50(3)  | 50(2)  | 3(2)   | -6(2)  | 6(2)   |
| C(28) | 81(3)  | 63(3)  | 58(3)  | 17(2)  | -11(2) | 3(3)   |
| C(29) | 87(3)  | 86(4)  | 42(2)  | 14(3)  | 2(2)   | -4(3)  |
| C(30) | 84(3)  | 78(4)  | 47(2)  | 3(3)   | 11(2)  | 5(3)   |
| C(31) | 62(2)  | 66(3)  | 43(2)  | 3(2)   | 4(2)   | 7(2)   |
| C(32) | 44(2)  | 90(4)  | 85(3)  | 6(3)   | -1(2)  | 3(2)   |
| C(33) | 45(2)  | 32(2)  | 40(2)  | -2(2)  | 1(1)   | 4(2)   |
| C(34) | 45(2)  | 53(3)  | 47(2)  | -13(2) | 5(2)   | 2(2)   |
| C(35) | 56(2)  | 54(3)  | 89(3)  | 3(3)   | 14(2)  | 2(2)   |
| C(36) | 53(2)  | 70(4)  | 104(4) | -8(3)  | 18(2)  | -14(3) |
| C(37) | 45(2)  | 72(3)  | 69(3)  | -17(3) | 3(2)   | 1(2)   |
| C(38) | 57(2)  | 52(3)  | 80(3)  | -5(2)  | -5(2)  | 8(2)   |
| C(39) | 52(2)  | 49(3)  | 74(3)  | -12(2) | 4(2)   | -10(2) |
| C(40) | 33(2)  | 55(2)  | 40(2)  | 0(2)   | -2(1)  | 0(2)   |
| C(41) | 49(2)  | 63(3)  | 40(2)  | 2(2)   | 3(2)   | 2(2)   |
| C(42) | 72(3)  | 69(3)  | 68(3)  | 19(3)  | 1(2)   | -5(3)  |
| C(43) | 136(6) | 72(4)  | 91(4)  | 37(4)  | -9(4)  | -5(4)  |
| C(44) | 121(5) | 86(5)  | 90(4)  | 38(4)  | -6(4)  | 28(4)  |
| C(45) | 77(3)  | 115(5) | 56(3)  | 14(3)  | -9(2)  | 29(3)  |
| C(46) | 52(2)  | 80(3)  | 47(2)  | 5(2)   | -4(2)  | 6(2)   |
| C(47) | 37(2)  | 40(2)  | 34(2)  | -3(2)  | -4(1)  | 5(2)   |
| C(48) | 51(2)  | 44(2)  | 44(2)  | 2(2)   | -7(2)  | -3(2)  |
| C(49) | 58(2)  | 36(2)  | 54(2)  | -6(2)  | 9(2)   | -5(2)  |
| C(50) | 52(2)  | 42(2)  | 72(3)  | -6(2)  | 3(2)   | 2(2)   |
| C(51) | 62(3)  | 47(3)  | 115(4) | 2(3)   | 17(3)  | 4(2)   |
| C(52) | 87(4)  | 55(3)  | 134(6) | -19(4) | 51(4)  | 4(3)   |
| C(53) | 133(5) | 65(4)  | 81(4)  | -28(3) | 46(4)  | -15(4) |
| C(54) | 96(4)  | 52(3)  | 58(3)  | -6(2)  | 12(2)  | -15(3) |
| C(55) | 38(2)  | 43(2)  | 39(2)  | -2(2)  | -3(1)  | 6(2)   |
| C(56) | 46(2)  | 46(2)  | 41(2)  | -3(2)  | 1(2)   | 3(2)   |
| C(57) | 60(2)  | 47(2)  | 42(2)  | -1(2)  | 4(2)   | 10(2)  |
| C(58) | 62(2)  | 44(2)  | 47(2)  | -3(2)  | 7(2)   | 6(2)   |

|       |       |        |        |        |       |       |
|-------|-------|--------|--------|--------|-------|-------|
| C(59) | 47(2) | 46(2)  | 47(2)  | 3(2)   | 8(2)  | 1(2)  |
| C(60) | 66(2) | 52(3)  | 46(2)  | 0(2)   | 6(2)  | 9(2)  |
| C(61) | 85(3) | 66(3)  | 46(2)  | -6(2)  | 8(2)  | 3(3)  |
| C(62) | 75(3) | 92(4)  | 43(2)  | 14(3)  | 9(2)  | -1(3) |
| C(63) | 86(3) | 71(3)  | 63(3)  | 22(3)  | 4(2)  | 16(3) |
| C(64) | 90(3) | 51(3)  | 59(3)  | 6(2)   | 9(2)  | 15(3) |
| C(65) | 48(2) | 111(5) | 109(4) | -19(4) | 3(3)  | 2(3)  |
| C(66) | 42(2) | 37(2)  | 41(2)  | -4(2)  | -2(1) | 4(2)  |

**Table 5. Hydrogen coordinates ( $\text{\AA} \times 10^4$ ) and isotropic displacement parameters ( $\text{\AA}^2 \times 10^3$ ) for 3aa.**

| Atom   | x     | y     | z     | U(eq) |
|--------|-------|-------|-------|-------|
| H(2)   | 6653  | 2932  | 2192  | 61    |
| H(3)   | 4322  | 3049  | 1956  | 67    |
| H(5)   | 3745  | 1322  | 2987  | 78    |
| H(6)   | 6055  | 1192  | 3226  | 69    |
| H(7)   | 7510  | 885   | 1660  | 47    |
| H(9)   | 10976 | 849   | 2664  | 70    |
| H(10)  | 11866 | 7     | 3585  | 99    |
| H(11)  | 10576 | -881  | 3809  | 115   |
| H(12)  | 8430  | -950  | 3135  | 107   |
| H(13)  | 7493  | -135  | 2235  | 79    |
| H(17)  | 8037  | -478  | -1458 | 92    |
| H(18)  | 9390  | -1306 | -1931 | 117   |
| H(19)  | 11227 | -1624 | -963  | 110   |
| H(20)  | 11775 | -1125 | 500   | 85    |
| H(21)  | 10531 | -251  | 948   | 66    |
| H(22)  | 7316  | 1444  | 123   | 45    |
| H(23A) | 9605  | 2159  | 788   | 52    |
| H(23B) | 8046  | 2285  | 986   | 52    |
| H(24A) | 9715  | 1683  | -909  | 53    |
| H(24B) | 8480  | 1282  | -1333 | 53    |
| H(27)  | 7280  | 3204  | -2327 | 69    |
| H(28)  | 7188  | 3403  | -4002 | 81    |
| H(29)  | 7881  | 2652  | -5089 | 86    |
| H(30)  | 8678  | 1693  | -4514 | 83    |
| H(31)  | 8744  | 1488  | -2836 | 69    |
| H(32A) | 2048  | 2705  | 2159  | 110   |
| H(32B) | 1802  | 2115  | 2819  | 110   |
| H(32C) | 1964  | 2035  | 1682  | 110   |
| H(35)  | 7033  | 588   | 5244  | 79    |
| H(36)  | 9322  | 385   | 5543  | 90    |
| H(38)  | 8478  | -1377 | 6251  | 76    |

|        |       |       |       |     |
|--------|-------|-------|-------|-----|
| H(39)  | 6175  | -1191 | 5958  | 70  |
| H(40)  | 5297  | 902   | 6665  | 51  |
| H(42)  | 5264  | 1936  | 6162  | 84  |
| H(43)  | 4291  | 2769  | 5314  | 120 |
| H(44)  | 2165  | 2667  | 4573  | 119 |
| H(45)  | 1011  | 1731  | 4626  | 100 |
| H(46)  | 1961  | 889   | 5482  | 71  |
| H(50)  | 2199  | 1979  | 7215  | 66  |
| H(51)  | 865   | 2842  | 7582  | 89  |
| H(52)  | 1125  | 3303  | 9128  | 109 |
| H(53)  | 2682  | 2919  | 10249 | 110 |
| H(54)  | 4143  | 2108  | 9858  | 82  |
| H(55)  | 5345  | 291   | 8168  | 48  |
| H(56A) | 4824  | -528  | 7230  | 53  |
| H(56B) | 3229  | -443  | 7329  | 53  |
| H(57A) | 3992  | 407   | 9545  | 60  |
| H(57B) | 2852  | -13   | 9037  | 60  |
| H(60)  | 3970  | 263   | 11038 | 65  |
| H(61)  | 4260  | 103   | 12708 | 79  |
| H(62)  | 5060  | -847  | 13314 | 84  |
| H(63)  | 5581  | -1637 | 12230 | 88  |
| H(64)  | 5257  | -1487 | 10567 | 80  |
| H(65A) | 11181 | -328  | 5839  | 134 |
| H(65B) | 10870 | -1050 | 5870  | 134 |
| H(65C) | 10825 | -648  | 6836  | 134 |



**Table 6. Torsion angles for 3aa.**

| A     | B     | C     | D     | Angle/°   |
|-------|-------|-------|-------|-----------|
| O(1)  | S(1)  | N(1)  | C(7)  | 44.7(3)   |
| O(2)  | S(1)  | N(1)  | C(7)  | 174.4(3)  |
| C(1)  | S(1)  | N(1)  | C(7)  | -70.7(3)  |
| O(1)  | S(1)  | N(1)  | C(23) | -178.1(3) |
| O(2)  | S(1)  | N(1)  | C(23) | -48.4(3)  |
| C(1)  | S(1)  | N(1)  | C(23) | 66.5(3)   |
| O(5)  | S(2)  | N(3)  | C(40) | -168.9(3) |
| O(6)  | S(2)  | N(3)  | C(40) | -39.1(3)  |
| C(34) | S(2)  | N(3)  | C(40) | 77.0(3)   |
| O(5)  | S(2)  | N(3)  | C(56) | 51.6(3)   |
| O(6)  | S(2)  | N(3)  | C(56) | -178.5(3) |
| C(34) | S(2)  | N(3)  | C(56) | -62.5(3)  |
| O(1)  | S(1)  | C(1)  | C(6)  | -29.5(4)  |
| O(2)  | S(1)  | C(1)  | C(6)  | -161.3(3) |
| N(1)  | S(1)  | C(1)  | C(6)  | 85.2(4)   |
| O(1)  | S(1)  | C(1)  | C(2)  | 151.2(3)  |
| O(2)  | S(1)  | C(1)  | C(2)  | 19.4(4)   |
| N(1)  | S(1)  | C(1)  | C(2)  | -94.1(3)  |
| C(6)  | C(1)  | C(2)  | C(3)  | -1.7(6)   |
| S(1)  | C(1)  | C(2)  | C(3)  | 177.7(3)  |
| C(1)  | C(2)  | C(3)  | C(4)  | -0.1(7)   |
| C(2)  | C(3)  | C(4)  | C(5)  | 1.8(7)    |
| C(2)  | C(3)  | C(4)  | C(32) | -179.3(4) |
| C(3)  | C(4)  | C(5)  | C(6)  | -1.9(7)   |
| C(32) | C(4)  | C(5)  | C(6)  | 179.2(5)  |
| C(4)  | C(5)  | C(6)  | C(1)  | 0.2(7)    |
| C(2)  | C(1)  | C(6)  | C(5)  | 1.6(6)    |
| S(1)  | C(1)  | C(6)  | C(5)  | -177.7(4) |
| C(23) | N(1)  | C(7)  | C(8)  | 154.4(3)  |
| S(1)  | N(1)  | C(7)  | C(8)  | -66.2(4)  |
| C(23) | N(1)  | C(7)  | C(14) | 29.9(3)   |
| S(1)  | N(1)  | C(7)  | C(14) | 169.2(2)  |
| N(1)  | C(7)  | C(8)  | C(13) | 149.0(4)  |
| C(14) | C(7)  | C(8)  | C(13) | -93.8(4)  |
| N(1)  | C(7)  | C(8)  | C(9)  | -35.8(5)  |
| C(14) | C(7)  | C(8)  | C(9)  | 81.3(5)   |
| C(13) | C(8)  | C(9)  | C(10) | 1.0(6)    |
| C(7)  | C(8)  | C(9)  | C(10) | -174.1(4) |
| C(8)  | C(9)  | C(10) | C(11) | -0.3(8)   |
| C(9)  | C(10) | C(11) | C(12) | -0.1(9)   |
| C(10) | C(11) | C(12) | C(13) | -0.2(10)  |

|                         |           |
|-------------------------|-----------|
| C(11)-C(12)-C(13)-C(8)  | 0.9(9)    |
| C(9)-C(8)-C(13)-C(12)   | -1.3(7)   |
| C(7)-C(8)-C(13)-C(12)   | 174.0(4)  |
| N(1)-C(7)-C(14)-C(33)   | 68.4(3)   |
| C(8)-C(7)-C(14)-C(33)   | -58.0(4)  |
| N(1)-C(7)-C(14)-C(15)   | -163.7(3) |
| C(8)-C(7)-C(14)-C(15)   | 70.0(4)   |
| N(1)-C(7)-C(14)-C(22)   | -45.2(3)  |
| C(8)-C(7)-C(14)-C(22)   | -171.6(3) |
| C(33)-C(14)-C(15)-O(4)  | -160.8(3) |
| C(22)-C(14)-C(15)-O(4)  | -38.7(5)  |
| C(7)-C(14)-C(15)-O(4)   | 72.6(4)   |
| C(33)-C(14)-C(15)-C(16) | 16.9(5)   |
| C(22)-C(14)-C(15)-C(16) | 139.0(3)  |
| C(7)-C(14)-C(15)-C(16)  | -109.7(4) |
| O(4)-C(15)-C(16)-C(21)  | -147.0(4) |
| C(14)-C(15)-C(16)-C(21) | 35.4(6)   |
| O(4)-C(15)-C(16)-C(17)  | 31.9(6)   |
| C(14)-C(15)-C(16)-C(17) | -145.7(4) |
| C(21)-C(16)-C(17)-C(18) | -2.6(7)   |
| C(15)-C(16)-C(17)-C(18) | 178.4(4)  |
| C(16)-C(17)-C(18)-C(19) | 2.5(9)    |
| C(17)-C(18)-C(19)-C(20) | -0.1(9)   |
| C(18)-C(19)-C(20)-C(21) | -2.2(8)   |
| C(19)-C(20)-C(21)-C(16) | 2.0(7)    |
| C(17)-C(16)-C(21)-C(20) | 0.4(7)    |
| C(15)-C(16)-C(21)-C(20) | 179.3(4)  |
| C(33)-C(14)-C(22)-C(24) | 55.4(4)   |
| C(15)-C(14)-C(22)-C(24) | -69.9(4)  |
| C(7)-C(14)-C(22)-C(24)  | 171.3(3)  |
| C(33)-C(14)-C(22)-C(23) | -71.3(3)  |
| C(15)-C(14)-C(22)-C(23) | 163.5(3)  |
| C(7)-C(14)-C(22)-C(23)  | 44.7(3)   |
| C(7)-N(1)-C(23)-C(22)   | -1.9(4)   |
| S(1)-N(1)-C(23)-C(22)   | -143.3(2) |
| C(24)-C(22)-C(23)-N(1)  | -152.3(3) |
| C(14)-C(22)-C(23)-N(1)  | -27.1(3)  |
| C(23)-C(22)-C(24)-C(25) | -63.9(4)  |
| C(14)-C(22)-C(24)-C(25) | 177.6(3)  |
| C(22)-C(24)-C(25)-O(3)  | 20.1(5)   |
| C(22)-C(24)-C(25)-C(26) | -162.1(3) |
| O(3)-C(25)-C(26)-C(31)  | -174.5(4) |
| C(24)-C(25)-C(26)-C(31) | 7.7(6)    |
| O(3)-C(25)-C(26)-C(27)  | 5.4(6)    |

|                         |           |
|-------------------------|-----------|
| C(24)-C(25)-C(26)-C(27) | -172.4(4) |
| C(31)-C(26)-C(27)-C(28) | 0.0(6)    |
| C(25)-C(26)-C(27)-C(28) | -179.9(4) |
| C(26)-C(27)-C(28)-C(29) | -0.2(7)   |
| C(27)-C(28)-C(29)-C(30) | 0.0(8)    |
| C(28)-C(29)-C(30)-C(31) | 0.5(8)    |
| C(27)-C(26)-C(31)-C(30) | 0.4(6)    |
| C(25)-C(26)-C(31)-C(30) | -179.7(4) |
| C(29)-C(30)-C(31)-C(26) | -0.7(7)   |
| O(5)-S(2)-C(34)-C(39)   | -18.2(4)  |
| O(6)-S(2)-C(34)-C(39)   | -149.5(3) |
| N(3)-S(2)-C(34)-C(39)   | 95.0(4)   |
| O(5)-S(2)-C(34)-C(35)   | 162.5(4)  |
| O(6)-S(2)-C(34)-C(35)   | 31.1(4)   |
| N(3)-S(2)-C(34)-C(35)   | -84.3(4)  |
| C(39)-C(34)-C(35)-C(36) | 0.4(7)    |
| S(2)-C(34)-C(35)-C(36)  | 179.8(4)  |
| C(34)-C(35)-C(36)-C(37) | 0.0(8)    |
| C(35)-C(36)-C(37)-C(38) | -0.3(8)   |
| C(35)-C(36)-C(37)-C(65) | -179.0(5) |
| C(36)-C(37)-C(38)-C(39) | 0.3(8)    |
| C(65)-C(37)-C(38)-C(39) | 179.0(5)  |
| C(37)-C(38)-C(39)-C(34) | 0.0(7)    |
| C(35)-C(34)-C(39)-C(38) | -0.4(7)   |
| S(2)-C(34)-C(39)-C(38)  | -179.7(3) |
| C(56)-N(3)-C(40)-C(41)  | -153.7(3) |
| S(2)-N(3)-C(40)-C(41)   | 64.2(4)   |
| C(56)-N(3)-C(40)-C(47)  | -29.4(3)  |
| S(2)-N(3)-C(40)-C(47)   | -171.4(2) |
| N(3)-C(40)-C(41)-C(42)  | -150.1(4) |
| C(47)-C(40)-C(41)-C(42) | 93.2(4)   |
| N(3)-C(40)-C(41)-C(46)  | 36.7(5)   |
| C(47)-C(40)-C(41)-C(46) | -80.0(5)  |
| C(46)-C(41)-C(42)-C(43) | 1.9(8)    |
| C(40)-C(41)-C(42)-C(43) | -171.5(5) |
| C(41)-C(42)-C(43)-C(44) | -0.5(10)  |
| C(42)-C(43)-C(44)-C(45) | -1.1(11)  |
| C(43)-C(44)-C(45)-C(46) | 1.3(10)   |
| C(44)-C(45)-C(46)-C(41) | 0.1(8)    |
| C(42)-C(41)-C(46)-C(45) | -1.6(7)   |
| C(40)-C(41)-C(46)-C(45) | 171.4(4)  |
| N(3)-C(40)-C(47)-C(66)  | -69.8(3)  |
| C(41)-C(40)-C(47)-C(66) | 56.4(4)   |
| N(3)-C(40)-C(47)-C(48)  | 163.4(3)  |

|                         |           |
|-------------------------|-----------|
| C(41)-C(40)-C(47)-C(48) | -70.5(4)  |
| N(3)-C(40)-C(47)-C(55)  | 44.1(3)   |
| C(41)-C(40)-C(47)-C(55) | 170.2(3)  |
| C(66)-C(47)-C(48)-O(7)  | 161.3(4)  |
| C(55)-C(47)-C(48)-O(7)  | 39.2(5)   |
| C(40)-C(47)-C(48)-O(7)  | -72.7(4)  |
| C(66)-C(47)-C(48)-C(49) | -17.2(5)  |
| C(55)-C(47)-C(48)-C(49) | -139.3(3) |
| C(40)-C(47)-C(48)-C(49) | 108.7(4)  |
| O(7)-C(48)-C(49)-C(54)  | -36.6(6)  |
| C(47)-C(48)-C(49)-C(54) | 141.8(4)  |
| O(7)-C(48)-C(49)-C(50)  | 141.9(5)  |
| C(47)-C(48)-C(49)-C(50) | -39.6(6)  |
| C(54)-C(49)-C(50)-C(51) | 1.6(7)    |
| C(48)-C(49)-C(50)-C(51) | -176.8(4) |
| C(49)-C(50)-C(51)-C(52) | -2.4(7)   |
| C(50)-C(51)-C(52)-C(53) | 0.5(8)    |
| C(51)-C(52)-C(53)-C(54) | 2.2(9)    |
| C(50)-C(49)-C(54)-C(53) | 1.0(7)    |
| C(48)-C(49)-C(54)-C(53) | 179.5(4)  |
| C(52)-C(53)-C(54)-C(49) | -2.9(8)   |
| C(66)-C(47)-C(55)-C(56) | 72.4(3)   |
| C(48)-C(47)-C(55)-C(56) | -162.9(3) |
| C(40)-C(47)-C(55)-C(56) | -43.8(3)  |
| C(66)-C(47)-C(55)-C(57) | -56.1(4)  |
| C(48)-C(47)-C(55)-C(57) | 68.7(4)   |
| C(40)-C(47)-C(55)-C(57) | -172.3(3) |
| C(40)-N(3)-C(56)-C(55)  | 2.3(4)    |
| S(2)-N(3)-C(56)-C(55)   | 146.0(2)  |
| C(57)-C(55)-C(56)-N(3)  | 152.3(3)  |
| C(47)-C(55)-C(56)-N(3)  | 26.3(3)   |
| C(56)-C(55)-C(57)-C(58) | 64.0(4)   |
| C(47)-C(55)-C(57)-C(58) | -175.5(3) |
| C(55)-C(57)-C(58)-O(8)  | -28.1(6)  |
| C(55)-C(57)-C(58)-C(59) | 152.5(4)  |
| O(8)-C(58)-C(59)-C(64)  | -8.5(7)   |
| C(57)-C(58)-C(59)-C(64) | 170.9(4)  |
| O(8)-C(58)-C(59)-C(60)  | 171.9(4)  |
| C(57)-C(58)-C(59)-C(60) | -8.6(6)   |
| C(64)-C(59)-C(60)-C(61) | 2.1(7)    |
| C(58)-C(59)-C(60)-C(61) | -178.3(4) |
| C(59)-C(60)-C(61)-C(62) | -0.7(7)   |
| C(60)-C(61)-C(62)-C(63) | -0.1(8)   |
| C(61)-C(62)-C(63)-C(64) | -0.5(8)   |

|                         |          |
|-------------------------|----------|
| C(62)-C(63)-C(64)-C(59) | 2.0(8)   |
| C(60)-C(59)-C(64)-C(63) | -2.8(7)  |
| C(58)-C(59)-C(64)-C(63) | 177.6(5) |

---

**Symmetry transformations used to generate equivalent atoms:**

**Table 7. Hydrogen bonds for 3aa [ $\text{\AA}$  and  $^\circ$ ].**

| D-H...A | d(D-H) | d(H...A) | d(D...A) | $\angle(\text{DHA})$ |
|---------|--------|----------|----------|----------------------|
|---------|--------|----------|----------|----------------------|

---
